# Supplementary material for: scTFBridge: A Disentangled Deep Generative Model Informed by TF-Motif Binding for Gene Regulation Inference in Single-Cell Multi-Omics
Source: Research Square preprint supplement (doi:10.21203/rs.3.rs-6093896/v1), 2025-03-18
Supplement: Supplementary file 1 [file 42d61762dafe936f1ff69015.docx]

**Table of Contents for Supplementary Information**

Description of Supplementary Tables

Description of Supplementary Data

Supplementary Figures

**Description of Supplementary Tables**

**Supplementary Table 1**. Single cell eQTL ground truth profile for cis-regulation inference in scQTLbase website.

**Supplementary Table 2.** CistromeID of TF Chip-seq served as the ground truth for trans-regulation.

**Supplementary Table 3.** Hyperparameters of each learning object in scTFBridge training.

**Description of Supplementary Data**

**Supplementary Data 1-10.** Results of shared and private gene sets GO enrichment in B cell, endothelial, myeloid, plasma, and T cell.

**Supplementary Data 11.** Results of shared and private peak set heritability enrichment in B cell, endothelial, myeloid, plasma, and T cell.


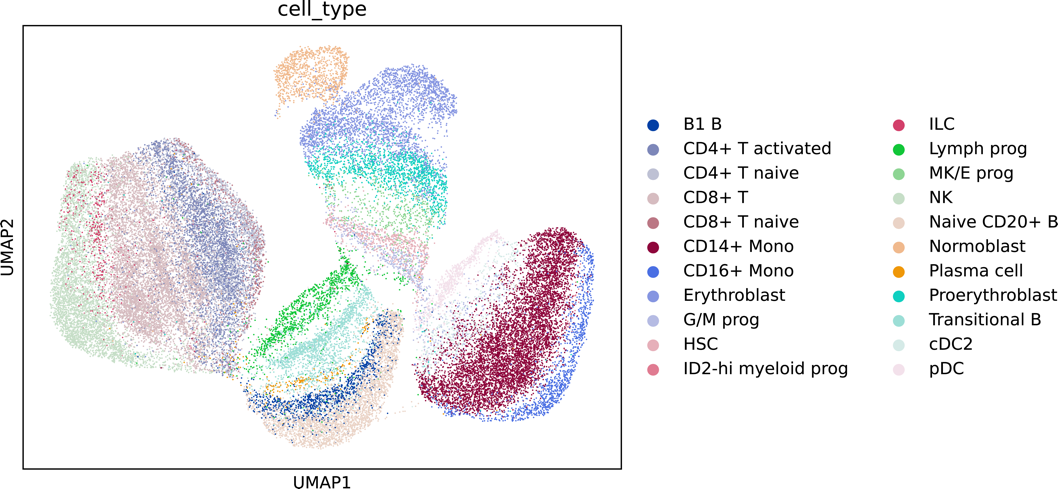


**Fig. S1. UMAP visualization of ATAC-private embedding in BMMC dataset.**


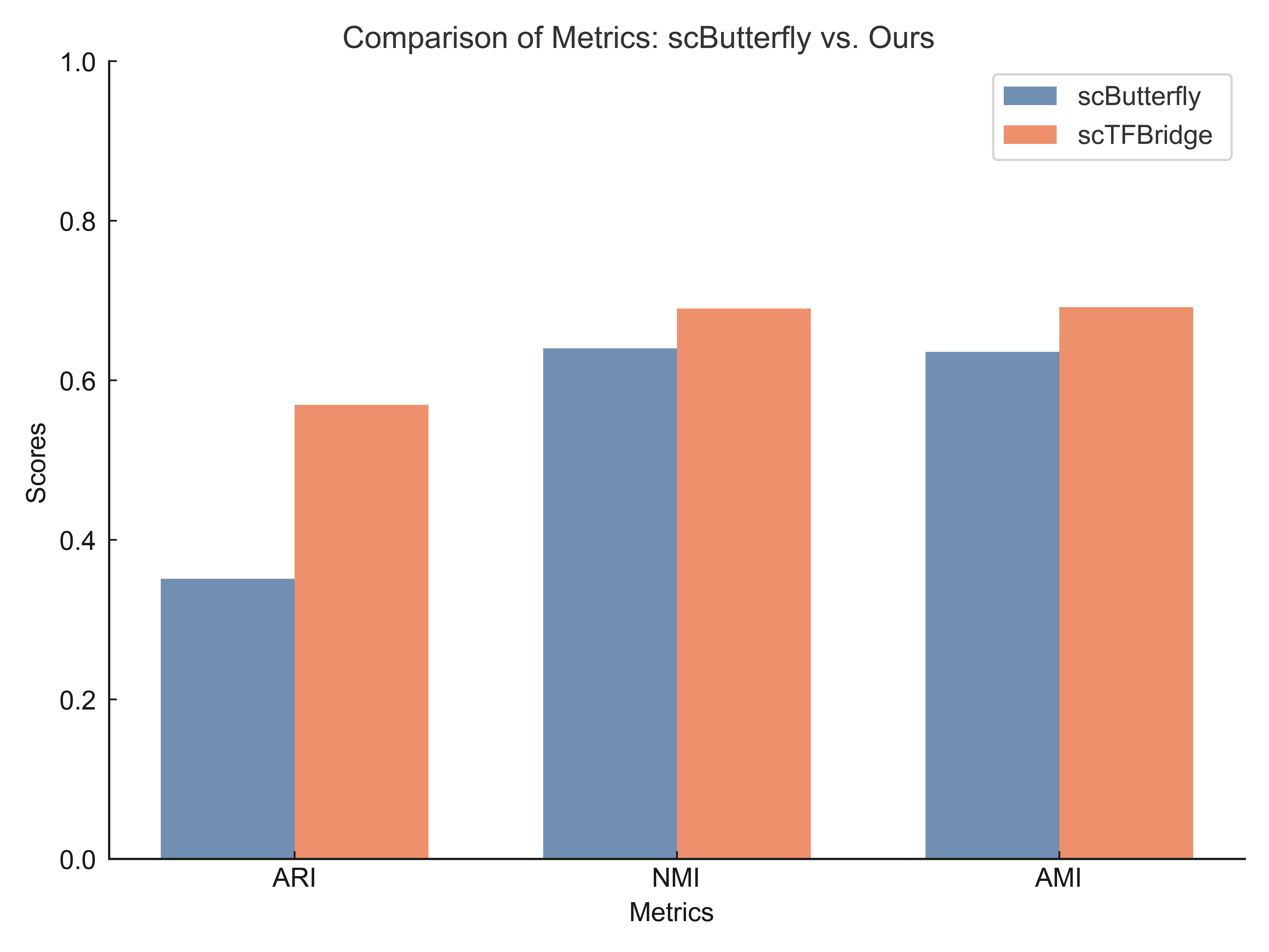


**Fig. S2 Comparison of TG expression reconstruction performance across cell types.** TG expression reconstruction was evaluated using ARI, NMI, and AMI metrics to assess the recovery of cell clusters based on cell type annotations, compared with scButterfly.


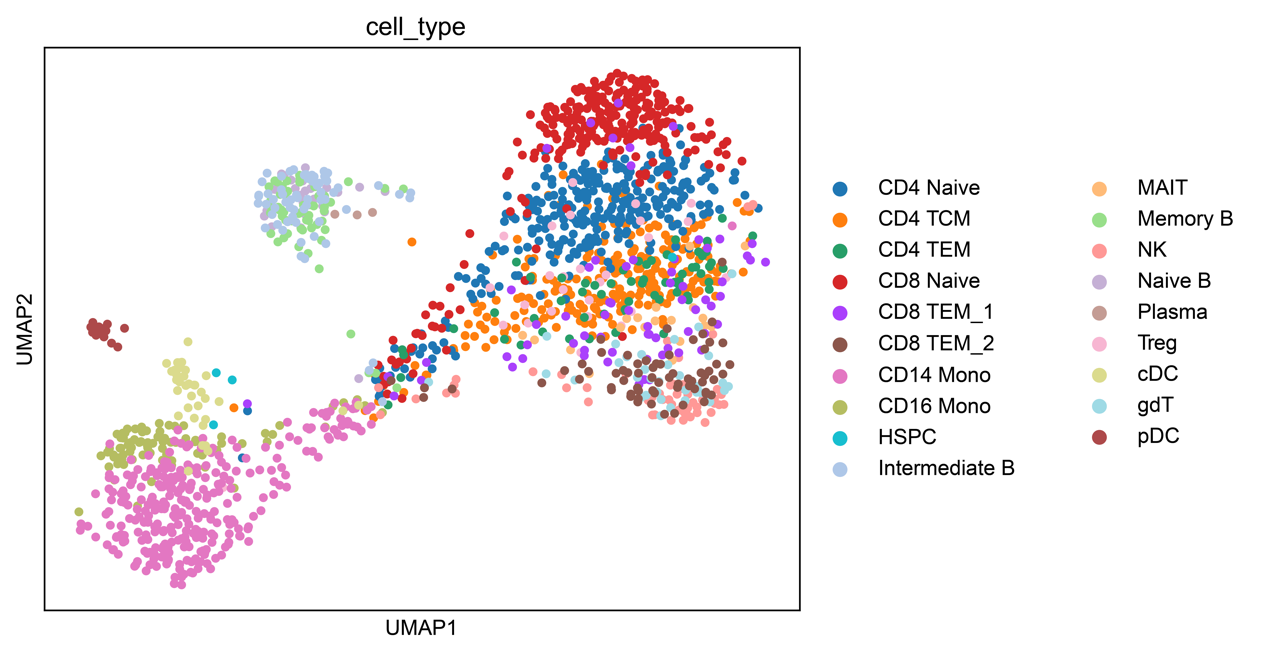


**Fig. S3. Visualization of ATAC-private embedding in PBMC dataset.**


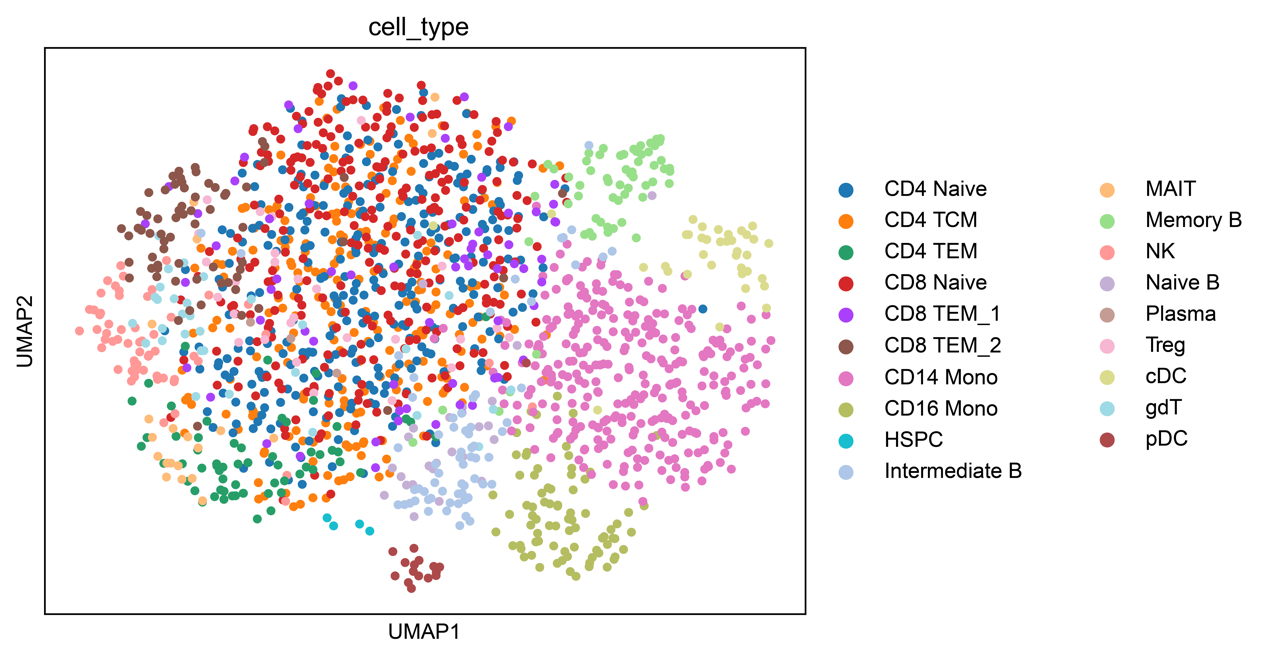


**Fig. S4. Visualization of RNA-private embedding in PBMC dataset.**


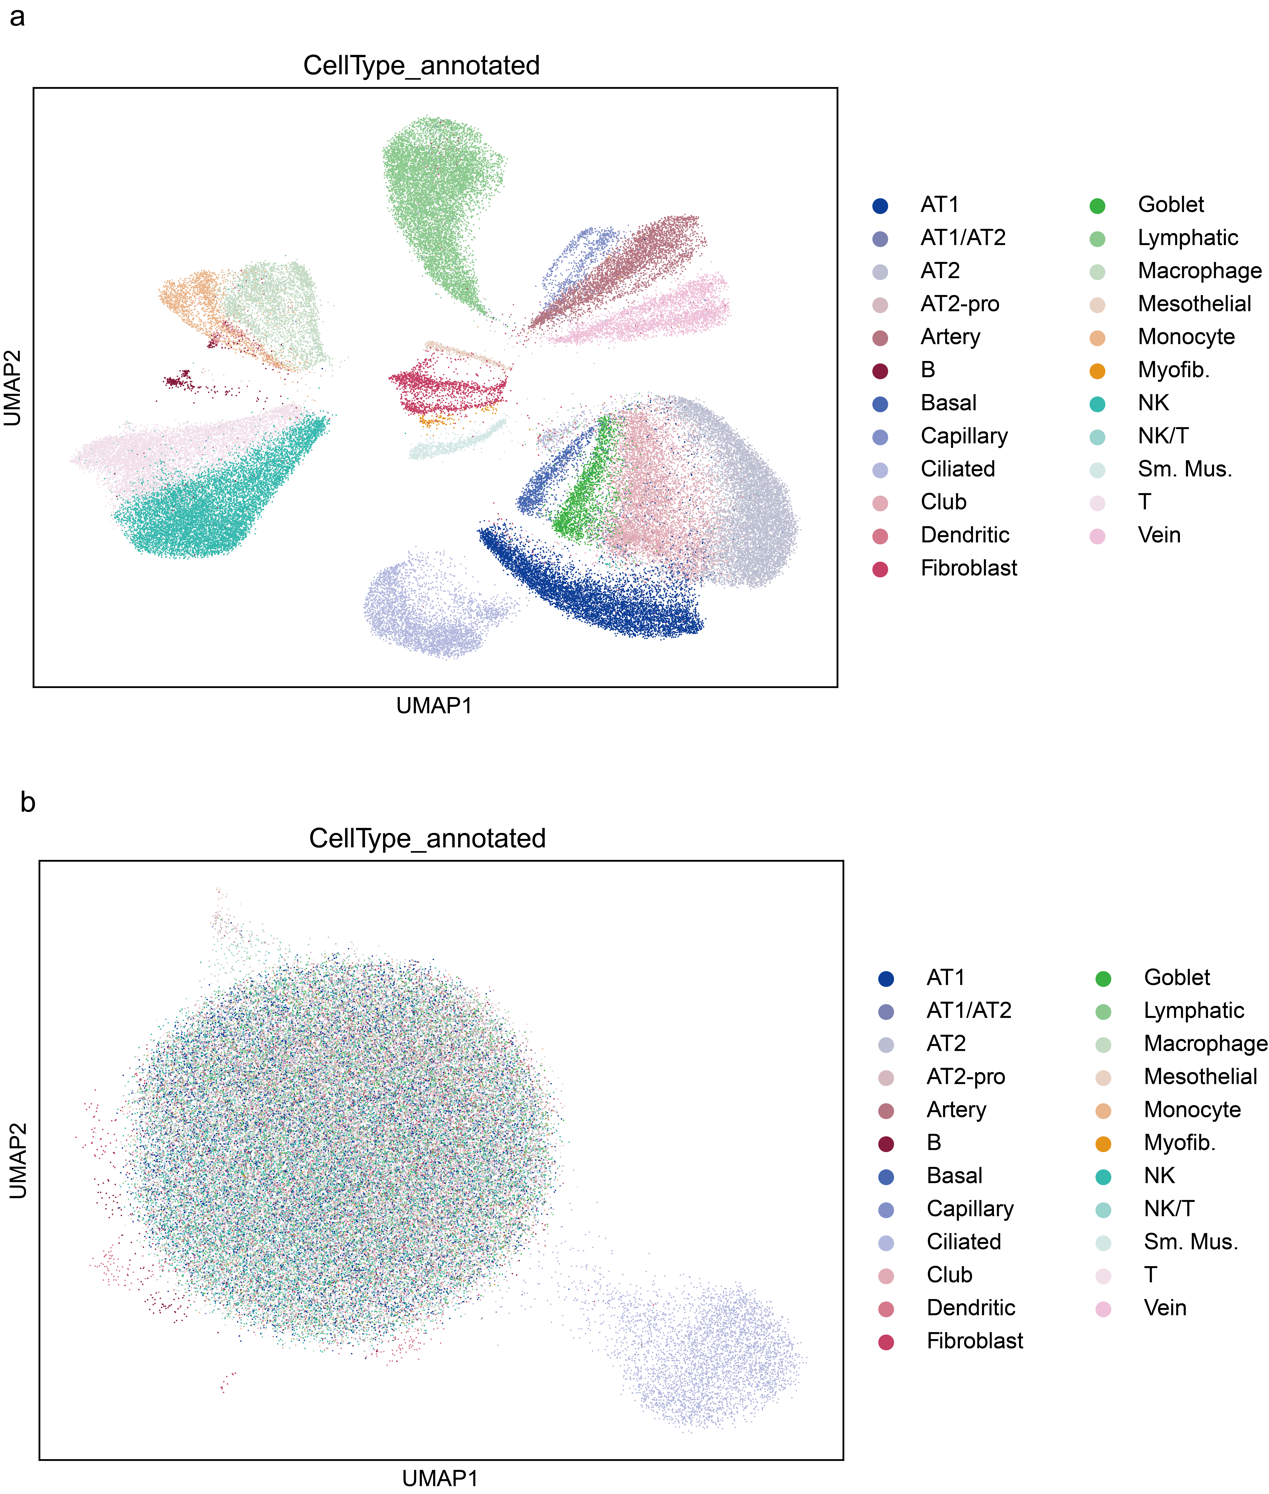


**Fig S5. Visualization of ATAC-private, RNA-private embedding in lung cancer atlas dataset.** (a) UMAP visualization of ATAC-private embedding. (b) UMAP visualization of RNA-private embedding.


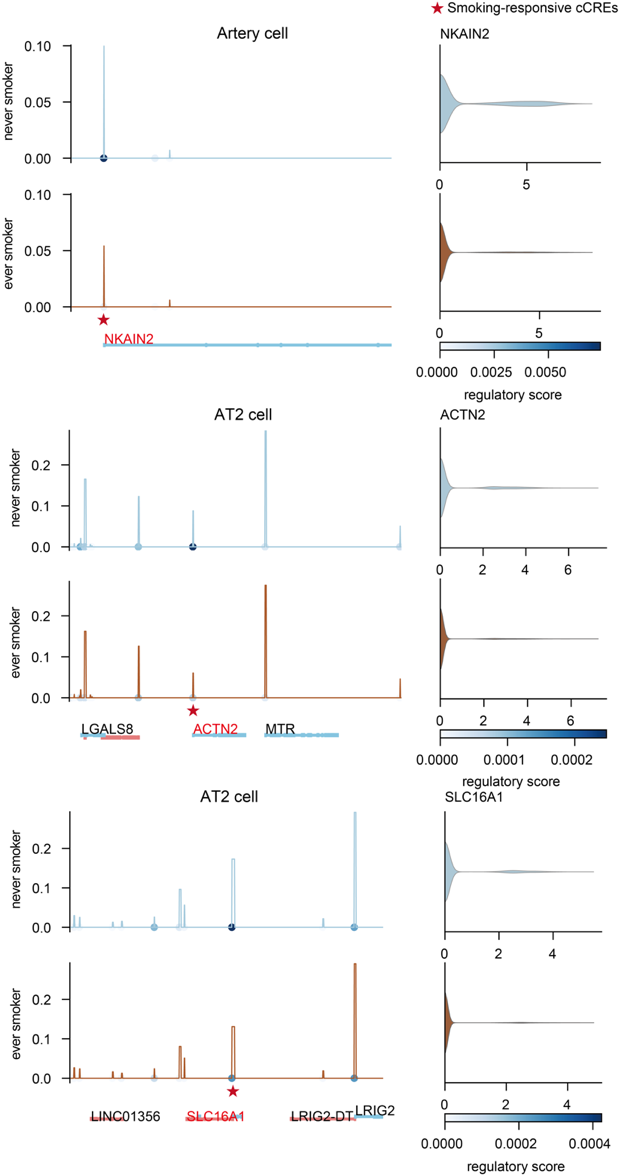


**Fig. S6. Regulation of Smoking-Responsive CREs on Target Genes.** Smoking-responsive CREs and their regulated target genes in ever- and never-smokers are shown for specific cell types. The expression levels of the target genes are presented, along with the corresponding linked peak regulation scores.
