# Supplementary material for: scTFBridge: A Disentangled Deep Generative Model Informed by TF-Motif Binding for Gene Regulation Inference in Single-Cell Multi-Omics
Source: Research Square preprint supplement (doi:10.21203/rs.3.rs-6093896/v1), 2025-03-18
Supplement: Supplementary file 2 [file 4b917d0600d8c1a4590637d8.xlsx]

## Sheet: SD1
Supplementary Data 1. B cell private gene enrichment
source	term_name	term_id	highlighted	adjusted_p_value	negative_log10_of_adjusted_p_value	term_size	query_size	intersection_size	effective_domain_size	intersections
GO:BP	chromosome segregation	GO:0007059	TRUE	3.24248e-07	6.48912	425	99	16	21031	ASPM,TOP2A,TEX14,KNL1,MKI67,DIAPH3,CENPF,CENPM,KIF14,BRIP1,CENPE,NUF2,NDC80,KIF18A,HSPA1B,SGO1
GO:BP	metaphase chromosome alignment	GO:0051310	FALSE	2.84174e-06	5.54642	102	99	9	21031	TEX14,KNL1,CENPF,KIF14,CENPE,NUF2,NDC80,KIF18A,SGO1
GO:BP	organelle fission	GO:0048285	FALSE	2.97379e-06	5.52669	495	99	16	21031	ASPM,TOP2A,TEX14,KNL1,MKI67,CDC14A,CENPF,KIF14,BRIP1,CENPE,NUF2,NDC80,KIF18A,MAPT,HSPA1B,SGO1
GO:BP	nuclear division	GO:0000280	FALSE	6.18928e-06	5.20836	447	99	15	21031	ASPM,TOP2A,TEX14,KNL1,MKI67,CDC14A,CENPF,KIF14,BRIP1,CENPE,NUF2,NDC80,KIF18A,HSPA1B,SGO1
GO:BP	nuclear chromosome segregation	GO:0098813	FALSE	7.41213e-06	5.13006	318	99	13	21031	ASPM,TOP2A,TEX14,KNL1,CENPF,KIF14,BRIP1,CENPE,NUF2,NDC80,KIF18A,HSPA1B,SGO1
GO:BP	cell cycle process	GO:0022402	FALSE	8.46815e-06	5.07221	1276	99	24	21031	ASPM,TOP2A,TEX14,KNL1,MKI67,CRADD,CDC14A,DIAPH3,STMN1,BCL2,CENPF,CENPM,KIF14,BRIP1,CENPE,BIN3,EIF4E,NUF2,CLSPN,CKAP2,NDC80,KIF18A,HSPA1B,SGO1
GO:BP	establishment of chromosome localization	GO:0051303	FALSE	8.9609e-06	5.04765	116	99	9	21031	TEX14,KNL1,CENPF,KIF14,CENPE,NUF2,NDC80,KIF18A,SGO1
GO:BP	chromosome localization	GO:0050000	FALSE	1.6171e-05	4.79126	124	99	9	21031	TEX14,KNL1,CENPF,KIF14,CENPE,NUF2,NDC80,KIF18A,SGO1
GO:BP	B cell receptor signaling pathway	GO:0050853	TRUE	9.76008e-05	4.01055	71	99	7	21031	IGLC3,IGHA1,IGHG1,BCL2,IGHM,VAV3,PTPN22
GO:BP	mitotic cell cycle process	GO:1903047	FALSE	0.00015072	3.82183	745	99	17	21031	TEX14,KNL1,MKI67,CRADD,CDC14A,STMN1,BCL2,CENPF,KIF14,CENPE,EIF4E,NUF2,CLSPN,CKAP2,NDC80,KIF18A,HSPA1B
GO:BP	cell division	GO:0051301	TRUE	0.000155438	3.80844	656	99	16	21031	MLLT3,ASPM,TOP2A,TEX14,KNL1,CDC14A,STMN1,CENPF,KIF14,BRIP1,CENPE,BIN3,NUF2,CKAP2,NDC80,SGO1
GO:BP	mitotic nuclear division	GO:0140014	FALSE	0.000187612	3.72674	279	99	11	21031	TEX14,KNL1,MKI67,CDC14A,CENPF,KIF14,CENPE,NUF2,NDC80,KIF18A,HSPA1B
GO:BP	sister chromatid segregation	GO:0000819	FALSE	0.000304568	3.51632	230	99	10	21031	TOP2A,TEX14,KNL1,CENPF,KIF14,CENPE,NUF2,NDC80,KIF18A,HSPA1B
GO:BP	attachment of spindle microtubules to kinetochore	GO:0008608	FALSE	0.000407296	3.39009	53	99	6	21031	TEX14,KNL1,CENPE,NUF2,NDC80,SGO1
GO:BP	negative regulation of cellular component organization	GO:0051129	FALSE	0.000539339	3.26814	719	99	16	21031	TFRC,TOP2A,TEX14,KNL1,DIAPH3,STMN1,CENPF,KIF14,CXCL10,NUF2,CKAP2,TRPC5,NDC80,MAPT,HSPA1B,RAB3IP
GO:BP	mitotic sister chromatid segregation	GO:0000070	FALSE	0.000619676	3.20784	189	99	9	21031	TEX14,KNL1,CENPF,KIF14,CENPE,NUF2,NDC80,KIF18A,HSPA1B
GO:BP	meiotic nuclear division	GO:0140013	FALSE	0.000879527	3.05575	197	99	9	21031	ASPM,TOP2A,TEX14,KNL1,BRIP1,NUF2,NDC80,KIF18A,SGO1
GO:BP	regulation of mitotic cell cycle phase transition	GO:1901990	FALSE	0.00106966	2.97075	332	99	11	21031	TEX14,KNL1,CRADD,CDC14A,BCL2,CENPF,KIF14,CENPE,NUF2,CLSPN,NDC80
GO:BP	regulation of mitotic cell cycle	GO:0007346	FALSE	0.0013238	2.87818	496	99	13	21031	TEX14,KNL1,MKI67,CRADD,CDC14A,BCL2,CENPF,KIF14,CENPE,EIF4E,NUF2,CLSPN,NDC80
GO:BP	cell cycle	GO:0007049	FALSE	0.00170889	2.76728	1819	99	25	21031	ASPM,TOP2A,TEX14,KNL1,MKI67,CRADD,CDC14A,DIAPH3,STMN1,BCL2,CENPF,CENPM,KIF14,BRIP1,CENPE,BIN3,EIF4E,NUF2,CLSPN,CKAP2,NDC80,UHRF1,KIF18A,HSPA1B,SGO1
GO:BP	mitotic cell cycle	GO:0000278	FALSE	0.00199192	2.70073	895	99	17	21031	TEX14,KNL1,MKI67,CRADD,CDC14A,STMN1,BCL2,CENPF,KIF14,CENPE,EIF4E,NUF2,CLSPN,CKAP2,NDC80,KIF18A,HSPA1B
GO:BP	mitotic cell cycle phase transition	GO:0044772	FALSE	0.00202863	2.6928	432	99	12	21031	TEX14,KNL1,CRADD,CDC14A,BCL2,CENPF,KIF14,CENPE,EIF4E,NUF2,CLSPN,NDC80
GO:BP	regulation of cell cycle phase transition	GO:1901987	FALSE	0.00207842	2.68227	433	99	12	21031	TEX14,KNL1,CRADD,CDC14A,BCL2,CENPF,KIF14,BRIP1,CENPE,NUF2,CLSPN,NDC80
GO:BP	meiotic cell cycle process	GO:1903046	FALSE	0.00213478	2.67065	219	99	9	21031	ASPM,TOP2A,TEX14,KNL1,BRIP1,NUF2,NDC80,KIF18A,SGO1
GO:BP	negative regulation of organelle organization	GO:0010639	FALSE	0.00243531	2.61345	361	99	11	21031	TFRC,TOP2A,TEX14,KNL1,DIAPH3,STMN1,CENPF,NUF2,CKAP2,NDC80,MAPT
GO:BP	organelle localization	GO:0051640	FALSE	0.00278165	2.5557	620	99	14	21031	ASPM,TEX14,KNL1,CENPF,KIF14,CENPE,NR4A3,NUF2,NDC80,BORCS5,KIF18A,MAPT,RAB3IP,SGO1
GO:BP	cell cycle phase transition	GO:0044770	FALSE	0.0032136	2.49301	537	99	13	21031	TEX14,KNL1,CRADD,CDC14A,BCL2,CENPF,KIF14,BRIP1,CENPE,EIF4E,NUF2,CLSPN,NDC80
GO:BP	immune response-activating cell surface receptor signaling pathway	GO:0002429	FALSE	0.00336827	2.47259	299	99	10	21031	IGLC3,IGHA1,PELI1,IGHG1,BCL2,IGHM,VAV3,PDE4D,NR4A3,PTPN22
GO:BP	cellular response to stimulus	GO:0051716	FALSE	0.00364251	2.4386	7394	99	58	21031	TANK,IGLC3,MLLT3,TFRC,ASPM,TOP2A,TEX14,IGHA1,PELI1,KNL1,CRADD,DIAPH3,IGHG1,STMN1,BCL2,IGHM,VAV3,CENPF,PDE4D,RBPJ,DUSP16,KIF14,NIBAN1,SESN3,PDE3B,BRIP1,CXCL10,CD274,EIF4E,NR4A3,HOMER1,PLCL1,NUF2,CLSPN,ITGA2B,NDC80,UHRF1,RALGAPA2,PTPN22,MT1X,ARHGAP11B,ARHGAP19,PTPRM,HERPUD2,RNF43,KIF18A,FABP4,DEPDC1B,MAPT,HSPA1B,OXSR1,TIMP1,BNIP3L,PLIN2,TMEM131L,ERCC5,CHRM3,RNASEH2A
GO:BP	chromosome organization	GO:0051276	FALSE	0.00368268	2.43384	635	99	14	21031	TOP2A,TEX14,KNL1,CENPF,KIF14,BRIP1,CENPE,NUF2,NAF1,NDC80,KIF18A,MAPT,HSPA1B,SGO1
GO:BP	negative regulation of mitotic cell cycle phase transition	GO:1901991	FALSE	0.00514754	2.2884	181	99	8	21031	TEX14,KNL1,CRADD,BCL2,CENPF,NUF2,CLSPN,NDC80
GO:BP	spindle assembly checkpoint signaling	GO:0071173	FALSE	0.00558046	2.25333	46	99	5	21031	TEX14,KNL1,CENPF,NUF2,NDC80
GO:BP	mitotic spindle assembly checkpoint signaling	GO:0007094	FALSE	0.00558046	2.25333	46	99	5	21031	TEX14,KNL1,CENPF,NUF2,NDC80
GO:BP	mitotic spindle checkpoint signaling	GO:0071174	FALSE	0.00558046	2.25333	46	99	5	21031	TEX14,KNL1,CENPF,NUF2,NDC80
GO:BP	microtubule cytoskeleton organization	GO:0000226	TRUE	0.0056753	2.24601	659	99	14	21031	ASPM,RNF19A,CDC14A,DIAPH3,STMN1,CENPE,NUF2,CKAP2,NDC80,KIF18A,MAPT,HSPA1B,MAP7D2,SGO1
GO:BP	regulation of chromosome segregation	GO:0051983	FALSE	0.00587455	2.23103	129	99	7	21031	TEX14,KNL1,MKI67,CENPF,CENPE,NUF2,NDC80
GO:BP	kinetochore organization	GO:0051383	FALSE	0.00590868	2.22851	21	99	4	21031	CENPF,CENPE,NUF2,NDC80
GO:BP	regulation of chromosome organization	GO:0033044	FALSE	0.00596139	2.22465	248	99	9	21031	TOP2A,TEX14,KNL1,CENPF,CENPE,NUF2,NAF1,NDC80,MAPT
GO:BP	spindle checkpoint signaling	GO:0031577	FALSE	0.0062216	2.2061	47	99	5	21031	TEX14,KNL1,CENPF,NUF2,NDC80
GO:BP	establishment of organelle localization	GO:0051656	FALSE	0.00688697	2.16197	486	99	12	21031	TEX14,KNL1,CENPF,KIF14,CENPE,NR4A3,NUF2,NDC80,BORCS5,KIF18A,MAPT,SGO1
GO:BP	negative regulation of mitotic sister chromatid segregation	GO:0033048	FALSE	0.00691924	2.15994	48	99	5	21031	TEX14,KNL1,CENPF,NUF2,NDC80
GO:BP	negative regulation of mitotic sister chromatid separation	GO:2000816	FALSE	0.00691924	2.15994	48	99	5	21031	TEX14,KNL1,CENPF,NUF2,NDC80
GO:BP	negative regulation of sister chromatid segregation	GO:0033046	FALSE	0.00691924	2.15994	48	99	5	21031	TEX14,KNL1,CENPF,NUF2,NDC80
GO:BP	negative regulation of mitotic metaphase/anaphase transition	GO:0045841	FALSE	0.00691924	2.15994	48	99	5	21031	TEX14,KNL1,CENPF,NUF2,NDC80
GO:BP	immune response-regulating cell surface receptor signaling pathway	GO:0002768	FALSE	0.00749686	2.12512	327	99	10	21031	IGLC3,IGHA1,PELI1,IGHG1,BCL2,IGHM,VAV3,PDE4D,NR4A3,PTPN22
GO:BP	antigen receptor-mediated signaling pathway	GO:0050851	FALSE	0.00767958	2.11466	191	99	8	21031	IGLC3,IGHA1,IGHG1,BCL2,IGHM,VAV3,PDE4D,PTPN22
GO:BP	negative regulation of chromosome segregation	GO:0051985	FALSE	0.0084982	2.07067	50	99	5	21031	TEX14,KNL1,CENPF,NUF2,NDC80
GO:BP	negative regulation of chromosome separation	GO:1905819	FALSE	0.0084982	2.07067	50	99	5	21031	TEX14,KNL1,CENPF,NUF2,NDC80
GO:BP	negative regulation of metaphase/anaphase transition of cell cycle	GO:1902100	FALSE	0.0084982	2.07067	50	99	5	21031	TEX14,KNL1,CENPF,NUF2,NDC80
GO:BP	negative regulation of cell cycle phase transition	GO:1901988	FALSE	0.00876794	2.0571	260	99	9	21031	TEX14,KNL1,CRADD,BCL2,CENPF,BRIP1,NUF2,CLSPN,NDC80
GO:BP	regulation of mitotic metaphase/anaphase transition	GO:0030071	FALSE	0.00960119	2.01768	90	99	6	21031	TEX14,KNL1,CENPF,CENPE,NUF2,NDC80
GO:BP	cell cycle checkpoint signaling	GO:0000075	FALSE	0.00965523	2.01524	197	99	8	21031	TEX14,KNL1,CRADD,CENPF,BRIP1,NUF2,CLSPN,NDC80
GO:BP	negative regulation of biological process	GO:0048519	FALSE	0.00972917	2.01192	5874	99	49	21031	TANK,GBE1,MLLT3,TFRC,ASPM,TOP2A,TEX14,PELI1,KNL1,CRADD,DIAPH3,STMN1,BCL2,SARNP,CENPF,PDE4D,RBPJ,ANO9,DUSP16,KIF14,NIBAN1,SESN3,PDE3B,BRIP1,CXCL10,CD274,EIF4E,NR4A3,PLCL1,NUF2,CLSPN,NAF1,CKAP2,TRPC5,NDC80,UHRF1,PTPN22,MT1X,PTPRM,RNF43,FABP4,MAPT,HSPA1B,OXSR1,TIMP1,BNIP3L,RAB3IP,TMEM131L,ERCC5
GO:BP	negative regulation of cellular process	GO:0048523	FALSE	0.0114535	1.94106	5541	99	47	21031	TANK,GBE1,MLLT3,TFRC,ASPM,TOP2A,TEX14,PELI1,KNL1,CRADD,DIAPH3,STMN1,BCL2,SARNP,CENPF,PDE4D,RBPJ,ANO9,DUSP16,KIF14,NIBAN1,SESN3,PDE3B,BRIP1,CXCL10,CD274,EIF4E,NR4A3,NUF2,CLSPN,NAF1,CKAP2,TRPC5,NDC80,UHRF1,PTPN22,PTPRM,RNF43,FABP4,MAPT,HSPA1B,OXSR1,TIMP1,BNIP3L,RAB3IP,TMEM131L,ERCC5
GO:BP	regulation of metaphase/anaphase transition of cell cycle	GO:1902099	FALSE	0.0116217	1.93473	93	99	6	21031	TEX14,KNL1,CENPF,CENPE,NUF2,NDC80
GO:BP	meiotic chromosome segregation	GO:0045132	FALSE	0.0116217	1.93473	93	99	6	21031	ASPM,KNL1,BRIP1,NUF2,NDC80,SGO1
GO:BP	regulation of biological process	GO:0050789	FALSE	0.0122407	1.91219	12287	99	79	21031	TANK,GBE1,IGLC3,MLLT3,TFRC,ASPM,TOP2A,TEX14,IGHA1,CEMIP2,PELI1,RNF19A,KNL1,MKI67,CRADD,CDC14A,DIAPH3,IGHG1,ANKH,RANBP2,STMN1,BCL2,IGHM,VAV3,SARNP,CENPF,PDE4D,RBPJ,HSPH1,ANO9,DUSP16,KIF14,NIBAN1,SESN3,PDE3B,BRIP1,ZNF367,STPG4,CXCL10,CENPE,TAF4B,CD274,GABPB1,BIN3,EIF4E,NR4A3,HOMER1,PLCL1,NUF2,CLSPN,ITGA2B,NAF1,CKAP2,TRPC5,NDC80,UHRF1,RALGAPA2,PTPN22,MT1X,ARHGAP11B,ICE2,ARHGAP19,PTPRM,BORCS5,HERPUD2…
GO:BP	metaphase/anaphase transition of mitotic cell cycle	GO:0007091	FALSE	0.0123672	1.90773	94	99	6	21031	TEX14,KNL1,CENPF,CENPE,NUF2,NDC80
GO:BP	regulation of mitotic sister chromatid segregation	GO:0033047	FALSE	0.0124972	1.90319	54	99	5	21031	TEX14,KNL1,CENPF,NUF2,NDC80
GO:BP	negative regulation of chromosome organization	GO:2001251	FALSE	0.013151	1.88104	95	99	6	21031	TOP2A,TEX14,KNL1,CENPF,NUF2,NDC80
GO:BP	mitotic cell cycle checkpoint signaling	GO:0007093	FALSE	0.0133529	1.87442	146	99	7	21031	TEX14,KNL1,CRADD,CENPF,NUF2,CLSPN,NDC80
GO:BP	metaphase/anaphase transition of cell cycle	GO:0044784	FALSE	0.0148399	1.82857	97	99	6	21031	TEX14,KNL1,CENPF,CENPE,NUF2,NDC80
GO:BP	negative regulation of mitotic nuclear division	GO:0045839	FALSE	0.0149828	1.82441	56	99	5	21031	TEX14,KNL1,CENPF,NUF2,NDC80
GO:BP	regulation of cell cycle process	GO:0010564	FALSE	0.0167052	1.77715	724	99	14	21031	TEX14,KNL1,MKI67,CRADD,CDC14A,BCL2,CENPF,KIF14,BRIP1,CENPE,NUF2,CLSPN,NDC80,HSPA1B
GO:BP	positive regulation of immune system process	GO:0002684	FALSE	0.0179468	1.74601	1054	99	17	21031	IGLC3,TFRC,IGHA1,PELI1,IGHG1,BCL2,IGHM,VAV3,PDE4D,HSPH1,CXCL10,CD274,NR4A3,ITGA2B,PTPN22,HSPA1B,OXSR1
GO:BP	regulation of mitotic sister chromatid separation	GO:0010965	FALSE	0.0194191	1.71177	59	99	5	21031	TEX14,KNL1,CENPF,NUF2,NDC80
GO:BP	microtubule-based process	GO:0007017	FALSE	0.0208946	1.67997	953	99	16	21031	ASPM,RNF19A,CDC14A,DIAPH3,STMN1,KIF14,CENPE,NUF2,CKAP2,NDC80,BORCS5,KIF18A,MAPT,HSPA1B,MAP7D2,SGO1
GO:BP	intracellular signal transduction	GO:0035556	FALSE	0.0210975	1.67577	2668	99	29	21031	TANK,TFRC,TEX14,PELI1,KNL1,CRADD,STMN1,BCL2,VAV3,CENPF,PDE4D,DUSP16,KIF14,SESN3,PDE3B,BRIP1,NR4A3,PLCL1,NUF2,CLSPN,NDC80,RALGAPA2,PTPN22,ARHGAP11B,ARHGAP19,DEPDC1B,MAPT,OXSR1,CHRM3
GO:BP	meiotic cell cycle	GO:0051321	FALSE	0.0211725	1.67423	290	99	9	21031	ASPM,TOP2A,TEX14,KNL1,BRIP1,NUF2,NDC80,KIF18A,SGO1
GO:BP	regulation of sister chromatid segregation	GO:0033045	FALSE	0.0221917	1.65381	104	99	6	21031	TEX14,KNL1,CENPF,CENPE,NUF2,NDC80
GO:BP	biological regulation	GO:0065007	FALSE	0.0224821	1.64816	12680	99	80	21031	TANK,GBE1,IGLC3,MLLT3,ERO1B,TFRC,ASPM,TOP2A,TEX14,IGHA1,CEMIP2,PELI1,RNF19A,KNL1,MKI67,CRADD,CDC14A,DIAPH3,IGHG1,ANKH,RANBP2,STMN1,BCL2,IGHM,VAV3,SARNP,CENPF,PDE4D,RBPJ,HSPH1,ANO9,DUSP16,KIF14,NIBAN1,SESN3,PDE3B,BRIP1,ZNF367,STPG4,CXCL10,CENPE,TAF4B,CD274,GABPB1,BIN3,EIF4E,NR4A3,HOMER1,PLCL1,NUF2,CLSPN,ITGA2B,NAF1,CKAP2,TRPC5,NDC80,UHRF1,RALGAPA2,PTPN22,MT1X,ARHGAP11B,ICE2,ARHGAP19,PTPRM,BORCS5,H…
GO:BP	mitotic metaphase chromosome alignment	GO:0007080	FALSE	0.022905	1.64007	61	99	5	21031	KIF14,CENPE,NUF2,NDC80,KIF18A
GO:BP	regulation of response to stimulus	GO:0048583	FALSE	0.023188	1.63474	3939	99	37	21031	TANK,IGLC3,MLLT3,TFRC,ASPM,IGHA1,PELI1,KNL1,CRADD,IGHG1,STMN1,BCL2,IGHM,VAV3,PDE4D,RBPJ,DUSP16,KIF14,SESN3,PDE3B,CXCL10,CD274,NR4A3,HOMER1,NDC80,RALGAPA2,PTPN22,ARHGAP11B,ARHGAP19,RNF43,FABP4,DEPDC1B,MAPT,HSPA1B,OXSR1,TIMP1,TMEM131L
GO:BP	mitotic sister chromatid separation	GO:0051306	FALSE	0.0248218	1.60517	62	99	5	21031	TEX14,KNL1,CENPF,NUF2,NDC80
GO:BP	positive regulation of biological process	GO:0048518	FALSE	0.0253524	1.59598	6250	99	50	21031	TANK,IGLC3,MLLT3,TFRC,ASPM,TOP2A,IGHA1,PELI1,RNF19A,KNL1,CRADD,CDC14A,IGHG1,BCL2,IGHM,VAV3,PDE4D,RBPJ,HSPH1,KIF14,NIBAN1,SESN3,STPG4,CXCL10,CENPE,TAF4B,CD274,GABPB1,EIF4E,NR4A3,HOMER1,CLSPN,ITGA2B,NAF1,CKAP2,TRPC5,NDC80,UHRF1,PTPN22,ICE2,BORCS5,FABP4,DEPDC1B,MAPT,HSPA1B,OXSR1,TIMP1,BNIP3L,PLIN2,CHRM3
GO:BP	negative regulation of nuclear division	GO:0051784	FALSE	0.0268615	1.57087	63	99	5	21031	TEX14,KNL1,CENPF,NUF2,NDC80
GO:BP	immune response-activating signaling pathway	GO:0002757	FALSE	0.0273166	1.56357	465	99	11	21031	IGLC3,IGHA1,PELI1,IGHG1,BCL2,IGHM,VAV3,PDE4D,NR4A3,PTPN22,HSPA1B
GO:BP	negative regulation of cell cycle process	GO:0010948	FALSE	0.0292629	1.53368	302	99	9	21031	TEX14,KNL1,CRADD,BCL2,CENPF,BRIP1,NUF2,CLSPN,NDC80
GO:BP	negative regulation of mitotic cell cycle	GO:0045930	FALSE	0.0319147	1.49601	232	99	8	21031	TEX14,KNL1,CRADD,BCL2,CENPF,NUF2,CLSPN,NDC80
GO:BP	signal transduction	GO:0007165	FALSE	0.0377112	1.42353	5959	99	48	21031	TANK,IGLC3,MLLT3,TFRC,ASPM,TEX14,IGHA1,PELI1,KNL1,CRADD,DIAPH3,IGHG1,STMN1,BCL2,IGHM,VAV3,CENPF,PDE4D,RBPJ,DUSP16,KIF14,SESN3,PDE3B,BRIP1,CXCL10,CD274,NR4A3,HOMER1,PLCL1,NUF2,CLSPN,ITGA2B,NDC80,RALGAPA2,PTPN22,ARHGAP11B,ARHGAP19,PTPRM,HERPUD2,RNF43,DEPDC1B,MAPT,HSPA1B,OXSR1,TIMP1,BNIP3L,TMEM131L,CHRM3
GO:BP	cell communication	GO:0007154	FALSE	0.0404119	1.39349	6537	99	51	21031	TANK,IGLC3,MLLT3,TFRC,ASPM,TEX14,IGHA1,PELI1,RNF19A,KNL1,CRADD,DIAPH3,IGHG1,STMN1,BCL2,IGHM,VAV3,CENPF,PDE4D,RBPJ,DUSP16,KIF14,SESN3,PDE3B,BRIP1,CXCL10,CD274,EIF4E,NR4A3,HOMER1,PLCL1,NUF2,CLSPN,ITGA2B,NDC80,RALGAPA2,PTPN22,ARHGAP11B,ARHGAP19,PTPRM,HERPUD2,RNF43,DEPDC1B,MAPT,HSPA1B,OXSR1,TIMP1,BNIP3L,PLIN2,TMEM131L,CHRM3
GO:BP	regulation of mitotic nuclear division	GO:0007088	FALSE	0.0457061	1.34003	118	99	6	21031	TEX14,KNL1,MKI67,CENPF,NUF2,NDC80
GO:BP	immune response-regulating signaling pathway	GO:0002764	FALSE	0.0460861	1.33643	492	99	11	21031	IGLC3,IGHA1,PELI1,IGHG1,BCL2,IGHM,VAV3,PDE4D,NR4A3,PTPN22,HSPA1B
GO:BP	response to stimulus	GO:0050896	FALSE	0.0468502	1.32929	8976	99	63	21031	TANK,IGLC3,MLLT3,IGLC2,TFRC,ASPM,TOP2A,TEX14,IGHA1,PELI1,KNL1,CRADD,DIAPH3,IGHG1,ANKH,RANBP2,STMN1,BCL2,IGHM,VAV3,CENPF,PDE4D,RBPJ,HSPH1,DUSP16,KIF14,NIBAN1,SESN3,PDE3B,BRIP1,CXCL10,CD274,EIF4E,NR4A3,HOMER1,PLCL1,NUF2,CLSPN,ITGA2B,NDC80,UHRF1,RALGAPA2,PTPN22,MT1X,ARHGAP11B,ARHGAP19,PTPRM,HERPUD2,RNF43,KIF18A,FABP4,DEPDC1B,MAPT,HSPA1B,OXSR1,TIMP1,BNIP3L,PLIN2,PKD2L2,TMEM131L,ERCC5,CHRM3,RNASEH2A

## Sheet: SD2
Supplementary Data 2. B cell shared gene enrichment
source	term_name	term_id	highlighted	adjusted_p_value	negative_log10_of_adjusted_p_value	term_size	query_size	intersection_size	effective_domain_size	intersections
GO:BP	response to stimulus	GO:0050896	TRUE	6.98634e-14	13.1558	8976	136	106	21031	PREX2,SEMA3A,ITGB8,FCER1A,MS4A1,VWF,CD79A,FGF10,ADGRL4,F13A1,BANK1,CLIC5,RBM47,CD163,RAPGEF4,SLC8A1,CALCRL,MCTP1,SEMA5A,ADGRL2,CD1C,CCL5,BLK,FLT3,SKAP1,PCSK6,LMCD1,SLC11A1,TNXB,ABI3BP,SEMA3C,COL5A2,RHOJ,ITGBL1,ZNF385B,MARCO,WDFY4,ME1,AQP9,MAGI1,SLCO2B1,GJB2,ADGRB3,ITGAX,MSR1,OLR1,ADAMTS9,IGF1,RALGPS2,AFF3,VEGFC,RAB31,POSTN,CTLA4,THEMIS,TANC1,POU2AF1,PTGIS,ADAMTS5,GPC6,EDNRA,CD86,RGS5,CNKSR3,ADCY4…
GO:BP	cell surface receptor signaling pathway	GO:0007166	FALSE	1.07397e-12	11.969	2799	136	56	21031	SEMA3A,ITGB8,FCER1A,MS4A1,CD79A,FGF10,ADGRL4,BANK1,RBM47,CALCRL,SEMA5A,ADGRL2,CCL5,BLK,FLT3,SKAP1,PCSK6,TNXB,SEMA3C,ITGBL1,MARCO,MAGI1,ADGRB3,ITGAX,IGF1,VEGFC,POSTN,CTLA4,THEMIS,EDNRA,CD86,PRKCQ,MERTK,EFNA5,BMP6,MZB1,ASPN,PADI2,NOTCH3,LYN,PLVAP,FCRL5,SFRP1,SFRP4,ST18,IL7R,ACKR1,CHRDL1,STAP1,ENPP1,EDA,BICC1,COL4A1,ITGA9,FCRL2,IL1R2
GO:BP	multicellular organismal process	GO:0032501	FALSE	3.65689e-12	11.4369	7669	136	95	21031	PREX2,SEMA3A,ITGB8,FCER1A,MS4A1,VWF,CD79A,PTPRB,FGF10,F13A1,BANK1,EMCN,CLIC5,RBM47,BCL11B,SLC8A1,CALCRL,RTN1,MFAP5,SEMA5A,CD1C,CCL5,FLT3,PCSK6,LMCD1,SLC11A1,TNXB,ABI3BP,SEMA3C,COL5A2,RHOJ,MARCO,NEGR1,WDFY4,AQP9,FCRL1,THBS2,SLCO2B1,SNTG2,CRTAC1,GJB2,ADGRB3,ITGAX,MSR1,OLR1,ADAMTS9,IGF1,AFF3,STOX2,VEGFC,ADAMTSL1,POSTN,CTLA4,THEMIS,TANC1,POU2AF1,PTGIS,ADAMTS5,EDNRA,CD86,SMOC1,PCDH17,PRKCQ,COL6A1,MERT…
GO:BP	cell adhesion	GO:0007155	FALSE	9.25752e-12	11.0335	1512	136	40	21031	ITGB8,VWF,EMCN,SEMA5A,CCL5,SKAP1,TNXB,ABI3BP,ITGBL1,NEGR1,THBS2,MAGI1,ITGAX,OLR1,ADAMTS9,IGF1,FBLN2,ADAMTSL1,POSTN,CTLA4,PGM5,CD86,PCDH17,PRKCQ,COL6A1,MERTK,EFNA5,FOLR2,BMP6,LYN,SFRP1,NTN4,NUAK1,IL7R,CNTNAP3B,SLAMF7,EDA,ITGA9,MMRN1,DPP4
GO:BP	leukocyte activation	GO:0045321	FALSE	3.09561e-09	8.50925	946	136	29	21031	ITGB8,FCER1A,MS4A1,CD79A,FGF10,BANK1,BCL11B,CD1C,CCL5,FLT3,SLC11A1,WDFY4,FCRL1,IGF1,CTLA4,THEMIS,POU2AF1,CD86,PRKCQ,MERTK,MZB1,LYN,C1QA,SFRP1,IL7R,SLAMF7,STAP1,DNASE1L3,DPP4
GO:BP	cell activation	GO:0001775	FALSE	3.4197e-09	8.46601	1092	136	31	21031	ITGB8,FCER1A,MS4A1,VWF,CD79A,FGF10,BANK1,BCL11B,CD1C,CCL5,FLT3,SLC11A1,WDFY4,FCRL1,IGF1,CTLA4,THEMIS,POU2AF1,CD86,PRKCQ,MERTK,MZB1,LYN,C1QA,SFRP1,IL7R,SLAMF7,STAP1,DNASE1L3,MMRN1,DPP4
GO:BP	cell communication	GO:0007154	FALSE	9.72646e-09	8.01205	6537	136	81	21031	PREX2,SEMA3A,ITGB8,FCER1A,MS4A1,VWF,CD79A,FGF10,ADGRL4,BANK1,RBM47,RAPGEF4,SLC8A1,CALCRL,MCTP1,SEMA5A,ADGRL2,CCL5,BLK,FLT3,SKAP1,PCSK6,LMCD1,TNXB,SEMA3C,RHOJ,ITGBL1,ZNF385B,MARCO,MYRIP,MAGI1,GJB2,ADGRB3,ITGAX,IGF1,RALGPS2,VEGFC,POSTN,CTLA4,THEMIS,PTGIS,GPC6,EDNRA,CD86,RGS5,CNKSR3,PCDH17,ADCY4,PRKCQ,MERTK,EFNA5,PDE1A,FOLR2,BMP6,MZB1,ASPN,PADI2,NOTCH3,LYN,PLVAP,C1QA,FCRL5,SFRP1,SFRP4,NTN4,ST18,NUAK…
GO:BP	cellular response to stimulus	GO:0051716	FALSE	1.07614e-08	7.96813	7394	136	87	21031	PREX2,SEMA3A,ITGB8,FCER1A,MS4A1,VWF,CD79A,FGF10,ADGRL4,BANK1,RBM47,RAPGEF4,SLC8A1,CALCRL,MCTP1,SEMA5A,ADGRL2,CCL5,BLK,FLT3,SKAP1,PCSK6,LMCD1,SLC11A1,TNXB,SEMA3C,COL5A2,RHOJ,ITGBL1,ZNF385B,MARCO,AQP9,MAGI1,SLCO2B1,GJB2,ADGRB3,ITGAX,MSR1,IGF1,RALGPS2,VEGFC,RAB31,POSTN,CTLA4,THEMIS,PTGIS,GPC6,EDNRA,CD86,RGS5,CNKSR3,ADCY4,PRKCQ,COL6A1,MERTK,MRC1,EFNA5,PDE1A,FOLR2,BMP6,MZB1,ASPN,PADI2,NOTCH3,LYN,PLVAP…
GO:BP	signaling	GO:0023052	FALSE	1.46502e-08	7.83416	6447	136	80	21031	PREX2,SEMA3A,ITGB8,FCER1A,MS4A1,VWF,CD79A,FGF10,ADGRL4,BANK1,RBM47,RAPGEF4,SLC8A1,CALCRL,MCTP1,SEMA5A,ADGRL2,CCL5,BLK,FLT3,SKAP1,PCSK6,LMCD1,TNXB,SEMA3C,RHOJ,ITGBL1,ZNF385B,MARCO,MYRIP,MAGI1,GJB2,ADGRB3,ITGAX,IGF1,RALGPS2,VEGFC,POSTN,CTLA4,THEMIS,PTGIS,GPC6,EDNRA,CD86,RGS5,CNKSR3,PCDH17,ADCY4,PRKCQ,MERTK,EFNA5,PDE1A,BMP6,MZB1,ASPN,PADI2,NOTCH3,LYN,PLVAP,C1QA,FCRL5,SFRP1,SFRP4,NTN4,ST18,NUAK1,PDE3…
GO:BP	signal transduction	GO:0007165	FALSE	7.31e-08	7.13608	5959	136	75	21031	PREX2,SEMA3A,ITGB8,FCER1A,MS4A1,VWF,CD79A,FGF10,ADGRL4,BANK1,RBM47,RAPGEF4,SLC8A1,CALCRL,MCTP1,SEMA5A,ADGRL2,CCL5,BLK,FLT3,SKAP1,PCSK6,LMCD1,TNXB,SEMA3C,RHOJ,ITGBL1,ZNF385B,MARCO,MAGI1,ADGRB3,ITGAX,IGF1,RALGPS2,VEGFC,POSTN,CTLA4,THEMIS,PTGIS,GPC6,EDNRA,CD86,RGS5,CNKSR3,ADCY4,PRKCQ,MERTK,EFNA5,PDE1A,BMP6,MZB1,ASPN,PADI2,NOTCH3,LYN,PLVAP,FCRL5,SFRP1,SFRP4,ST18,NUAK1,PDE3A,IL7R,ACKR1,GPAT3,CHRDL1,ST…
GO:BP	lymphocyte activation	GO:0046649	FALSE	3.31284e-07	6.4798	783	136	24	21031	MS4A1,CD79A,FGF10,BANK1,BCL11B,CD1C,CCL5,FLT3,SLC11A1,WDFY4,FCRL1,IGF1,CTLA4,THEMIS,POU2AF1,CD86,PRKCQ,MERTK,MZB1,LYN,SFRP1,IL7R,SLAMF7,DPP4
GO:BP	regulation of multicellular organismal process	GO:0051239	FALSE	6.15827e-07	6.21054	2955	136	48	21031	SEMA3A,ITGB8,FGF10,BANK1,RBM47,SLC8A1,SEMA5A,CCL5,LMCD1,SLC11A1,TNXB,ABI3BP,SEMA3C,RHOJ,THBS2,ADGRB3,ITGAX,ADAMTS9,IGF1,VEGFC,POSTN,CTLA4,POU2AF1,PTGIS,ADAMTS5,EDNRA,CD86,PRKCQ,MERTK,EFNA5,ABCC9,BMP6,MZB1,ASPN,PI16,LYN,SFRP1,SFRP4,NTN4,PDE3A,IL7R,ACKR1,STAP1,ENPP1,ITGA9,IL1R2,MMRN1,DPP4
GO:BP	cellular response to organic substance	GO:0071310	FALSE	2.83557e-06	5.54736	1971	136	37	21031	RBM47,SLC8A1,CALCRL,CCL5,FLT3,COL5A2,AQP9,GJB2,MSR1,IGF1,VEGFC,RAB31,POSTN,PTGIS,EDNRA,CD86,PRKCQ,COL6A1,MRC1,EFNA5,FOLR2,BMP6,MZB1,PADI2,LYN,PLVAP,SFRP1,ST18,PDE3A,IL7R,ACKR1,STAP1,ENPP1,PCOLCE2,EDA,COL4A1,IL1R2
GO:BP	immune system process	GO:0002376	FALSE	3.0231e-06	5.51955	2776	136	45	21031	ITGB8,FCER1A,MS4A1,CD79A,FGF10,BANK1,RBM47,BCL11B,RAPGEF4,CD1C,CCL5,BLK,FLT3,SKAP1,SLC11A1,SEMA3C,MARCO,WDFY4,FCRL1,OLR1,IGF1,VEGFC,CTLA4,THEMIS,POU2AF1,CD86,PRKCQ,MERTK,MRC1,BMP6,MZB1,PADI2,LYN,PLVAP,C1QA,SFRP1,IL7R,SLAMF7,STAP1,ENPP1,DNASE1L3,EDA,ITGA9,IL1R2,DPP4
GO:BP	anatomical structure development	GO:0048856	FALSE	3.66596e-06	5.43581	5899	136	71	21031	PREX2,SEMA3A,ITGB8,MS4A1,CD79A,PTPRB,FGF10,EMCN,RBM47,BCL11B,SLC8A1,CALCRL,RTN1,MFAP5,SEMA5A,FLT3,PCSK6,TNXB,ABI3BP,SEMA3C,COL5A2,RHOJ,NEGR1,THBS2,SNTG2,CRTAC1,GJB2,ADGRB3,ITGAX,ADAMTS9,IGF1,AFF3,STOX2,VEGFC,ADAMTSL1,POSTN,CTLA4,THEMIS,TANC1,POU2AF1,PTGIS,ADAMTS5,PGM5,EDNRA,CD86,SMOC1,PCDH17,PRKCQ,COL6A1,MERTK,EFNA5,ABCC9,BMP6,ASPN,PADI2,PI16,NOTCH3,LYN,C1QA,SFRP1,SFRP4,NTN4,PDE3A,IL7R,CHRDL1,STA…
GO:BP	multicellular organism development	GO:0007275	FALSE	4.44228e-06	5.35239	4643	136	61	21031	PREX2,SEMA3A,ITGB8,PTPRB,FGF10,EMCN,BCL11B,SLC8A1,CALCRL,RTN1,MFAP5,SEMA5A,PCSK6,TNXB,ABI3BP,SEMA3C,COL5A2,RHOJ,NEGR1,THBS2,SNTG2,CRTAC1,GJB2,ADGRB3,ITGAX,ADAMTS9,IGF1,AFF3,STOX2,VEGFC,ADAMTSL1,POSTN,CTLA4,PTGIS,ADAMTS5,EDNRA,CD86,SMOC1,PCDH17,PRKCQ,COL6A1,MERTK,EFNA5,ABCC9,BMP6,ASPN,PADI2,PI16,NOTCH3,LYN,C1QA,SFRP1,SFRP4,NTN4,IL7R,CHRDL1,STAP1,ENPP1,EDA,BICC1,COL4A1
GO:BP	regulation of response to stimulus	GO:0048583	FALSE	5.14888e-06	5.28829	3939	136	55	21031	PREX2,SEMA3A,FCER1A,MS4A1,VWF,CD79A,FGF10,BANK1,RBM47,MCTP1,SEMA5A,CD1C,CCL5,BLK,FLT3,SKAP1,PCSK6,LMCD1,SLC11A1,TNXB,SEMA3C,MARCO,IGF1,VEGFC,POSTN,CTLA4,THEMIS,PTGIS,GPC6,CD86,RGS5,CNKSR3,PRKCQ,BMP6,MZB1,ASPN,PADI2,PI16,LYN,C1QA,SFRP1,SFRP4,NUAK1,PDE3A,IL7R,GPAT3,CHRDL1,STAP1,ENPP1,DNASE1L3,EDA,BICC1,IL1R2,MMRN1,DPP4
GO:BP	response to organic substance	GO:0010033	FALSE	6.78702e-06	5.16832	2637	136	43	21031	FGF10,RBM47,SLC8A1,CALCRL,CCL5,FLT3,SLC11A1,COL5A2,ME1,AQP9,GJB2,MSR1,IGF1,AFF3,VEGFC,RAB31,POSTN,PTGIS,EDNRA,CD86,PRKCQ,COL6A1,MRC1,EFNA5,ABCC9,FOLR2,BMP6,MZB1,PADI2,LYN,PLVAP,SFRP1,SFRP4,ST18,PDE3A,IL7R,ACKR1,STAP1,ENPP1,PCOLCE2,EDA,COL4A1,IL1R2
GO:BP	developmental process	GO:0032502	FALSE	1.14672e-05	4.94054	6453	136	74	21031	PREX2,SEMA3A,ITGB8,MS4A1,CD79A,PTPRB,FGF10,EMCN,RBM47,BCL11B,SLC8A1,CALCRL,RTN1,MFAP5,SEMA5A,BLK,FLT3,PCSK6,TNXB,ABI3BP,SEMA3C,COL5A2,RHOJ,NEGR1,THBS2,SNTG2,CRTAC1,GJB2,ADGRB3,ITGAX,MSR1,ADAMTS9,IGF1,AFF3,STOX2,VEGFC,ADAMTSL1,POSTN,CTLA4,THEMIS,TANC1,POU2AF1,PTGIS,ADAMTS5,PGM5,EDNRA,CD86,SMOC1,PCDH17,PRKCQ,COL6A1,MERTK,EFNA5,ABCC9,BMP6,ASPN,PADI2,PI16,NOTCH3,LYN,PLVAP,C1QA,SFRP1,SFRP4,NTN4,PDE3A,…
GO:BP	cellular response to endogenous stimulus	GO:0071495	FALSE	1.22614e-05	4.91146	1432	136	30	21031	ITGB8,FGF10,SLC8A1,CCL5,FLT3,PCSK6,TNXB,COL5A2,AQP9,GJB2,IGF1,VEGFC,RAB31,POSTN,EDNRA,PRKCQ,COL6A1,EFNA5,FOLR2,BMP6,MZB1,ASPN,PADI2,LYN,SFRP1,SFRP4,PDE3A,CHRDL1,ENPP1,COL4A1
GO:BP	cell-substrate adhesion	GO:0031589	FALSE	1.44795e-05	4.83925	351	136	15	21031	ITGB8,VWF,SKAP1,TNXB,ABI3BP,ITGAX,ADAMTS9,FBLN2,POSTN,MERTK,EFNA5,SFRP1,NTN4,EDA,ITGA9
GO:BP	cell differentiation	GO:0030154	FALSE	2.7938e-05	4.5538	4366	136	57	21031	PREX2,SEMA3A,ITGB8,MS4A1,CD79A,PTPRB,FGF10,RBM47,BCL11B,SLC8A1,RTN1,MFAP5,SEMA5A,BLK,FLT3,TNXB,ABI3BP,SEMA3C,COL5A2,NEGR1,CRTAC1,ADGRB3,MSR1,ADAMTS9,IGF1,VEGFC,ADAMTSL1,POSTN,CTLA4,THEMIS,TANC1,POU2AF1,ADAMTS5,PGM5,EDNRA,CD86,SMOC1,PRKCQ,COL6A1,MERTK,EFNA5,BMP6,PI16,NOTCH3,LYN,C1QA,SFRP1,SFRP4,NTN4,PDE3A,IL7R,CHRDL1,STAP1,ENPP1,DNASE1L3,EDA,COL4A1
GO:BP	cellular developmental process	GO:0048869	FALSE	2.81776e-05	4.5501	4367	136	57	21031	PREX2,SEMA3A,ITGB8,MS4A1,CD79A,PTPRB,FGF10,RBM47,BCL11B,SLC8A1,RTN1,MFAP5,SEMA5A,BLK,FLT3,TNXB,ABI3BP,SEMA3C,COL5A2,NEGR1,CRTAC1,ADGRB3,MSR1,ADAMTS9,IGF1,VEGFC,ADAMTSL1,POSTN,CTLA4,THEMIS,TANC1,POU2AF1,ADAMTS5,PGM5,EDNRA,CD86,SMOC1,PRKCQ,COL6A1,MERTK,EFNA5,BMP6,PI16,NOTCH3,LYN,C1QA,SFRP1,SFRP4,NTN4,PDE3A,IL7R,CHRDL1,STAP1,ENPP1,DNASE1L3,EDA,COL4A1
GO:BP	cellular response to chemical stimulus	GO:0070887	FALSE	3.6797e-05	4.43419	2683	136	42	21031	RBM47,SLC8A1,CALCRL,SEMA5A,CCL5,FLT3,SLC11A1,COL5A2,AQP9,SLCO2B1,GJB2,MSR1,IGF1,VEGFC,RAB31,POSTN,PTGIS,EDNRA,CD86,PRKCQ,COL6A1,MRC1,EFNA5,FOLR2,BMP6,MZB1,PADI2,LYN,PLVAP,SFRP1,ST18,PDE3A,IL7R,ACKR1,STAP1,ENPP1,PCOLCE2,EDA,COL4A1,ITGA9,IL1R2,DPP4
GO:BP	regulation of cell adhesion	GO:0030155	FALSE	4.66623e-05	4.33103	778	136	21	21031	EMCN,SEMA5A,CCL5,SKAP1,TNXB,ABI3BP,MAGI1,IGF1,FBLN2,POSTN,CTLA4,CD86,PRKCQ,EFNA5,BMP6,LYN,SFRP1,NUAK1,IL7R,MMRN1,DPP4
GO:BP	response to external stimulus	GO:0009605	FALSE	5.64743e-05	4.24815	2723	136	42	21031	SEMA3A,ITGB8,MS4A1,FGF10,BANK1,RBM47,SLC8A1,SEMA5A,CCL5,BLK,SLC11A1,SEMA3C,MARCO,WDFY4,GJB2,ITGAX,ADAMTS9,IGF1,VEGFC,POSTN,POU2AF1,PTGIS,ADAMTS5,CD86,PRKCQ,MRC1,EFNA5,ABCC9,FOLR2,BMP6,PADI2,LYN,C1QA,SFRP1,NUAK1,IL7R,SLAMF7,STAP1,DNASE1L3,ITGA9,MMRN1,DPP4
GO:BP	regulation of biological process	GO:0050789	FALSE	9.60496e-05	4.0175	12287	136	109	21031	PREX2,SEMA3A,ITGB8,FCER1A,MS4A1,VWF,CD79A,FGF10,ADGRL4,BANK1,EMCN,RBM47,BCL11B,RAPGEF4,SLC8A1,CALCRL,RTN1,MCTP1,SEMA5A,ADGRL2,CD1C,CCL5,BLK,FLT3,SKAP1,PKIB,PCSK6,LMCD1,SLC11A1,TNXB,ABI3BP,SEMA3C,COL5A2,RHOJ,ITGBL1,ZNF385B,MARCO,NEGR1,ME1,THBS2,PARM1,MYRIP,MAGI1,GJB2,ADGRB3,ITGAX,MSR1,ADAMTS9,IGF1,RALGPS2,AFF3,STOX2,VEGFC,FBLN2,RAB31,POSTN,CTLA4,THEMIS,TANC1,POU2AF1,PTGIS,ADAMTS5,GPC6,EDNRA,CD86,R…
GO:BP	circulatory system development	GO:0072359	FALSE	9.63733e-05	4.01604	1130	136	25	21031	ITGB8,PTPRB,FGF10,EMCN,SLC8A1,CALCRL,SEMA5A,ABI3BP,SEMA3C,RHOJ,THBS2,ADGRB3,ITGAX,ADAMTS9,IGF1,VEGFC,PTGIS,ADAMTS5,EDNRA,ABCC9,PI16,NOTCH3,SFRP1,BICC1,COL4A1
GO:BP	regulation of cell communication	GO:0010646	FALSE	9.69529e-05	4.01344	3443	136	48	21031	PREX2,SEMA3A,ITGB8,VWF,FGF10,BANK1,RBM47,RAPGEF4,SLC8A1,MCTP1,SEMA5A,CCL5,BLK,FLT3,PCSK6,LMCD1,TNXB,MARCO,MYRIP,IGF1,VEGFC,POSTN,PTGIS,GPC6,CD86,RGS5,CNKSR3,PCDH17,PRKCQ,EFNA5,BMP6,MZB1,ASPN,PADI2,LYN,SFRP1,SFRP4,NUAK1,PDE3A,IL7R,GPAT3,CHRDL1,STAP1,ENPP1,EDA,BICC1,IL1R2,PLCB4
GO:BP	biological regulation	GO:0065007	FALSE	0.000112952	3.94711	12680	136	111	21031	PREX2,SEMA3A,ITGB8,FCER1A,MS4A1,VWF,CD79A,FGF10,ADGRL4,F13A1,BANK1,EMCN,RBM47,BCL11B,RAPGEF4,SLC8A1,CALCRL,RTN1,MCTP1,SEMA5A,ADGRL2,CD1C,CCL5,BLK,FLT3,SKAP1,PKIB,PCSK6,LMCD1,SLC11A1,TNXB,ABI3BP,SEMA3C,COL5A2,RHOJ,ITGBL1,ZNF385B,MARCO,NEGR1,ME1,THBS2,PARM1,MYRIP,MAGI1,GJB2,ADGRB3,ITGAX,MSR1,ADAMTS9,IGF1,RALGPS2,AFF3,STOX2,VEGFC,FBLN2,RAB31,POSTN,CTLA4,THEMIS,TANC1,POU2AF1,PTGIS,ADAMTS5,DMXL2,GPC6,…
GO:BP	response to endogenous stimulus	GO:0009719	FALSE	0.000119375	3.92309	1678	136	31	21031	ITGB8,FGF10,SLC8A1,CCL5,FLT3,PCSK6,TNXB,COL5A2,ME1,AQP9,GJB2,IGF1,VEGFC,RAB31,POSTN,EDNRA,PRKCQ,COL6A1,EFNA5,FOLR2,BMP6,MZB1,ASPN,PADI2,LYN,SFRP1,SFRP4,PDE3A,CHRDL1,ENPP1,COL4A1
GO:BP	angiogenesis	GO:0001525	FALSE	0.000119793	3.92157	538	136	17	21031	ITGB8,PTPRB,FGF10,EMCN,CALCRL,SEMA5A,RHOJ,THBS2,ADGRB3,ITGAX,ADAMTS9,VEGFC,PTGIS,EDNRA,NOTCH3,SFRP1,COL4A1
GO:BP	system development	GO:0048731	FALSE	0.000166147	3.77951	3973	136	52	21031	PREX2,SEMA3A,ITGB8,PTPRB,FGF10,EMCN,BCL11B,SLC8A1,CALCRL,RTN1,MFAP5,SEMA5A,TNXB,ABI3BP,SEMA3C,COL5A2,RHOJ,NEGR1,THBS2,SNTG2,CRTAC1,ADGRB3,ITGAX,ADAMTS9,IGF1,VEGFC,ADAMTSL1,POSTN,PTGIS,ADAMTS5,EDNRA,SMOC1,PCDH17,PRKCQ,MERTK,EFNA5,ABCC9,BMP6,PADI2,PI16,NOTCH3,LYN,C1QA,SFRP1,SFRP4,NTN4,IL7R,CHRDL1,STAP1,EDA,BICC1,COL4A1
GO:BP	lymphocyte proliferation	GO:0046651	FALSE	0.000172497	3.76322	308	136	13	21031	MS4A1,CD79A,FGF10,CCL5,FLT3,SLC11A1,IGF1,CTLA4,CD86,PRKCQ,MZB1,LYN,IL7R
GO:BP	mononuclear cell proliferation	GO:0032943	FALSE	0.000223636	3.65046	315	136	13	21031	MS4A1,CD79A,FGF10,CCL5,FLT3,SLC11A1,IGF1,CTLA4,CD86,PRKCQ,MZB1,LYN,IL7R
GO:BP	regulation of signaling	GO:0023051	FALSE	0.000259808	3.58535	3437	136	47	21031	PREX2,SEMA3A,ITGB8,VWF,FGF10,BANK1,RBM47,RAPGEF4,MCTP1,SEMA5A,CCL5,BLK,FLT3,PCSK6,LMCD1,TNXB,MARCO,MYRIP,IGF1,VEGFC,POSTN,PTGIS,GPC6,CD86,RGS5,CNKSR3,PCDH17,PRKCQ,EFNA5,BMP6,MZB1,ASPN,PADI2,LYN,SFRP1,SFRP4,NUAK1,PDE3A,IL7R,GPAT3,CHRDL1,STAP1,ENPP1,EDA,BICC1,IL1R2,PLCB4
GO:BP	blood vessel development	GO:0001568	FALSE	0.000330284	3.48111	721	136	19	21031	ITGB8,PTPRB,FGF10,EMCN,CALCRL,SEMA5A,SEMA3C,RHOJ,THBS2,ADGRB3,ITGAX,ADAMTS9,VEGFC,PTGIS,EDNRA,ABCC9,NOTCH3,SFRP1,COL4A1
GO:BP	positive regulation of immune system process	GO:0002684	FALSE	0.000449759	3.34702	1054	136	23	21031	MS4A1,CD79A,FGF10,BANK1,RBM47,CD1C,CCL5,BLK,SKAP1,SLC11A1,IGF1,VEGFC,CTLA4,THEMIS,CD86,PRKCQ,MZB1,LYN,PLVAP,C1QA,IL7R,STAP1,DPP4
GO:BP	B cell activation	GO:0042113	FALSE	0.000481022	3.31783	281	136	12	21031	MS4A1,CD79A,BANK1,FLT3,FCRL1,CTLA4,POU2AF1,CD86,MZB1,LYN,SFRP1,IL7R
GO:BP	regulation of immune system process	GO:0002682	FALSE	0.000558922	3.25265	1512	136	28	21031	FCER1A,MS4A1,CD79A,FGF10,BANK1,RBM47,CD1C,CCL5,BLK,SKAP1,SLC11A1,IGF1,VEGFC,CTLA4,THEMIS,CD86,PRKCQ,MERTK,MZB1,PADI2,LYN,PLVAP,C1QA,SFRP1,IL7R,STAP1,DNASE1L3,DPP4
GO:BP	regulation of biological quality	GO:0065008	FALSE	0.000576637	3.2391	2846	136	41	21031	SEMA3A,VWF,FGF10,F13A1,RBM47,RAPGEF4,SLC8A1,MCTP1,SEMA5A,CCL5,BLK,PCSK6,SLC11A1,SEMA3C,RHOJ,NEGR1,THBS2,MYRIP,ADGRB3,IGF1,VEGFC,POSTN,TANC1,DMXL2,GPC6,EDNRA,PRKCQ,MERTK,EFNA5,ABCC9,BMP6,LYN,PLVAP,SFRP1,BACE2,PDE3A,IL7R,CHRDL1,ITGA9,MMRN1,DPP4
GO:BP	B cell receptor signaling pathway	GO:0050853	TRUE	0.000615237	3.21096	71	136	7	21031	MS4A1,CD79A,BANK1,BLK,CTLA4,LYN,STAP1
GO:BP	vasculature development	GO:0001944	FALSE	0.000627573	3.20234	752	136	19	21031	ITGB8,PTPRB,FGF10,EMCN,CALCRL,SEMA5A,SEMA3C,RHOJ,THBS2,ADGRB3,ITGAX,ADAMTS9,VEGFC,PTGIS,EDNRA,ABCC9,NOTCH3,SFRP1,COL4A1
GO:BP	leukocyte proliferation	GO:0070661	FALSE	0.000769619	3.11372	351	136	13	21031	MS4A1,CD79A,FGF10,CCL5,FLT3,SLC11A1,IGF1,CTLA4,CD86,PRKCQ,MZB1,LYN,IL7R
GO:BP	anatomical structure formation involved in morphogenesis	GO:0048646	FALSE	0.000894502	3.04842	1183	136	24	21031	ITGB8,PTPRB,FGF10,EMCN,CALCRL,SEMA5A,SEMA3C,COL5A2,RHOJ,THBS2,ADGRB3,ITGAX,ADAMTS9,VEGFC,TANC1,PTGIS,ADAMTS5,PGM5,EDNRA,COL6A1,NOTCH3,SFRP1,EDA,COL4A1
GO:BP	blood vessel morphogenesis	GO:0048514	FALSE	0.000988891	3.00485	625	136	17	21031	ITGB8,PTPRB,FGF10,EMCN,CALCRL,SEMA5A,RHOJ,THBS2,ADGRB3,ITGAX,ADAMTS9,VEGFC,PTGIS,EDNRA,NOTCH3,SFRP1,COL4A1
GO:BP	anatomical structure morphogenesis	GO:0009653	FALSE	0.00100153	2.99933	2684	136	39	21031	PREX2,SEMA3A,ITGB8,PTPRB,FGF10,EMCN,BCL11B,CALCRL,MFAP5,SEMA5A,SEMA3C,COL5A2,RHOJ,THBS2,ADGRB3,ITGAX,ADAMTS9,AFF3,VEGFC,ADAMTSL1,POSTN,TANC1,PTGIS,ADAMTS5,PGM5,EDNRA,PRKCQ,COL6A1,EFNA5,ABCC9,BMP6,ASPN,NOTCH3,SFRP1,SFRP4,NTN4,IL7R,EDA,COL4A1
GO:BP	response to chemical	GO:0042221	FALSE	0.00103222	2.98623	3957	136	50	21031	SEMA3A,FGF10,RBM47,SLC8A1,CALCRL,SEMA5A,CCL5,FLT3,SLC11A1,SEMA3C,COL5A2,ME1,AQP9,SLCO2B1,GJB2,MSR1,IGF1,AFF3,VEGFC,RAB31,POSTN,PTGIS,EDNRA,CD86,PRKCQ,COL6A1,MRC1,EFNA5,ABCC9,FOLR2,BMP6,MZB1,ASPN,PADI2,LYN,PLVAP,SFRP1,SFRP4,ST18,PDE3A,IL7R,ACKR1,STAP1,ENPP1,PCOLCE2,EDA,COL4A1,ITGA9,IL1R2,DPP4
GO:BP	cell migration	GO:0016477	FALSE	0.00155611	2.80796	1496	136	27	21031	SEMA3A,PTPRB,FGF10,BCL11B,MCTP1,SEMA5A,CCL5,TNXB,SEMA3C,RHOJ,ITGAX,ADAMTS9,IGF1,VEGFC,POSTN,GPC6,EDNRA,PRKCQ,MERTK,PADI2,LYN,PLVAP,SFRP1,NTN4,STAP1,ITGA9,DPP4
GO:BP	cell adhesion mediated by integrin	GO:0033627	FALSE	0.00165797	2.78042	82	136	7	21031	CCL5,SKAP1,ITGAX,LYN,ITGA9,MMRN1,DPP4
GO:BP	regulation of cellular process	GO:0050794	FALSE	0.00169532	2.77075	11738	136	103	21031	PREX2,SEMA3A,ITGB8,FCER1A,MS4A1,VWF,CD79A,FGF10,ADGRL4,BANK1,EMCN,RBM47,BCL11B,RAPGEF4,SLC8A1,CALCRL,MCTP1,SEMA5A,ADGRL2,CD1C,CCL5,BLK,FLT3,SKAP1,PKIB,PCSK6,LMCD1,SLC11A1,TNXB,ABI3BP,SEMA3C,COL5A2,RHOJ,ITGBL1,ZNF385B,MARCO,NEGR1,ME1,THBS2,PARM1,MYRIP,MAGI1,ADGRB3,ITGAX,MSR1,ADAMTS9,IGF1,RALGPS2,AFF3,STOX2,VEGFC,FBLN2,RAB31,POSTN,CTLA4,THEMIS,TANC1,POU2AF1,PTGIS,GPC6,EDNRA,CD86,RGS5,CNKSR3,SMOC1,P…
GO:BP	enzyme-linked receptor protein signaling pathway	GO:0007167	FALSE	0.00171288	2.76627	967	136	21	21031	ITGB8,FGF10,BLK,FLT3,PCSK6,TNXB,IGF1,VEGFC,PRKCQ,MERTK,EFNA5,BMP6,MZB1,ASPN,LYN,SFRP1,SFRP4,CHRDL1,STAP1,ENPP1,COL4A1
GO:BP	positive regulation of biological process	GO:0048518	FALSE	0.00200499	2.69789	6250	136	67	21031	SEMA3A,ITGB8,MS4A1,VWF,CD79A,FGF10,BANK1,RBM47,BCL11B,RAPGEF4,SLC8A1,CALCRL,SEMA5A,CD1C,CCL5,BLK,FLT3,SKAP1,PKIB,LMCD1,SLC11A1,TNXB,ABI3BP,SEMA3C,RHOJ,MARCO,NEGR1,THBS2,PARM1,MYRIP,MAGI1,ADGRB3,ITGAX,MSR1,ADAMTS9,IGF1,VEGFC,FBLN2,RAB31,POSTN,CTLA4,THEMIS,POU2AF1,PTGIS,EDNRA,CD86,CNKSR3,PRKCQ,MERTK,EFNA5,FOLR2,BMP6,MZB1,PADI2,NOTCH3,LYN,PLVAP,C1QA,SFRP1,SFRP4,ST18,PDE3A,IL7R,STAP1,EDA,MMRN1,DPP4
GO:BP	extracellular matrix organization	GO:0030198	TRUE	0.00216736	2.66407	324	136	12	21031	COL22A1,TNXB,ABI3BP,COL5A2,ADAMTS9,ADAMTSL1,POSTN,ADAMTS5,SMOC1,NTN4,COL4A1,DPP4
GO:BP	extracellular structure organization	GO:0043062	FALSE	0.00223817	2.65011	325	136	12	21031	COL22A1,TNXB,ABI3BP,COL5A2,ADAMTS9,ADAMTSL1,POSTN,ADAMTS5,SMOC1,NTN4,COL4A1,DPP4
GO:BP	external encapsulating structure organization	GO:0045229	FALSE	0.00231103	2.6362	326	136	12	21031	COL22A1,TNXB,ABI3BP,COL5A2,ADAMTS9,ADAMTSL1,POSTN,ADAMTS5,SMOC1,NTN4,COL4A1,DPP4
GO:BP	cellular response to oxygen-containing compound	GO:1901701	FALSE	0.0031074	2.5076	1179	136	23	21031	SLC8A1,CALCRL,COL5A2,AQP9,GJB2,IGF1,RAB31,POSTN,EDNRA,CD86,PRKCQ,COL6A1,MRC1,EFNA5,FOLR2,BMP6,MZB1,LYN,SFRP1,PDE3A,STAP1,ENPP1,COL4A1
GO:BP	regulation of chemotaxis	GO:0050920	FALSE	0.00327216	2.48517	224	136	10	21031	SEMA3A,FGF10,SEMA5A,CCL5,SEMA3C,VEGFC,PADI2,LYN,STAP1,DPP4
GO:BP	cell development	GO:0048468	FALSE	0.00345965	2.46097	2819	136	39	21031	PREX2,SEMA3A,ITGB8,MS4A1,CD79A,RBM47,BCL11B,SLC8A1,MFAP5,SEMA5A,FLT3,TNXB,SEMA3C,NEGR1,CRTAC1,ADGRB3,IGF1,VEGFC,ADAMTSL1,POSTN,CTLA4,THEMIS,POU2AF1,PGM5,EDNRA,CD86,PRKCQ,MERTK,EFNA5,BMP6,PI16,NOTCH3,LYN,C1QA,SFRP1,NTN4,PDE3A,IL7R,DNASE1L3
GO:BP	cellular response to organonitrogen compound	GO:0071417	FALSE	0.00347433	2.45913	610	136	16	21031	SLC8A1,COL5A2,AQP9,GJB2,IGF1,RAB31,EDNRA,PRKCQ,COL6A1,FOLR2,MZB1,LYN,SFRP1,PDE3A,ENPP1,COL4A1
GO:BP	neuron remodeling	GO:0016322	TRUE	0.00348516	2.45778	15	136	4	21031	ADGRB3,EDNRA,C1QA,NTN4
GO:BP	response to cytokine	GO:0034097	FALSE	0.00381867	2.41809	932	136	20	21031	RBM47,CCL5,FLT3,SLC11A1,AFF3,VEGFC,POSTN,PTGIS,MRC1,PADI2,LYN,PLVAP,SFRP1,ST18,IL7R,ACKR1,STAP1,PCOLCE2,EDA,IL1R2
GO:BP	cell-cell adhesion	GO:0098609	FALSE	0.00478404	2.32021	946	136	20	21031	EMCN,CCL5,SKAP1,TNXB,NEGR1,MAGI1,ITGAX,OLR1,IGF1,CTLA4,CD86,PCDH17,PRKCQ,EFNA5,BMP6,LYN,IL7R,ITGA9,MMRN1,DPP4
GO:BP	negative regulation of chemotaxis	GO:0050922	FALSE	0.00482111	2.31685	62	136	6	21031	SEMA3A,SEMA5A,SEMA3C,PADI2,STAP1,DPP4
GO:BP	positive regulation of cellular process	GO:0048522	FALSE	0.00497039	2.30361	5717	136	62	21031	SEMA3A,ITGB8,MS4A1,VWF,FGF10,BANK1,RBM47,BCL11B,RAPGEF4,CALCRL,SEMA5A,CD1C,CCL5,BLK,FLT3,SKAP1,PKIB,LMCD1,SLC11A1,TNXB,ABI3BP,SEMA3C,RHOJ,MARCO,NEGR1,THBS2,PARM1,MYRIP,MAGI1,ADGRB3,ITGAX,MSR1,ADAMTS9,IGF1,VEGFC,FBLN2,RAB31,POSTN,CTLA4,POU2AF1,PTGIS,EDNRA,CD86,PRKCQ,MERTK,EFNA5,FOLR2,BMP6,MZB1,PADI2,NOTCH3,LYN,PLVAP,SFRP1,SFRP4,ST18,PDE3A,IL7R,STAP1,EDA,MMRN1,DPP4
GO:BP	cell-matrix adhesion	GO:0007160	FALSE	0.0050254	2.29883	235	136	10	21031	ITGB8,SKAP1,TNXB,ITGAX,ADAMTS9,POSTN,EFNA5,SFRP1,EDA,ITGA9
GO:BP	cell population proliferation	GO:0008283	FALSE	0.0057026	2.24393	2006	136	31	21031	MS4A1,CD79A,FGF10,BCL11B,CALCRL,SEMA5A,CCL5,FLT3,SLC11A1,TNXB,ABI3BP,ITGAX,IGF1,VEGFC,CTLA4,EDNRA,CD86,PRKCQ,ABCC9,PDE1A,FOLR2,BMP6,MZB1,NOTCH3,LYN,SFRP1,SFRP4,ST18,NUAK1,IL7R,DPP4
GO:BP	regulation of multicellular organismal development	GO:2000026	FALSE	0.00586197	2.23196	1411	136	25	21031	SEMA3A,ITGB8,FGF10,SLC8A1,SEMA5A,SEMA3C,RHOJ,THBS2,ADGRB3,ITGAX,ADAMTS9,IGF1,VEGFC,CTLA4,PTGIS,CD86,EFNA5,BMP6,ASPN,PI16,LYN,SFRP1,SFRP4,IL7R,ENPP1
GO:BP	antigen receptor-mediated signaling pathway	GO:0050851	FALSE	0.00696847	2.15686	191	136	9	21031	MS4A1,CD79A,BANK1,BLK,SKAP1,CTLA4,THEMIS,LYN,STAP1
GO:BP	animal organ development	GO:0048513	FALSE	0.00849823	2.07067	3039	136	40	21031	SEMA3A,ITGB8,FGF10,BCL11B,SLC8A1,CALCRL,RTN1,MFAP5,SEMA5A,FLT3,TNXB,ABI3BP,SEMA3C,COL5A2,RHOJ,GJB2,ITGAX,ADAMTS9,IGF1,STOX2,VEGFC,ADAMTS5,EDNRA,SMOC1,MERTK,ABCC9,BMP6,ASPN,PADI2,PI16,NOTCH3,SFRP1,SFRP4,NTN4,IL7R,CHRDL1,ENPP1,EDA,BICC1,COL4A1
GO:BP	negative regulation of response to stimulus	GO:0048585	FALSE	0.00966488	2.0148	1648	136	27	21031	SEMA3A,FGF10,BANK1,MCTP1,SEMA5A,CCL5,SEMA3C,IGF1,PTGIS,RGS5,CNKSR3,PRKCQ,ASPN,PADI2,LYN,SFRP1,SFRP4,NUAK1,PDE3A,IL7R,CHRDL1,STAP1,ENPP1,BICC1,IL1R2,MMRN1,DPP4
GO:BP	response to oxygen-containing compound	GO:1901700	FALSE	0.0114168	1.94246	1663	136	27	21031	FGF10,SLC8A1,CALCRL,SLC11A1,COL5A2,ME1,AQP9,GJB2,IGF1,RAB31,POSTN,EDNRA,CD86,PRKCQ,COL6A1,MRC1,EFNA5,ABCC9,FOLR2,BMP6,MZB1,LYN,SFRP1,PDE3A,STAP1,ENPP1,COL4A1
GO:BP	peptidyl-tyrosine phosphorylation	GO:0018108	TRUE	0.0114767	1.94018	258	136	10	21031	FGF10,BANK1,CCL5,BLK,FLT3,IGF1,EFNA5,BMP6,LYN,SFRP1
GO:BP	cellular response to nitrogen compound	GO:1901699	FALSE	0.0118694	1.92557	672	136	16	21031	SLC8A1,COL5A2,AQP9,GJB2,IGF1,RAB31,EDNRA,PRKCQ,COL6A1,FOLR2,MZB1,LYN,SFRP1,PDE3A,ENPP1,COL4A1
GO:BP	peptidyl-tyrosine modification	GO:0018212	FALSE	0.0122805	1.91079	260	136	10	21031	FGF10,BANK1,CCL5,BLK,FLT3,IGF1,EFNA5,BMP6,LYN,SFRP1
GO:BP	import into cell	GO:0098657	TRUE	0.0126985	1.89625	923	136	19	21031	MS4A1,CD163,SLC8A1,CALCRL,MCTP1,SLC11A1,RHOJ,MARCO,MSR1,OLR1,RAB31,MERTK,MRC1,ABCC9,LYN,SFRP4,STAP1,ENPP1,DPP4
GO:BP	cellular response to cytokine stimulus	GO:0071345	FALSE	0.0128784	1.89014	839	136	18	21031	RBM47,CCL5,FLT3,VEGFC,POSTN,PTGIS,MRC1,PADI2,LYN,PLVAP,SFRP1,ST18,IL7R,ACKR1,STAP1,PCOLCE2,EDA,IL1R2
GO:BP	immune response	GO:0006955	FALSE	0.0136602	1.86454	1988	136	30	21031	ITGB8,FCER1A,MS4A1,CD79A,BANK1,RBM47,RAPGEF4,CD1C,CCL5,BLK,SKAP1,SLC11A1,SEMA3C,MARCO,CTLA4,THEMIS,POU2AF1,CD86,PRKCQ,MRC1,BMP6,LYN,C1QA,IL7R,SLAMF7,STAP1,ENPP1,DNASE1L3,EDA,IL1R2
GO:BP	regulation of cell migration	GO:0030334	FALSE	0.0150135	1.82352	934	136	19	21031	SEMA3A,FGF10,MCTP1,SEMA5A,CCL5,TNXB,SEMA3C,RHOJ,ITGAX,ADAMTS9,IGF1,VEGFC,POSTN,PADI2,LYN,PLVAP,SFRP1,STAP1,DPP4
GO:BP	immune response-regulating cell surface receptor signaling pathway	GO:0002768	FALSE	0.0151546	1.81945	327	136	11	21031	FCER1A,MS4A1,CD79A,BANK1,BLK,SKAP1,CTLA4,THEMIS,PRKCQ,LYN,STAP1
GO:BP	chemotaxis	GO:0006935	FALSE	0.0161223	1.79257	463	136	13	21031	SEMA3A,FGF10,SEMA5A,CCL5,SEMA3C,VEGFC,PRKCQ,EFNA5,PADI2,LYN,STAP1,ITGA9,DPP4
GO:BP	taxis	GO:0042330	FALSE	0.0168783	1.77267	465	136	13	21031	SEMA3A,FGF10,SEMA5A,CCL5,SEMA3C,VEGFC,PRKCQ,EFNA5,PADI2,LYN,STAP1,ITGA9,DPP4
GO:BP	regulation of signal transduction	GO:0009966	FALSE	0.0170305	1.76877	3010	136	39	21031	PREX2,SEMA3A,VWF,FGF10,BANK1,RBM47,SEMA5A,CCL5,FLT3,PCSK6,LMCD1,TNXB,MARCO,IGF1,VEGFC,POSTN,PTGIS,GPC6,CD86,RGS5,CNKSR3,PRKCQ,BMP6,MZB1,ASPN,PADI2,LYN,SFRP1,SFRP4,NUAK1,PDE3A,IL7R,GPAT3,CHRDL1,STAP1,ENPP1,EDA,BICC1,IL1R2
GO:BP	regulation of cell activation	GO:0050865	FALSE	0.0179213	1.74663	616	136	15	21031	FGF10,BANK1,CCL5,IGF1,CTLA4,CD86,PRKCQ,MERTK,MZB1,LYN,SFRP1,IL7R,STAP1,MMRN1,DPP4
GO:BP	positive regulation of peptidyl-tyrosine phosphorylation	GO:0050731	FALSE	0.017957	1.74577	163	136	8	21031	FGF10,BANK1,CCL5,FLT3,IGF1,EFNA5,BMP6,LYN
GO:BP	cell motility	GO:0048870	FALSE	0.0187644	1.72667	1709	136	27	21031	SEMA3A,PTPRB,FGF10,BCL11B,MCTP1,SEMA5A,CCL5,TNXB,SEMA3C,RHOJ,ITGAX,ADAMTS9,IGF1,VEGFC,POSTN,GPC6,EDNRA,PRKCQ,MERTK,PADI2,LYN,PLVAP,SFRP1,NTN4,STAP1,ITGA9,DPP4
GO:BP	regulation of developmental process	GO:0050793	FALSE	0.0189114	1.72328	2455	136	34	21031	SEMA3A,ITGB8,FGF10,BCL11B,SLC8A1,SEMA5A,TNXB,ABI3BP,SEMA3C,COL5A2,RHOJ,THBS2,ADGRB3,ITGAX,MSR1,ADAMTS9,IGF1,VEGFC,CTLA4,PTGIS,CD86,SMOC1,EFNA5,BMP6,ASPN,PI16,NOTCH3,LYN,SFRP1,SFRP4,NTN4,PDE3A,IL7R,ENPP1
GO:BP	negative chemotaxis	GO:0050919	FALSE	0.0208926	1.68001	47	136	5	21031	SEMA3A,SEMA5A,SEMA3C,EFNA5,DPP4
GO:BP	endocytosis	GO:0006897	FALSE	0.0211491	1.67471	704	136	16	21031	CD163,CALCRL,MCTP1,SLC11A1,RHOJ,MARCO,MSR1,OLR1,RAB31,MERTK,MRC1,LYN,SFRP4,STAP1,ENPP1,DPP4
GO:BP	tube morphogenesis	GO:0035239	FALSE	0.0216946	1.66365	872	136	18	21031	ITGB8,PTPRB,FGF10,EMCN,CALCRL,SEMA5A,RHOJ,THBS2,ADGRB3,ITGAX,ADAMTS9,VEGFC,PTGIS,EDNRA,NOTCH3,SFRP1,EDA,COL4A1
GO:BP	regulation of peptidyl-tyrosine phosphorylation	GO:0050730	FALSE	0.0217928	1.66169	220	136	9	21031	FGF10,BANK1,CCL5,FLT3,IGF1,EFNA5,BMP6,LYN,SFRP1
GO:BP	positive regulation of cell adhesion	GO:0045785	FALSE	0.0221059	1.65549	477	136	13	21031	CCL5,SKAP1,ABI3BP,MAGI1,IGF1,FBLN2,CD86,PRKCQ,LYN,SFRP1,IL7R,MMRN1,DPP4
GO:BP	regulation of cell-cell adhesion	GO:0022407	FALSE	0.0221059	1.65549	477	136	13	21031	CCL5,SKAP1,MAGI1,IGF1,CTLA4,CD86,PRKCQ,EFNA5,BMP6,LYN,IL7R,MMRN1,DPP4
GO:BP	locomotion	GO:0040011	FALSE	0.022282	1.65205	1234	136	22	21031	SEMA3A,FGF10,MCTP1,SEMA5A,CCL5,TNXB,SEMA3C,RHOJ,ITGAX,ADAMTS9,IGF1,VEGFC,POSTN,PRKCQ,EFNA5,PADI2,LYN,PLVAP,SFRP1,STAP1,ITGA9,DPP4
GO:BP	positive regulation of cell population proliferation	GO:0008284	FALSE	0.0227183	1.64362	962	136	19	21031	FGF10,CALCRL,SEMA5A,CCL5,FLT3,TNXB,ITGAX,IGF1,VEGFC,CD86,PRKCQ,FOLR2,BMP6,MZB1,NOTCH3,LYN,SFRP1,IL7R,DPP4
GO:BP	T cell activation	GO:0042110	FALSE	0.0242094	1.61602	555	136	14	21031	BCL11B,CD1C,CCL5,SLC11A1,WDFY4,IGF1,CTLA4,THEMIS,CD86,PRKCQ,LYN,IL7R,SLAMF7,DPP4
GO:BP	regulation of immune response	GO:0050776	FALSE	0.0248939	1.60391	881	136	18	21031	FCER1A,MS4A1,CD79A,BANK1,RBM47,CD1C,CCL5,BLK,SKAP1,SLC11A1,CTLA4,THEMIS,CD86,PRKCQ,LYN,C1QA,IL7R,STAP1
GO:BP	sensory system development	GO:0048880	FALSE	0.0250213	1.60169	412	136	12	21031	SEMA3A,FGF10,BCL11B,MFAP5,COL5A2,RHOJ,SMOC1,MERTK,BMP6,C1QA,CHRDL1,COL4A1
GO:BP	mononuclear cell differentiation	GO:1903131	TRUE	0.0257725	1.58884	484	136	13	21031	ITGB8,MS4A1,CD79A,BCL11B,FLT3,CTLA4,THEMIS,POU2AF1,CD86,MERTK,LYN,SFRP1,IL7R
GO:BP	positive regulation of response to stimulus	GO:0048584	FALSE	0.0267273	1.57304	2274	136	32	21031	SEMA3A,MS4A1,VWF,CD79A,FGF10,BANK1,RBM47,SEMA5A,CD1C,CCL5,BLK,FLT3,SKAP1,LMCD1,SLC11A1,TNXB,MARCO,IGF1,VEGFC,CTLA4,THEMIS,PTGIS,CD86,PRKCQ,BMP6,LYN,C1QA,SFRP1,SFRP4,IL7R,STAP1,EDA
GO:BP	positive regulation of immune response	GO:0050778	FALSE	0.0269362	1.56966	718	136	16	21031	MS4A1,CD79A,BANK1,RBM47,CD1C,CCL5,BLK,SKAP1,SLC11A1,CTLA4,THEMIS,CD86,PRKCQ,LYN,C1QA,STAP1
GO:BP	regulation of leukocyte activation	GO:0002694	FALSE	0.0272814	1.56413	561	136	14	21031	FGF10,BANK1,CCL5,IGF1,CTLA4,CD86,PRKCQ,MERTK,MZB1,LYN,SFRP1,IL7R,STAP1,DPP4
GO:BP	regulation of angiogenesis	GO:0045765	FALSE	0.0298255	1.52541	288	136	10	21031	ITGB8,SEMA5A,RHOJ,THBS2,ADGRB3,ITGAX,ADAMTS9,VEGFC,PTGIS,SFRP1
GO:BP	negative regulation of T cell apoptotic process	GO:0070233	TRUE	0.0307166	1.51263	25	136	4	21031	BCL11B,CCL5,PRKCQ,IL7R
GO:BP	regulation of lymphocyte activation	GO:0051249	FALSE	0.0340208	1.46825	497	136	13	21031	FGF10,BANK1,CCL5,IGF1,CTLA4,CD86,PRKCQ,MERTK,MZB1,LYN,SFRP1,IL7R,DPP4
GO:BP	regulation of vasculature development	GO:1901342	FALSE	0.034569	1.46131	293	136	10	21031	ITGB8,SEMA5A,RHOJ,THBS2,ADGRB3,ITGAX,ADAMTS9,VEGFC,PTGIS,SFRP1
GO:BP	regulation of cell motility	GO:2000145	FALSE	0.036747	1.43478	996	136	19	21031	SEMA3A,FGF10,MCTP1,SEMA5A,CCL5,TNXB,SEMA3C,RHOJ,ITGAX,ADAMTS9,IGF1,VEGFC,POSTN,PADI2,LYN,PLVAP,SFRP1,STAP1,DPP4
GO:BP	tube development	GO:0035295	FALSE	0.0387493	1.41174	1091	136	20	21031	ITGB8,PTPRB,FGF10,EMCN,CALCRL,SEMA5A,SEMA3C,RHOJ,THBS2,GJB2,ADGRB3,ITGAX,ADAMTS9,VEGFC,PTGIS,EDNRA,NOTCH3,SFRP1,EDA,COL4A1
GO:BP	regulation of cell differentiation	GO:0045595	FALSE	0.0392539	1.40612	1576	136	25	21031	SEMA3A,FGF10,BCL11B,SEMA5A,TNXB,ABI3BP,SEMA3C,COL5A2,MSR1,ADAMTS9,IGF1,VEGFC,CTLA4,CD86,SMOC1,EFNA5,BMP6,PI16,NOTCH3,LYN,SFRP1,SFRP4,PDE3A,IL7R,ENPP1
GO:BP	regulation of leukocyte apoptotic process	GO:2000106	TRUE	0.0395109	1.40328	89	136	6	21031	BCL11B,CCL5,PRKCQ,MERTK,LYN,IL7R
GO:BP	regulation of cell population proliferation	GO:0042127	FALSE	0.0414024	1.38297	1683	136	26	21031	FGF10,BCL11B,CALCRL,SEMA5A,CCL5,FLT3,TNXB,ABI3BP,ITGAX,IGF1,VEGFC,CTLA4,CD86,PRKCQ,PDE1A,FOLR2,BMP6,MZB1,NOTCH3,LYN,SFRP1,SFRP4,ST18,NUAK1,IL7R,DPP4
GO:BP	inflammatory response	GO:0006954	TRUE	0.0417758	1.37908	829	136	17	21031	FCER1A,CD163,CCL5,SLC11A1,ABI3BP,OLR1,IGF1,PTGIS,PRKCQ,FOLR2,BMP6,LYN,C1QA,ACKR1,STAP1,DNASE1L3,IL1R2
GO:BP	defense response	GO:0006952	FALSE	0.0432999	1.36351	1791	136	27	21031	FCER1A,RBM47,CD163,CCL5,BLK,SLC11A1,ABI3BP,MARCO,ITGAX,OLR1,IGF1,PTGIS,ADAMTS5,PRKCQ,MRC1,ABCC9,FOLR2,BMP6,LYN,C1QA,IL7R,ACKR1,SLAMF7,STAP1,DNASE1L3,IL1R2,DPP4
GO:BP	negative regulation of leukocyte apoptotic process	GO:2000107	FALSE	0.0454586	1.34238	55	136	5	21031	BCL11B,CCL5,PRKCQ,MERTK,IL7R

## Sheet: SD3
Supplementary Data 3. endothelial private gene enrichment
source	term_name	term_id	highlighted	adjusted_p_value	negative_log10_of_adjusted_p_value	term_size	query_size	intersection_size	effective_domain_size	intersections
GO:BP	chromosome segregation	GO:0007059	TRUE	0.000276498	3.55831	425	101	13	21031	DIAPH3,MKI67,ASPM,TOP2A,TEX14,KNL1,CENPF,BRIP1,CENPM,NDC80,STIL,OIP5,KIF14
GO:BP	cell cycle process	GO:0022402	FALSE	0.00123656	2.90779	1276	101	21	21031	BIN3,DIAPH3,MKI67,CDC14A,ASPM,TOP2A,TEX14,KNL1,CENPF,STMN1,BRIP1,CENPM,EIF4E,CLSPN,CRADD,BCL2,NDC80,STIL,OIP5,KDM8,KIF14
GO:BP	mitotic cell cycle phase transition	GO:0044772	TRUE	0.00241152	2.61771	432	101	12	21031	CDC14A,TEX14,KNL1,CENPF,EIF4E,CLSPN,CRADD,BCL2,NDC80,STIL,KDM8,KIF14
GO:BP	cell cycle	GO:0007049	FALSE	0.00244431	2.61184	1819	101	25	21031	BIN3,DIAPH3,MKI67,CDC14A,ASPM,TOP2A,TEX14,KNL1,CENPF,STMN1,BRIP1,CENPM,EIF4E,CLSPN,CRADD,BCL2,UHRF1,OVOL2,NDC80,MCMDC2,STIL,OIP5,BIRC3,KDM8,KIF14
GO:BP	B cell receptor signaling pathway	GO:0050853	TRUE	0.002554	2.59278	71	101	6	21031	IGLC3,IGHA1,IGHM,VAV3,IGHG1,BCL2
GO:BP	cell cycle phase transition	GO:0044770	FALSE	0.00387105	2.41217	537	101	13	21031	CDC14A,TEX14,KNL1,CENPF,BRIP1,EIF4E,CLSPN,CRADD,BCL2,NDC80,STIL,KDM8,KIF14
GO:BP	immune response-activating cell surface receptor signaling pathway	GO:0002429	FALSE	0.00387513	2.41171	299	101	10	21031	IGLC3,IGHA1,PELI1,IGHM,VAV3,PDE4D,IGHG1,GBP1,BCL2,NR4A3
GO:BP	regulation of response to stimulus	GO:0048583	TRUE	0.00510931	2.29164	3939	101	39	21031	IGLC3,TANK,IGHA1,PELI1,MLLT3,HOMER1,TFRC,ASPM,SESN3,IGHM,VAV3,PDE4D,KNL1,IGHG1,RBPJ,STMN1,RALGAPA2,KLB,GBP1,DUSP16,CRADD,BCL2,FABP4,MAPT,PDE3B,NR4A3,OVOL2,ISG15,DEPDC1B,NDC80,GCH1,PRDM16,CACNG7,HELB,TMEM131L,ARHGAP11B,GRK7,BIRC3,KIF14
GO:BP	antigen receptor-mediated signaling pathway	GO:0050851	FALSE	0.00853835	2.06863	191	101	8	21031	IGLC3,IGHA1,IGHM,VAV3,PDE4D,IGHG1,GBP1,BCL2
GO:BP	immune response-regulating cell surface receptor signaling pathway	GO:0002768	FALSE	0.00860424	2.06529	327	101	10	21031	IGLC3,IGHA1,PELI1,IGHM,VAV3,PDE4D,IGHG1,GBP1,BCL2,NR4A3
GO:BP	regulation of mitotic cell cycle phase transition	GO:1901990	FALSE	0.00983903	2.00705	332	101	10	21031	CDC14A,TEX14,KNL1,CENPF,CLSPN,CRADD,BCL2,NDC80,STIL,KIF14
GO:BP	regulation of mitotic cell cycle	GO:0007346	FALSE	0.0100292	1.99873	496	101	12	21031	MKI67,CDC14A,TEX14,KNL1,CENPF,EIF4E,CLSPN,CRADD,BCL2,NDC80,STIL,KIF14
GO:BP	regulation of cell cycle phase transition	GO:1901987	FALSE	0.0162589	1.78891	433	101	11	21031	CDC14A,TEX14,KNL1,CENPF,BRIP1,CLSPN,CRADD,BCL2,NDC80,STIL,KIF14
GO:BP	cellular response to stimulus	GO:0051716	TRUE	0.021173	1.67422	7394	101	57	21031	IGLC3,TANK,IGHA1,PELI1,MLLT3,DIAPH3,PLCL1,HOMER1,TFRC,ASPM,SESN3,TOP2A,IGHM,VAV3,TEX14,PDE4D,KNL1,IGHG1,NIBAN1,CENPF,RBPJ,STMN1,RALGAPA2,KLB,GBP1,BRIP1,DUSP16,ITGA2B,EIF4E,CLSPN,CRADD,MT1X,HERPUD2,BCL2,FABP4,UHRF1,MAPT,PDE3B,RNASEH2A,CCDC62,NR4A3,OVOL2,ISG15,DEPDC1B,NDC80,GCH1,PRDM16,MCMDC2,CACNG7,STIL,HELB,TMEM131L,GPR19,ARHGAP11B,GRK7,BIRC3,KIF14
GO:BP	mitotic cell cycle process	GO:1903047	FALSE	0.0279144	1.55417	745	101	14	21031	MKI67,CDC14A,TEX14,KNL1,CENPF,STMN1,EIF4E,CLSPN,CRADD,BCL2,NDC80,STIL,KDM8,KIF14
GO:BP	immune response-activating signaling pathway	GO:0002757	FALSE	0.0316681	1.49938	465	101	11	21031	IGLC3,IGHA1,PELI1,IGHM,VAV3,PDE4D,IGHG1,GBP1,BCL2,NR4A3,BIRC3
GO:BP	regulation of signaling	GO:0023051	FALSE	0.0327175	1.48522	3437	101	34	21031	TANK,PELI1,MLLT3,PLCL1,HOMER1,TFRC,ASPM,SESN3,VAV3,PDE4D,KNL1,RNF19A,RBPJ,STMN1,RALGAPA2,KLB,GBP1,DUSP16,EIF4E,CRADD,BCL2,MAPT,PDE3B,OVOL2,ISG15,DEPDC1B,NDC80,PRDM16,CACNG7,TMEM131L,ARHGAP11B,GRK7,BIRC3,KIF14
GO:BP	cell division	GO:0051301	TRUE	0.0335551	1.47424	656	101	13	21031	BIN3,MLLT3,CDC14A,ASPM,TOP2A,TEX14,KNL1,CENPF,STMN1,BRIP1,NDC80,OIP5,KIF14
GO:BP	regulation of cell communication	GO:0010646	FALSE	0.0339798	1.46878	3443	101	34	21031	TANK,PELI1,MLLT3,PLCL1,HOMER1,TFRC,ASPM,SESN3,VAV3,PDE4D,KNL1,RNF19A,RBPJ,STMN1,RALGAPA2,KLB,GBP1,DUSP16,EIF4E,CRADD,BCL2,MAPT,PDE3B,OVOL2,ISG15,DEPDC1B,NDC80,PRDM16,CACNG7,TMEM131L,ARHGAP11B,GRK7,BIRC3,KIF14
GO:BP	regulation of signal transduction	GO:0009966	FALSE	0.0415364	1.38157	3010	101	31	21031	TANK,PELI1,MLLT3,HOMER1,TFRC,ASPM,SESN3,VAV3,PDE4D,KNL1,RBPJ,STMN1,RALGAPA2,KLB,GBP1,DUSP16,CRADD,BCL2,MAPT,PDE3B,OVOL2,ISG15,DEPDC1B,NDC80,PRDM16,CACNG7,TMEM131L,ARHGAP11B,GRK7,BIRC3,KIF14

## Sheet: SD4
Supplementary Data 4. endothelial shared gene enrichment
source	term_name	term_id	highlighted	adjusted_p_value	negative_log10_of_adjusted_p_value	term_size	query_size	intersection_size	effective_domain_size	intersections
GO:BP	multicellular organismal process	GO:0032501	TRUE	1.65993e-12	11.7799	7669	133	94	21031	SEMA3A,PREX2,FCER1A,MS4A1,ITGB8,CD79A,VWF,FGF10,PTPRB,CLIC5,CCL5,BANK1,BCL11B,EMCN,F13A1,RBM47,MFAP5,CALCRL,CD1C,SLC8A1,TNXB,SEMA5A,RTN1,FLT3,ABI3BP,PCSK6,COL5A2,LMCD1,MARCO,SLC11A1,THBS2,NEGR1,CRTAC1,GJB2,WDFY4,ADGRB3,FCRL1,SNTG2,AQP9,ADAMTSL1,PTGIS,ADAMTS9,RHOJ,MSR1,SMOC1,VEGFC,COL6A1,ASPN,CTLA4,SFRP4,SEMA3C,ADAMTS5,THEMIS,AFF3,OLR1,ITGAX,CD86,MZB1,EDNRA,PCDH17,PADI2,LYN,TANC1,NKG7,POSTN,SLCO2B…
GO:BP	response to stimulus	GO:0050896	FALSE	9.20795e-12	11.0358	8976	133	101	21031	SEMA3A,PREX2,FCER1A,MS4A1,ITGB8,CD79A,VWF,FGF10,ADGRL4,CLIC5,CCL5,BANK1,CD163,F13A1,RBM47,CALCRL,CD1C,SLC8A1,TNXB,SEMA5A,RAPGEF4,FLT3,MCTP1,BLK,ADGRL2,ABI3BP,PCSK6,SKAP1,COL5A2,LMCD1,MARCO,ME1,ITGBL1,SLC11A1,GJB2,WDFY4,ADGRB3,ZNF385B,AQP9,PTGIS,ADAMTS9,RHOJ,MSR1,RALGPS2,VEGFC,COL6A1,ASPN,CTLA4,SFRP4,SEMA3C,MAGI1,ADAMTS5,THEMIS,AFF3,OLR1,ITGAX,GPC6,CD86,ADCY4,MZB1,GPAT3,EDNRA,PADI2,LYN,TANC1,NKG7,…
GO:BP	cell surface receptor signaling pathway	GO:0007166	FALSE	3.47584e-11	10.4589	2799	133	53	21031	SEMA3A,FCER1A,MS4A1,ITGB8,CD79A,FGF10,ADGRL4,CCL5,BANK1,RBM47,CALCRL,TNXB,SEMA5A,FLT3,BLK,ADGRL2,PCSK6,SKAP1,MARCO,ITGBL1,ADGRB3,VEGFC,ASPN,CTLA4,SFRP4,SEMA3C,MAGI1,THEMIS,ITGAX,CD86,MZB1,EDNRA,PADI2,LYN,POSTN,SFRP1,IGF1,ENPP1,MERTK,BMP6,ST18,PRKCQ,EYA2,FCRL5,PLVAP,EFNA5,NOTCH3,IL7R,TLR2,IL1R2,FCRL2,ITGA9,ACKR1
GO:BP	cell adhesion	GO:0007155	FALSE	6.91251e-10	9.16036	1512	133	37	21031	ITGB8,VWF,CCL5,EMCN,TNXB,SEMA5A,ABI3BP,SKAP1,ITGBL1,THBS2,NEGR1,ADAMTSL1,ADAMTS9,FBLN2,COL6A1,CTLA4,MAGI1,OLR1,ITGAX,CD86,PCDH17,LYN,POSTN,PGM5,SFRP1,IGF1,MERTK,BMP6,PRKCQ,NTN4,COL14A1,CNTNAP3B,NUAK1,SLAMF7,EFNA5,IL7R,ITGA9
GO:BP	leukocyte activation	GO:0045321	FALSE	1.82275e-09	8.73927	946	133	29	21031	FCER1A,MS4A1,ITGB8,CD79A,FGF10,CCL5,BANK1,BCL11B,CD1C,FLT3,SLC11A1,WDFY4,FCRL1,CTLA4,THEMIS,CD86,MZB1,LYN,NKG7,SFRP1,IGF1,POU2AF1,MERTK,PRKCQ,SLAMF7,IL7R,TLR2,DNASE1L3,C1QA
GO:BP	cell activation	GO:0001775	FALSE	1.10153e-08	7.958	1092	133	30	21031	FCER1A,MS4A1,ITGB8,CD79A,VWF,FGF10,CCL5,BANK1,BCL11B,CD1C,FLT3,SLC11A1,WDFY4,FCRL1,CTLA4,THEMIS,CD86,MZB1,LYN,NKG7,SFRP1,IGF1,POU2AF1,MERTK,PRKCQ,SLAMF7,IL7R,TLR2,DNASE1L3,C1QA
GO:BP	signaling	GO:0023052	FALSE	3.49908e-08	7.45605	6447	133	78	21031	SEMA3A,PREX2,FCER1A,MS4A1,ITGB8,CD79A,VWF,FGF10,ADGRL4,CCL5,BANK1,RBM47,CALCRL,SLC8A1,TNXB,SEMA5A,RAPGEF4,FLT3,MCTP1,BLK,ADGRL2,PCSK6,SKAP1,LMCD1,MARCO,ITGBL1,GJB2,ADGRB3,ZNF385B,PTGIS,RHOJ,RALGPS2,VEGFC,ASPN,CTLA4,SFRP4,SEMA3C,MYRIP,MAGI1,THEMIS,ITGAX,GPC6,CD86,ADCY4,MZB1,GPAT3,EDNRA,PCDH17,PADI2,LYN,NKG7,POSTN,SFRP1,CNKSR3,IGF1,ENPP1,MERTK,BMP6,ST18,PRKCQ,PDE1A,NTN4,RGS5,EYA2,FCRL5,PDE3A,PLVAP,…
GO:BP	cell communication	GO:0007154	FALSE	7.44772e-08	7.12798	6537	133	78	21031	SEMA3A,PREX2,FCER1A,MS4A1,ITGB8,CD79A,VWF,FGF10,ADGRL4,CCL5,BANK1,RBM47,CALCRL,SLC8A1,TNXB,SEMA5A,RAPGEF4,FLT3,MCTP1,BLK,ADGRL2,PCSK6,SKAP1,LMCD1,MARCO,ITGBL1,GJB2,ADGRB3,ZNF385B,PTGIS,RHOJ,RALGPS2,VEGFC,ASPN,CTLA4,SFRP4,SEMA3C,MYRIP,MAGI1,THEMIS,ITGAX,GPC6,CD86,ADCY4,MZB1,GPAT3,EDNRA,PCDH17,PADI2,LYN,NKG7,POSTN,SFRP1,CNKSR3,IGF1,ENPP1,MERTK,BMP6,ST18,PRKCQ,PDE1A,NTN4,RGS5,EYA2,FCRL5,PDE3A,PLVAP,…
GO:BP	signal transduction	GO:0007165	FALSE	1.89555e-07	6.72226	5959	133	73	21031	SEMA3A,PREX2,FCER1A,MS4A1,ITGB8,CD79A,VWF,FGF10,ADGRL4,CCL5,BANK1,RBM47,CALCRL,SLC8A1,TNXB,SEMA5A,RAPGEF4,FLT3,MCTP1,BLK,ADGRL2,PCSK6,SKAP1,LMCD1,MARCO,ITGBL1,ADGRB3,ZNF385B,PTGIS,RHOJ,RALGPS2,VEGFC,ASPN,CTLA4,SFRP4,SEMA3C,MAGI1,THEMIS,ITGAX,GPC6,CD86,ADCY4,MZB1,GPAT3,EDNRA,PADI2,LYN,NKG7,POSTN,SFRP1,CNKSR3,IGF1,ENPP1,MERTK,BMP6,ST18,PRKCQ,PDE1A,RGS5,EYA2,FCRL5,PDE3A,PLVAP,NUAK1,EFNA5,NOTCH3,IL7R…
GO:BP	lymphocyte activation	GO:0046649	FALSE	2.18777e-07	6.66	783	133	24	21031	MS4A1,CD79A,FGF10,CCL5,BANK1,BCL11B,CD1C,FLT3,SLC11A1,WDFY4,FCRL1,CTLA4,THEMIS,CD86,MZB1,LYN,NKG7,SFRP1,IGF1,POU2AF1,MERTK,PRKCQ,SLAMF7,IL7R
GO:BP	cellular response to stimulus	GO:0051716	FALSE	2.23396e-07	6.65092	7394	133	83	21031	SEMA3A,PREX2,FCER1A,MS4A1,ITGB8,CD79A,VWF,FGF10,ADGRL4,CCL5,BANK1,RBM47,CALCRL,SLC8A1,TNXB,SEMA5A,RAPGEF4,FLT3,MCTP1,BLK,ADGRL2,PCSK6,SKAP1,COL5A2,LMCD1,MARCO,ITGBL1,SLC11A1,GJB2,ADGRB3,ZNF385B,AQP9,PTGIS,RHOJ,MSR1,RALGPS2,VEGFC,COL6A1,ASPN,CTLA4,SFRP4,SEMA3C,MAGI1,THEMIS,ITGAX,GPC6,CD86,ADCY4,MZB1,GPAT3,EDNRA,PADI2,LYN,NKG7,POSTN,SLCO2B1,RAB31,SFRP1,CNKSR3,IGF1,ENPP1,MRC1,MERTK,BMP6,ST18,PRKCQ,P…
GO:BP	regulation of multicellular organismal process	GO:0051239	FALSE	9.52573e-07	6.0211	2955	133	47	21031	SEMA3A,ITGB8,FGF10,CCL5,BANK1,RBM47,SLC8A1,TNXB,SEMA5A,ABI3BP,LMCD1,SLC11A1,THBS2,ADGRB3,PTGIS,ADAMTS9,RHOJ,VEGFC,ASPN,CTLA4,SFRP4,SEMA3C,ADAMTS5,ITGAX,CD86,MZB1,EDNRA,LYN,POSTN,SFRP1,IGF1,PI16,POU2AF1,ENPP1,ABCC9,MERTK,BMP6,PRKCQ,NTN4,COL14A1,PDE3A,EFNA5,IL7R,TLR2,IL1R2,ITGA9,ACKR1
GO:BP	anatomical structure development	GO:0048856	FALSE	1.08721e-06	5.96369	5899	133	71	21031	SEMA3A,PREX2,MS4A1,ITGB8,CD79A,FGF10,PTPRB,BCL11B,EMCN,RBM47,MFAP5,CALCRL,SLC8A1,TNXB,SEMA5A,RTN1,FLT3,ABI3BP,PCSK6,COL5A2,THBS2,NEGR1,CRTAC1,GJB2,ADGRB3,SNTG2,ADAMTSL1,PTGIS,ADAMTS9,RHOJ,SMOC1,VEGFC,COL6A1,ASPN,CTLA4,SFRP4,SEMA3C,ADAMTS5,THEMIS,AFF3,ITGAX,CD86,EDNRA,PCDH17,PADI2,LYN,TANC1,POSTN,PGM5,SFRP1,IGF1,PI16,POU2AF1,ENPP1,ABCC9,MERTK,BMP6,PRKCQ,NTN4,COL14A1,EYA2,KAZN,STOX2,PDE3A,EFNA5,NOT…
GO:BP	developmental process	GO:0032502	FALSE	3.28415e-06	5.48358	6453	133	74	21031	SEMA3A,PREX2,MS4A1,ITGB8,CD79A,FGF10,PTPRB,BCL11B,EMCN,RBM47,MFAP5,CALCRL,SLC8A1,TNXB,SEMA5A,RTN1,FLT3,BLK,ABI3BP,PCSK6,COL5A2,THBS2,NEGR1,CRTAC1,GJB2,ADGRB3,SNTG2,ADAMTSL1,PTGIS,ADAMTS9,RHOJ,MSR1,SMOC1,VEGFC,COL6A1,ASPN,CTLA4,SFRP4,SEMA3C,ADAMTS5,THEMIS,AFF3,ITGAX,CD86,EDNRA,PCDH17,PADI2,LYN,TANC1,POSTN,PGM5,SFRP1,IGF1,PI16,POU2AF1,ENPP1,ABCC9,MERTK,BMP6,PRKCQ,NTN4,COL14A1,EYA2,KAZN,STOX2,PDE3A,…
GO:BP	cell differentiation	GO:0030154	FALSE	3.78548e-06	5.42188	4366	133	58	21031	SEMA3A,PREX2,MS4A1,ITGB8,CD79A,FGF10,PTPRB,BCL11B,RBM47,MFAP5,SLC8A1,TNXB,SEMA5A,RTN1,FLT3,BLK,ABI3BP,COL5A2,NEGR1,CRTAC1,ADGRB3,ADAMTSL1,ADAMTS9,MSR1,SMOC1,VEGFC,COL6A1,CTLA4,SFRP4,SEMA3C,ADAMTS5,THEMIS,CD86,EDNRA,LYN,TANC1,POSTN,PGM5,SFRP1,IGF1,PI16,POU2AF1,ENPP1,MERTK,BMP6,PRKCQ,NTN4,COL14A1,EYA2,KAZN,PDE3A,EFNA5,NOTCH3,IL7R,TLR2,OLFM3,DNASE1L3,C1QA
GO:BP	cellular developmental process	GO:0048869	FALSE	3.81969e-06	5.41797	4367	133	58	21031	SEMA3A,PREX2,MS4A1,ITGB8,CD79A,FGF10,PTPRB,BCL11B,RBM47,MFAP5,SLC8A1,TNXB,SEMA5A,RTN1,FLT3,BLK,ABI3BP,COL5A2,NEGR1,CRTAC1,ADGRB3,ADAMTSL1,ADAMTS9,MSR1,SMOC1,VEGFC,COL6A1,CTLA4,SFRP4,SEMA3C,ADAMTS5,THEMIS,CD86,EDNRA,LYN,TANC1,POSTN,PGM5,SFRP1,IGF1,PI16,POU2AF1,ENPP1,MERTK,BMP6,PRKCQ,NTN4,COL14A1,EYA2,KAZN,PDE3A,EFNA5,NOTCH3,IL7R,TLR2,OLFM3,DNASE1L3,C1QA
GO:BP	multicellular organism development	GO:0007275	FALSE	4.86227e-06	5.31316	4643	133	60	21031	SEMA3A,PREX2,ITGB8,FGF10,PTPRB,BCL11B,EMCN,MFAP5,CALCRL,SLC8A1,TNXB,SEMA5A,RTN1,ABI3BP,PCSK6,COL5A2,THBS2,NEGR1,CRTAC1,GJB2,ADGRB3,SNTG2,ADAMTSL1,PTGIS,ADAMTS9,RHOJ,SMOC1,VEGFC,COL6A1,ASPN,CTLA4,SFRP4,SEMA3C,ADAMTS5,AFF3,ITGAX,CD86,EDNRA,PCDH17,PADI2,LYN,POSTN,SFRP1,IGF1,PI16,ENPP1,ABCC9,MERTK,BMP6,PRKCQ,NTN4,COL14A1,EYA2,STOX2,EFNA5,NOTCH3,IL7R,TLR2,OLFM3,C1QA
GO:BP	immune system process	GO:0002376	FALSE	4.89965e-06	5.30983	2776	133	44	21031	FCER1A,MS4A1,ITGB8,CD79A,FGF10,CCL5,BANK1,BCL11B,RBM47,CD1C,RAPGEF4,FLT3,BLK,SKAP1,MARCO,SLC11A1,WDFY4,FCRL1,VEGFC,CTLA4,SEMA3C,THEMIS,OLR1,CD86,MZB1,PADI2,LYN,NKG7,SFRP1,IGF1,POU2AF1,ENPP1,MRC1,MERTK,BMP6,PRKCQ,PLVAP,SLAMF7,IL7R,TLR2,DNASE1L3,IL1R2,ITGA9,C1QA
GO:BP	regulation of response to stimulus	GO:0048583	FALSE	5.62751e-05	4.24968	3939	133	52	21031	SEMA3A,PREX2,FCER1A,MS4A1,CD79A,VWF,FGF10,CCL5,BANK1,RBM47,CD1C,TNXB,SEMA5A,FLT3,MCTP1,BLK,PCSK6,SKAP1,LMCD1,MARCO,SLC11A1,PTGIS,VEGFC,ASPN,CTLA4,SFRP4,SEMA3C,THEMIS,GPC6,CD86,MZB1,GPAT3,PADI2,LYN,NKG7,POSTN,SFRP1,CNKSR3,IGF1,PI16,ENPP1,BMP6,PRKCQ,RGS5,EYA2,PDE3A,NUAK1,IL7R,TLR2,DNASE1L3,IL1R2,C1QA
GO:BP	cellular response to organic substance	GO:0071310	FALSE	7.44851e-05	4.12793	1971	133	34	21031	CCL5,RBM47,CALCRL,SLC8A1,FLT3,COL5A2,GJB2,AQP9,PTGIS,MSR1,VEGFC,COL6A1,CD86,MZB1,EDNRA,PADI2,LYN,POSTN,RAB31,SFRP1,IGF1,ENPP1,MRC1,BMP6,ST18,PRKCQ,PCOLCE2,PDE3A,PLVAP,EFNA5,IL7R,TLR2,IL1R2,ACKR1
GO:BP	cell development	GO:0048468	FALSE	8.01834e-05	4.09592	2819	133	42	21031	SEMA3A,PREX2,MS4A1,ITGB8,CD79A,BCL11B,RBM47,MFAP5,SLC8A1,TNXB,SEMA5A,FLT3,NEGR1,CRTAC1,ADGRB3,ADAMTSL1,VEGFC,CTLA4,SEMA3C,THEMIS,CD86,EDNRA,LYN,POSTN,PGM5,SFRP1,IGF1,PI16,POU2AF1,MERTK,BMP6,PRKCQ,NTN4,COL14A1,PDE3A,EFNA5,NOTCH3,IL7R,TLR2,OLFM3,DNASE1L3,C1QA
GO:BP	cell-substrate adhesion	GO:0031589	FALSE	8.83993e-05	4.05355	351	133	14	21031	ITGB8,VWF,TNXB,ABI3BP,SKAP1,ADAMTS9,FBLN2,ITGAX,POSTN,SFRP1,MERTK,NTN4,EFNA5,ITGA9
GO:BP	response to organic substance	GO:0010033	FALSE	0.000117453	3.93014	2637	133	40	21031	FGF10,CCL5,RBM47,CALCRL,SLC8A1,FLT3,COL5A2,ME1,SLC11A1,GJB2,AQP9,PTGIS,MSR1,VEGFC,COL6A1,SFRP4,AFF3,CD86,MZB1,EDNRA,PADI2,LYN,POSTN,RAB31,SFRP1,IGF1,ENPP1,MRC1,ABCC9,BMP6,ST18,PRKCQ,PCOLCE2,PDE3A,PLVAP,EFNA5,IL7R,TLR2,IL1R2,ACKR1
GO:BP	lymphocyte proliferation	GO:0046651	FALSE	0.000141529	3.84915	308	133	13	21031	MS4A1,CD79A,FGF10,CCL5,FLT3,SLC11A1,CTLA4,CD86,MZB1,LYN,IGF1,PRKCQ,IL7R
GO:BP	mononuclear cell proliferation	GO:0032943	FALSE	0.000183658	3.73599	315	133	13	21031	MS4A1,CD79A,FGF10,CCL5,FLT3,SLC11A1,CTLA4,CD86,MZB1,LYN,IGF1,PRKCQ,IL7R
GO:BP	anatomical structure morphogenesis	GO:0009653	FALSE	0.000190344	3.72046	2684	133	40	21031	SEMA3A,PREX2,ITGB8,FGF10,PTPRB,BCL11B,EMCN,MFAP5,CALCRL,SEMA5A,COL5A2,THBS2,ADGRB3,ADAMTSL1,PTGIS,ADAMTS9,RHOJ,VEGFC,COL6A1,ASPN,SFRP4,SEMA3C,ADAMTS5,AFF3,ITGAX,EDNRA,TANC1,POSTN,PGM5,SFRP1,ABCC9,BMP6,PRKCQ,NTN4,EYA2,EFNA5,NOTCH3,IL7R,TLR2,OLFM3
GO:BP	circulatory system development	GO:0072359	FALSE	0.000271006	3.56702	1130	133	24	21031	ITGB8,FGF10,PTPRB,EMCN,CALCRL,SLC8A1,SEMA5A,ABI3BP,THBS2,ADGRB3,PTGIS,ADAMTS9,RHOJ,VEGFC,SEMA3C,ADAMTS5,ITGAX,EDNRA,SFRP1,IGF1,PI16,ABCC9,COL14A1,NOTCH3
GO:BP	response to external stimulus	GO:0009605	FALSE	0.000281354	3.55075	2723	133	40	21031	SEMA3A,MS4A1,ITGB8,FGF10,CCL5,BANK1,RBM47,SLC8A1,SEMA5A,BLK,MARCO,SLC11A1,GJB2,WDFY4,PTGIS,ADAMTS9,VEGFC,SEMA3C,ADAMTS5,ITGAX,CD86,PADI2,LYN,NKG7,POSTN,SFRP1,IGF1,POU2AF1,MRC1,ABCC9,BMP6,PRKCQ,NUAK1,SLAMF7,EFNA5,IL7R,TLR2,DNASE1L3,ITGA9,C1QA
GO:BP	regulation of multicellular organismal development	GO:2000026	FALSE	0.000330001	3.48148	1411	133	27	21031	SEMA3A,ITGB8,FGF10,SLC8A1,SEMA5A,THBS2,ADGRB3,PTGIS,ADAMTS9,RHOJ,VEGFC,ASPN,CTLA4,SFRP4,SEMA3C,ITGAX,CD86,LYN,SFRP1,IGF1,PI16,ENPP1,BMP6,COL14A1,EFNA5,IL7R,TLR2
GO:BP	B cell activation	GO:0042113	FALSE	0.000402954	3.39474	281	133	12	21031	MS4A1,CD79A,BANK1,FLT3,FCRL1,CTLA4,CD86,MZB1,LYN,SFRP1,POU2AF1,IL7R
GO:BP	cellular response to endogenous stimulus	GO:0071495	FALSE	0.000443011	3.35359	1432	133	27	21031	ITGB8,FGF10,CCL5,SLC8A1,TNXB,FLT3,PCSK6,COL5A2,GJB2,AQP9,VEGFC,COL6A1,ASPN,SFRP4,MZB1,EDNRA,PADI2,LYN,POSTN,RAB31,SFRP1,IGF1,ENPP1,BMP6,PRKCQ,PDE3A,EFNA5
GO:BP	angiogenesis	GO:0001525	FALSE	0.0005276	3.2777	538	133	16	21031	ITGB8,FGF10,PTPRB,EMCN,CALCRL,SEMA5A,THBS2,ADGRB3,PTGIS,ADAMTS9,RHOJ,VEGFC,ITGAX,EDNRA,SFRP1,NOTCH3
GO:BP	system development	GO:0048731	FALSE	0.000570279	3.24391	3973	133	50	21031	SEMA3A,PREX2,ITGB8,FGF10,PTPRB,BCL11B,EMCN,MFAP5,CALCRL,SLC8A1,TNXB,SEMA5A,RTN1,ABI3BP,COL5A2,THBS2,NEGR1,CRTAC1,ADGRB3,SNTG2,ADAMTSL1,PTGIS,ADAMTS9,RHOJ,SMOC1,VEGFC,SFRP4,SEMA3C,ADAMTS5,ITGAX,EDNRA,PCDH17,PADI2,LYN,POSTN,SFRP1,IGF1,PI16,ABCC9,MERTK,BMP6,PRKCQ,NTN4,COL14A1,EFNA5,NOTCH3,IL7R,TLR2,OLFM3,C1QA
GO:BP	anatomical structure formation involved in morphogenesis	GO:0048646	FALSE	0.000624952	3.20415	1183	133	24	21031	ITGB8,FGF10,PTPRB,EMCN,CALCRL,SEMA5A,COL5A2,THBS2,ADGRB3,PTGIS,ADAMTS9,RHOJ,VEGFC,COL6A1,SEMA3C,ADAMTS5,ITGAX,EDNRA,TANC1,PGM5,SFRP1,EYA2,NOTCH3,TLR2
GO:BP	leukocyte proliferation	GO:0070661	FALSE	0.000635054	3.19719	351	133	13	21031	MS4A1,CD79A,FGF10,CCL5,FLT3,SLC11A1,CTLA4,CD86,MZB1,LYN,IGF1,PRKCQ,IL7R
GO:BP	regulation of biological process	GO:0050789	FALSE	0.000747236	3.12654	12287	133	105	21031	SEMA3A,PREX2,FCER1A,MS4A1,ITGB8,CD79A,VWF,FGF10,ADGRL4,CCL5,BANK1,BCL11B,EMCN,RBM47,CALCRL,CD1C,SLC8A1,TNXB,SEMA5A,PKIB,RAPGEF4,RTN1,FLT3,MCTP1,BLK,ADGRL2,ABI3BP,PCSK6,SKAP1,COL5A2,LMCD1,MARCO,ME1,ITGBL1,SLC11A1,THBS2,NEGR1,GJB2,ADGRB3,ZNF385B,PTGIS,ADAMTS9,RHOJ,MSR1,PARM1,SMOC1,FBLN2,RALGPS2,VEGFC,ASPN,CTLA4,SFRP4,SEMA3C,MYRIP,MAGI1,ADAMTS5,THEMIS,AFF3,ITGAX,GPC6,CD86,ADCY4,MZB1,GPAT3,EDNRA,PCDH…
GO:BP	regulation of cell adhesion	GO:0030155	FALSE	0.000788464	3.10322	778	133	19	21031	CCL5,EMCN,TNXB,SEMA5A,ABI3BP,SKAP1,FBLN2,CTLA4,MAGI1,CD86,LYN,POSTN,SFRP1,IGF1,BMP6,PRKCQ,NUAK1,EFNA5,IL7R
GO:BP	biological regulation	GO:0065007	FALSE	0.000857636	3.0667	12680	133	107	21031	SEMA3A,PREX2,FCER1A,MS4A1,ITGB8,CD79A,VWF,FGF10,ADGRL4,CCL5,BANK1,BCL11B,EMCN,F13A1,RBM47,CALCRL,CD1C,SLC8A1,TNXB,SEMA5A,PKIB,RAPGEF4,RTN1,FLT3,MCTP1,BLK,ADGRL2,ABI3BP,PCSK6,SKAP1,COL5A2,LMCD1,MARCO,ME1,ITGBL1,SLC11A1,THBS2,NEGR1,GJB2,ADGRB3,ZNF385B,PTGIS,ADAMTS9,RHOJ,MSR1,PARM1,SMOC1,FBLN2,RALGPS2,VEGFC,ASPN,CTLA4,SFRP4,SEMA3C,MYRIP,MAGI1,ADAMTS5,THEMIS,AFF3,ITGAX,GPC6,CD86,ADCY4,MZB1,GPAT3,EDNR…
GO:BP	response to endogenous stimulus	GO:0009719	FALSE	0.0009028	3.04441	1678	133	29	21031	ITGB8,FGF10,CCL5,SLC8A1,TNXB,FLT3,PCSK6,COL5A2,ME1,GJB2,AQP9,VEGFC,COL6A1,ASPN,SFRP4,MZB1,EDNRA,PADI2,LYN,POSTN,RAB31,SFRP1,IGF1,ENPP1,BMP6,PRKCQ,PDE3A,EFNA5,TLR2
GO:BP	regulation of biological quality	GO:0065008	FALSE	0.000912724	3.03966	2846	133	40	21031	SEMA3A,VWF,FGF10,CCL5,F13A1,RBM47,SLC8A1,SEMA5A,RAPGEF4,MCTP1,BLK,PCSK6,SLC11A1,THBS2,NEGR1,ADGRB3,RHOJ,VEGFC,SEMA3C,MYRIP,GPC6,EDNRA,LYN,TANC1,POSTN,SFRP1,IGF1,DMXL2,ABCC9,MERTK,BMP6,PRKCQ,EYA2,PDE3A,PLVAP,EFNA5,BACE2,IL7R,TLR2,ITGA9
GO:BP	regulation of cell communication	GO:0010646	FALSE	0.00105274	2.97768	3443	133	45	21031	SEMA3A,PREX2,ITGB8,VWF,FGF10,CCL5,BANK1,RBM47,SLC8A1,TNXB,SEMA5A,RAPGEF4,FLT3,MCTP1,BLK,PCSK6,LMCD1,MARCO,PTGIS,VEGFC,ASPN,SFRP4,MYRIP,GPC6,CD86,MZB1,GPAT3,PCDH17,PADI2,LYN,POSTN,SFRP1,CNKSR3,IGF1,ENPP1,BMP6,PRKCQ,RGS5,EYA2,PDE3A,NUAK1,EFNA5,IL7R,TLR2,IL1R2
GO:BP	blood vessel development	GO:0001568	FALSE	0.00118824	2.92509	721	133	18	21031	ITGB8,FGF10,PTPRB,EMCN,CALCRL,SEMA5A,THBS2,ADGRB3,PTGIS,ADAMTS9,RHOJ,VEGFC,SEMA3C,ITGAX,EDNRA,SFRP1,ABCC9,NOTCH3
GO:BP	positive regulation of immune system process	GO:0002684	FALSE	0.00128469	2.8912	1054	133	22	21031	MS4A1,CD79A,FGF10,CCL5,BANK1,RBM47,CD1C,BLK,SKAP1,SLC11A1,VEGFC,CTLA4,THEMIS,CD86,MZB1,LYN,IGF1,PRKCQ,PLVAP,IL7R,TLR2,C1QA
GO:BP	regulation of immune system process	GO:0002682	FALSE	0.00128951	2.88958	1512	133	27	21031	FCER1A,MS4A1,CD79A,FGF10,CCL5,BANK1,RBM47,CD1C,BLK,SKAP1,SLC11A1,VEGFC,CTLA4,THEMIS,CD86,MZB1,PADI2,LYN,SFRP1,IGF1,MERTK,PRKCQ,PLVAP,IL7R,TLR2,DNASE1L3,C1QA
GO:BP	regulation of developmental process	GO:0050793	FALSE	0.00152851	2.81573	2455	133	36	21031	SEMA3A,ITGB8,FGF10,BCL11B,SLC8A1,TNXB,SEMA5A,ABI3BP,COL5A2,THBS2,ADGRB3,PTGIS,ADAMTS9,RHOJ,MSR1,SMOC1,VEGFC,ASPN,CTLA4,SFRP4,SEMA3C,ITGAX,CD86,LYN,SFRP1,IGF1,PI16,ENPP1,BMP6,NTN4,COL14A1,PDE3A,EFNA5,NOTCH3,IL7R,TLR2
GO:BP	cellular response to chemical stimulus	GO:0070887	FALSE	0.00162466	2.78924	2683	133	38	21031	CCL5,RBM47,CALCRL,SLC8A1,SEMA5A,FLT3,COL5A2,SLC11A1,GJB2,AQP9,PTGIS,MSR1,VEGFC,COL6A1,CD86,MZB1,EDNRA,PADI2,LYN,POSTN,SLCO2B1,RAB31,SFRP1,IGF1,ENPP1,MRC1,BMP6,ST18,PRKCQ,PCOLCE2,PDE3A,PLVAP,EFNA5,IL7R,TLR2,IL1R2,ITGA9,ACKR1
GO:BP	vasculature development	GO:0001944	FALSE	0.00217009	2.66352	752	133	18	21031	ITGB8,FGF10,PTPRB,EMCN,CALCRL,SEMA5A,THBS2,ADGRB3,PTGIS,ADAMTS9,RHOJ,VEGFC,SEMA3C,ITGAX,EDNRA,SFRP1,ABCC9,NOTCH3
GO:BP	regulation of signaling	GO:0023051	FALSE	0.00266253	2.5747	3437	133	44	21031	SEMA3A,PREX2,ITGB8,VWF,FGF10,CCL5,BANK1,RBM47,TNXB,SEMA5A,RAPGEF4,FLT3,MCTP1,BLK,PCSK6,LMCD1,MARCO,PTGIS,VEGFC,ASPN,SFRP4,MYRIP,GPC6,CD86,MZB1,GPAT3,PCDH17,PADI2,LYN,POSTN,SFRP1,CNKSR3,IGF1,ENPP1,BMP6,PRKCQ,RGS5,EYA2,PDE3A,NUAK1,EFNA5,IL7R,TLR2,IL1R2
GO:BP	neuron remodeling	GO:0016322	TRUE	0.00340835	2.46746	15	133	4	21031	ADGRB3,EDNRA,NTN4,C1QA
GO:BP	blood vessel morphogenesis	GO:0048514	FALSE	0.0037714	2.4235	625	133	16	21031	ITGB8,FGF10,PTPRB,EMCN,CALCRL,SEMA5A,THBS2,ADGRB3,PTGIS,ADAMTS9,RHOJ,VEGFC,ITGAX,EDNRA,SFRP1,NOTCH3
GO:BP	positive regulation of biological process	GO:0048518	FALSE	0.00435629	2.36088	6250	133	65	21031	SEMA3A,MS4A1,ITGB8,CD79A,VWF,FGF10,CCL5,BANK1,BCL11B,RBM47,CALCRL,CD1C,SLC8A1,TNXB,SEMA5A,PKIB,RAPGEF4,FLT3,BLK,ABI3BP,SKAP1,LMCD1,MARCO,SLC11A1,THBS2,NEGR1,ADGRB3,PTGIS,ADAMTS9,RHOJ,MSR1,PARM1,FBLN2,VEGFC,CTLA4,SFRP4,SEMA3C,MYRIP,MAGI1,THEMIS,ITGAX,CD86,MZB1,EDNRA,PADI2,LYN,NKG7,POSTN,RAB31,SFRP1,CNKSR3,IGF1,POU2AF1,MERTK,BMP6,ST18,PRKCQ,EYA2,PDE3A,PLVAP,EFNA5,NOTCH3,IL7R,TLR2,C1QA
GO:BP	export from cell	GO:0140352	TRUE	0.00615985	2.21043	894	133	19	21031	FCER1A,FGF10,CCL5,SLC8A1,RAPGEF4,MCTP1,BLK,PCSK6,VEGFC,MYRIP,LYN,NKG7,RAB31,SFRP1,IGF1,MERTK,BMP6,EFNA5,TLR2
GO:BP	positive regulation of response to stimulus	GO:0048584	FALSE	0.00631711	2.19948	2274	133	33	21031	SEMA3A,MS4A1,CD79A,VWF,FGF10,CCL5,BANK1,RBM47,CD1C,TNXB,SEMA5A,FLT3,BLK,SKAP1,LMCD1,MARCO,SLC11A1,PTGIS,VEGFC,CTLA4,SFRP4,THEMIS,CD86,LYN,NKG7,SFRP1,IGF1,BMP6,PRKCQ,EYA2,IL7R,TLR2,C1QA
GO:BP	secretion by cell	GO:0032940	FALSE	0.00822059	2.0851	827	133	18	21031	FCER1A,FGF10,CCL5,RAPGEF4,MCTP1,BLK,PCSK6,VEGFC,MYRIP,LYN,NKG7,RAB31,SFRP1,IGF1,MERTK,BMP6,EFNA5,TLR2
GO:BP	immune response	GO:0006955	FALSE	0.00909508	2.04119	1988	133	30	21031	FCER1A,MS4A1,ITGB8,CD79A,CCL5,BANK1,RBM47,CD1C,RAPGEF4,BLK,SKAP1,MARCO,SLC11A1,CTLA4,SEMA3C,THEMIS,CD86,LYN,NKG7,POU2AF1,ENPP1,MRC1,BMP6,PRKCQ,SLAMF7,IL7R,TLR2,DNASE1L3,IL1R2,C1QA
GO:BP	regulation of cell differentiation	GO:0045595	FALSE	0.00920121	2.03615	1576	133	26	21031	SEMA3A,FGF10,BCL11B,TNXB,SEMA5A,ABI3BP,COL5A2,ADAMTS9,MSR1,SMOC1,VEGFC,CTLA4,SFRP4,SEMA3C,CD86,LYN,SFRP1,IGF1,PI16,ENPP1,BMP6,PDE3A,EFNA5,NOTCH3,IL7R,TLR2
GO:BP	import into cell	GO:0098657	TRUE	0.00974703	2.01113	923	133	19	21031	MS4A1,CD163,CALCRL,SLC8A1,MCTP1,MARCO,SLC11A1,RHOJ,MSR1,SFRP4,OLR1,LYN,RAB31,ENPP1,MRC1,ABCC9,MERTK,TLR2,SLC7A2
GO:BP	peptidyl-tyrosine phosphorylation	GO:0018108	TRUE	0.0100567	1.99754	258	133	10	21031	FGF10,CCL5,BANK1,FLT3,BLK,LYN,SFRP1,IGF1,BMP6,EFNA5
GO:BP	B cell receptor signaling pathway	GO:0050853	TRUE	0.0100682	1.99705	71	133	6	21031	MS4A1,CD79A,BANK1,BLK,CTLA4,LYN
GO:BP	peptidyl-tyrosine modification	GO:0018212	FALSE	0.0107638	1.96804	260	133	10	21031	FGF10,CCL5,BANK1,FLT3,BLK,LYN,SFRP1,IGF1,BMP6,EFNA5
GO:BP	cell population proliferation	GO:0008283	FALSE	0.010886	1.96313	2006	133	30	21031	MS4A1,CD79A,FGF10,CCL5,BCL11B,CALCRL,TNXB,SEMA5A,FLT3,ABI3BP,SLC11A1,VEGFC,CTLA4,SFRP4,ITGAX,CD86,MZB1,EDNRA,LYN,SFRP1,IGF1,ABCC9,BMP6,ST18,PRKCQ,PDE1A,NUAK1,NOTCH3,IL7R,TLR2
GO:BP	regulation of cellular process	GO:0050794	FALSE	0.011081	1.95542	11738	133	99	21031	SEMA3A,PREX2,FCER1A,MS4A1,ITGB8,CD79A,VWF,FGF10,ADGRL4,CCL5,BANK1,BCL11B,EMCN,RBM47,CALCRL,CD1C,SLC8A1,TNXB,SEMA5A,PKIB,RAPGEF4,FLT3,MCTP1,BLK,ADGRL2,ABI3BP,PCSK6,SKAP1,COL5A2,LMCD1,MARCO,ME1,ITGBL1,SLC11A1,THBS2,NEGR1,ADGRB3,ZNF385B,PTGIS,ADAMTS9,RHOJ,MSR1,PARM1,SMOC1,FBLN2,RALGPS2,VEGFC,ASPN,CTLA4,SFRP4,SEMA3C,MYRIP,MAGI1,THEMIS,AFF3,ITGAX,GPC6,CD86,ADCY4,MZB1,GPAT3,EDNRA,PCDH17,PADI2,LYN,TANC1…
GO:BP	response to cytokine	GO:0034097	FALSE	0.0111944	1.951	932	133	19	21031	CCL5,RBM47,FLT3,SLC11A1,PTGIS,VEGFC,AFF3,PADI2,LYN,POSTN,SFRP1,MRC1,ST18,PCOLCE2,PLVAP,IL7R,TLR2,IL1R2,ACKR1
GO:BP	cell migration	GO:0016477	TRUE	0.011547	1.93753	1496	133	25	21031	SEMA3A,FGF10,PTPRB,CCL5,BCL11B,TNXB,SEMA5A,MCTP1,ADAMTS9,RHOJ,VEGFC,SEMA3C,ITGAX,GPC6,EDNRA,PADI2,LYN,POSTN,SFRP1,IGF1,MERTK,PRKCQ,NTN4,PLVAP,ITGA9
GO:BP	extracellular matrix organization	GO:0030198	TRUE	0.011993	1.92107	324	133	11	21031	TNXB,COL22A1,ABI3BP,COL5A2,ADAMTSL1,ADAMTS9,SMOC1,ADAMTS5,POSTN,NTN4,COL14A1
GO:BP	extracellular structure organization	GO:0043062	FALSE	0.0123471	1.90844	325	133	11	21031	TNXB,COL22A1,ABI3BP,COL5A2,ADAMTSL1,ADAMTS9,SMOC1,ADAMTS5,POSTN,NTN4,COL14A1
GO:BP	external encapsulating structure organization	GO:0045229	FALSE	0.0127102	1.89585	326	133	11	21031	TNXB,COL22A1,ABI3BP,COL5A2,ADAMTSL1,ADAMTS9,SMOC1,ADAMTS5,POSTN,NTN4,COL14A1
GO:BP	regulation of protein secretion	GO:0050708	TRUE	0.0127227	1.89542	265	133	10	21031	CCL5,RAPGEF4,BLK,VEGFC,MYRIP,SFRP1,IGF1,BMP6,EFNA5,TLR2
GO:BP	animal organ development	GO:0048513	FALSE	0.0128178	1.89219	3039	133	39	21031	SEMA3A,ITGB8,FGF10,BCL11B,MFAP5,CALCRL,SLC8A1,TNXB,SEMA5A,RTN1,FLT3,ABI3BP,COL5A2,GJB2,ADAMTS9,RHOJ,SMOC1,VEGFC,ASPN,SFRP4,SEMA3C,ADAMTS5,ITGAX,EDNRA,PADI2,SFRP1,IGF1,PI16,ENPP1,ABCC9,MERTK,BMP6,NTN4,COL14A1,KAZN,STOX2,NOTCH3,IL7R,OLFM3
GO:BP	immune response-regulating cell surface receptor signaling pathway	GO:0002768	FALSE	0.0130827	1.8833	327	133	11	21031	FCER1A,MS4A1,CD79A,BANK1,BLK,SKAP1,CTLA4,THEMIS,LYN,PRKCQ,TLR2
GO:BP	cell-cell adhesion	GO:0098609	FALSE	0.0138347	1.85903	946	133	19	21031	CCL5,EMCN,TNXB,SKAP1,NEGR1,CTLA4,MAGI1,OLR1,ITGAX,CD86,PCDH17,LYN,IGF1,BMP6,PRKCQ,COL14A1,EFNA5,IL7R,ITGA9
GO:BP	positive regulation of developmental process	GO:0051094	FALSE	0.0161335	1.79227	1328	133	23	21031	ITGB8,FGF10,SLC8A1,TNXB,SEMA5A,ABI3BP,THBS2,ADGRB3,PTGIS,ADAMTS9,MSR1,VEGFC,SFRP4,ITGAX,CD86,LYN,SFRP1,IGF1,BMP6,PDE3A,EFNA5,IL7R,TLR2
GO:BP	positive regulation of peptidyl-tyrosine phosphorylation	GO:0050731	FALSE	0.0162975	1.78788	163	133	8	21031	FGF10,CCL5,BANK1,FLT3,LYN,IGF1,BMP6,EFNA5
GO:BP	secretion	GO:0046903	FALSE	0.0177895	1.74984	963	133	19	21031	FCER1A,FGF10,CCL5,RAPGEF4,MCTP1,BLK,PCSK6,AQP9,VEGFC,MYRIP,LYN,NKG7,RAB31,SFRP1,IGF1,MERTK,BMP6,EFNA5,TLR2
GO:BP	regulation of peptidyl-tyrosine phosphorylation	GO:0050730	FALSE	0.019459	1.71088	220	133	9	21031	FGF10,CCL5,BANK1,FLT3,LYN,SFRP1,IGF1,BMP6,EFNA5
GO:BP	regulation of immune response	GO:0050776	FALSE	0.0194854	1.71029	881	133	18	21031	FCER1A,MS4A1,CD79A,CCL5,BANK1,RBM47,CD1C,BLK,SKAP1,SLC11A1,CTLA4,THEMIS,CD86,LYN,PRKCQ,IL7R,TLR2,C1QA
GO:BP	T cell activation	GO:0042110	FALSE	0.0200283	1.69836	555	133	14	21031	CCL5,BCL11B,CD1C,SLC11A1,WDFY4,CTLA4,THEMIS,CD86,LYN,NKG7,IGF1,PRKCQ,SLAMF7,IL7R
GO:BP	response to chemical	GO:0042221	FALSE	0.0200789	1.69726	3957	133	46	21031	SEMA3A,FGF10,CCL5,RBM47,CALCRL,SLC8A1,SEMA5A,FLT3,COL5A2,ME1,SLC11A1,GJB2,AQP9,PTGIS,MSR1,VEGFC,COL6A1,ASPN,SFRP4,SEMA3C,AFF3,CD86,MZB1,EDNRA,PADI2,LYN,POSTN,SLCO2B1,RAB31,SFRP1,IGF1,ENPP1,MRC1,ABCC9,BMP6,ST18,PRKCQ,PCOLCE2,PDE3A,PLVAP,EFNA5,IL7R,TLR2,IL1R2,ITGA9,ACKR1
GO:BP	response to other organism	GO:0051707	FALSE	0.0208106	1.68172	1548	133	25	21031	MS4A1,ITGB8,FGF10,CCL5,BANK1,RBM47,BLK,MARCO,SLC11A1,GJB2,WDFY4,ADAMTS9,ADAMTS5,ITGAX,CD86,LYN,NKG7,POU2AF1,MRC1,ABCC9,BMP6,SLAMF7,IL7R,TLR2,C1QA
GO:BP	response to external biotic stimulus	GO:0043207	FALSE	0.0215104	1.66735	1551	133	25	21031	MS4A1,ITGB8,FGF10,CCL5,BANK1,RBM47,BLK,MARCO,SLC11A1,GJB2,WDFY4,ADAMTS9,ADAMTS5,ITGAX,CD86,LYN,NKG7,POU2AF1,MRC1,ABCC9,BMP6,SLAMF7,IL7R,TLR2,C1QA
GO:BP	mononuclear cell differentiation	GO:1903131	TRUE	0.0216425	1.66469	484	133	13	21031	MS4A1,ITGB8,CD79A,BCL11B,FLT3,CTLA4,THEMIS,CD86,LYN,SFRP1,POU2AF1,MERTK,IL7R
GO:BP	positive regulation of immune response	GO:0050778	FALSE	0.021681	1.66392	718	133	16	21031	MS4A1,CD79A,CCL5,BANK1,RBM47,CD1C,BLK,SKAP1,SLC11A1,CTLA4,THEMIS,CD86,LYN,PRKCQ,TLR2,C1QA
GO:BP	positive regulation of cellular process	GO:0048522	FALSE	0.0256221	1.59138	5717	133	59	21031	SEMA3A,MS4A1,ITGB8,VWF,FGF10,CCL5,BANK1,BCL11B,RBM47,CALCRL,CD1C,TNXB,SEMA5A,PKIB,RAPGEF4,FLT3,BLK,ABI3BP,SKAP1,LMCD1,MARCO,SLC11A1,THBS2,NEGR1,ADGRB3,PTGIS,ADAMTS9,RHOJ,MSR1,PARM1,FBLN2,VEGFC,CTLA4,SFRP4,SEMA3C,MYRIP,MAGI1,ITGAX,CD86,MZB1,EDNRA,PADI2,LYN,POSTN,RAB31,SFRP1,IGF1,POU2AF1,MERTK,BMP6,ST18,PRKCQ,EYA2,PDE3A,PLVAP,EFNA5,NOTCH3,IL7R,TLR2
GO:BP	regulation of angiogenesis	GO:0045765	FALSE	0.0262359	1.5811	288	133	10	21031	ITGB8,SEMA5A,THBS2,ADGRB3,PTGIS,ADAMTS9,RHOJ,VEGFC,ITGAX,SFRP1
GO:BP	cellular response to oxygen-containing compound	GO:1901701	FALSE	0.0274481	1.56149	1179	133	21	21031	CALCRL,SLC8A1,COL5A2,GJB2,AQP9,COL6A1,CD86,MZB1,EDNRA,LYN,POSTN,RAB31,SFRP1,IGF1,ENPP1,MRC1,BMP6,PRKCQ,PDE3A,EFNA5,TLR2
GO:BP	negative regulation of T cell apoptotic process	GO:0070233	TRUE	0.030074	1.52181	25	133	4	21031	CCL5,BCL11B,PRKCQ,IL7R
GO:BP	regulation of vasculature development	GO:1901342	FALSE	0.030428	1.51673	293	133	10	21031	ITGB8,SEMA5A,THBS2,ADGRB3,PTGIS,ADAMTS9,RHOJ,VEGFC,ITGAX,SFRP1
GO:BP	developmental cell growth	GO:0048588	FALSE	0.0307358	1.51236	233	133	9	21031	SEMA3A,SEMA5A,SEMA3C,EDNRA,POSTN,IGF1,PI16,COL14A1,EFNA5
GO:BP	response to biotic stimulus	GO:0009607	FALSE	0.0314182	1.50282	1586	133	25	21031	MS4A1,ITGB8,FGF10,CCL5,BANK1,RBM47,BLK,MARCO,SLC11A1,GJB2,WDFY4,ADAMTS9,ADAMTS5,ITGAX,CD86,LYN,NKG7,POU2AF1,MRC1,ABCC9,BMP6,SLAMF7,IL7R,TLR2,C1QA
GO:BP	tissue development	GO:0009888	FALSE	0.0318945	1.49628	2010	133	29	21031	SEMA3A,ITGB8,FGF10,BCL11B,SLC8A1,TNXB,SEMA5A,COL5A2,GJB2,ADAMTS9,VEGFC,COL6A1,ASPN,SFRP4,SEMA3C,ADAMTS5,ITGAX,EDNRA,POSTN,PGM5,SFRP1,IGF1,PI16,ENPP1,BMP6,NTN4,COL14A1,EYA2,KAZN
GO:BP	cell-matrix adhesion	GO:0007160	FALSE	0.0328876	1.48297	235	133	9	21031	ITGB8,TNXB,SKAP1,ADAMTS9,ITGAX,POSTN,SFRP1,EFNA5,ITGA9
GO:BP	inflammatory response	GO:0006954	TRUE	0.0332938	1.47764	829	133	17	21031	FCER1A,CCL5,CD163,ABI3BP,SLC11A1,PTGIS,OLR1,LYN,NKG7,IGF1,BMP6,PRKCQ,TLR2,DNASE1L3,IL1R2,C1QA,ACKR1
GO:BP	regulation of leukocyte apoptotic process	GO:2000106	TRUE	0.0372257	1.42916	89	133	6	21031	CCL5,BCL11B,LYN,MERTK,PRKCQ,IL7R
GO:BP	negative regulation of multicellular organismal process	GO:0051241	FALSE	0.0380058	1.42015	1110	133	20	21031	SEMA3A,BANK1,SEMA5A,ABI3BP,SLC11A1,THBS2,ADGRB3,ADAMTS9,CTLA4,SEMA3C,ADAMTS5,LYN,SFRP1,IGF1,PI16,ENPP1,MERTK,TLR2,IL1R2,ITGA9
GO:BP	cellular response to cytokine stimulus	GO:0071345	FALSE	0.0387793	1.4114	839	133	17	21031	CCL5,RBM47,FLT3,PTGIS,VEGFC,PADI2,LYN,POSTN,SFRP1,MRC1,ST18,PCOLCE2,PLVAP,IL7R,TLR2,IL1R2,ACKR1
GO:BP	negative regulation of developmental process	GO:0051093	FALSE	0.0390184	1.40873	928	133	18	21031	SEMA3A,FGF10,SEMA5A,COL5A2,THBS2,ADGRB3,ADAMTS9,VEGFC,ASPN,CTLA4,SEMA3C,LYN,SFRP1,IGF1,PI16,ENPP1,NOTCH3,TLR2
GO:BP	negative regulation of leukocyte apoptotic process	GO:2000107	FALSE	0.0436501	1.36002	55	133	5	21031	CCL5,BCL11B,MERTK,PRKCQ,IL7R
GO:BP	striated muscle tissue development	GO:0014706	TRUE	0.0486827	1.31263	247	133	9	21031	SLC8A1,ADAMTS9,SEMA3C,EDNRA,PGM5,IGF1,PI16,COL14A1,EYA2

## Sheet: SD5
Supplementary Data 5. myeloid private gene enrichment
source	term_name	term_id	highlighted	adjusted_p_value	negative_log10_of_adjusted_p_value	term_size	query_size	intersection_size	effective_domain_size	intersections
GO:BP	chromosome segregation	GO:0007059	TRUE	3.44387e-06	5.46295	425	100	15	21031	DIAPH3,MKI67,ASPM,TOP2A,KNL1,TEX14,CENPF,BRIP1,CENPM,NDC80,KIF14,STIL,NCAPH,NUF2,OIP5
GO:BP	cell cycle process	GO:0022402	FALSE	0.000234017	3.63075	1276	100	22	21031	BIN3,DIAPH3,MKI67,CDC14A,ASPM,TOP2A,KNL1,TEX14,CENPF,STMN1,BRIP1,CLSPN,EIF4E,CENPM,CRADD,BCL2,NDC80,KIF14,STIL,NCAPH,NUF2,OIP5
GO:BP	cell division	GO:0051301	TRUE	0.00103883	2.98346	656	100	15	21031	BIN3,CDC14A,MLLT3,ASPM,TOP2A,KNL1,TEX14,CENPF,STMN1,BRIP1,NDC80,KIF14,NCAPH,NUF2,OIP5
GO:BP	regulation of mitotic cell cycle phase transition	GO:1901990	FALSE	0.00113361	2.94553	332	100	11	21031	CDC14A,KNL1,TEX14,CENPF,CLSPN,CRADD,BCL2,NDC80,KIF14,STIL,NUF2
GO:BP	organelle fission	GO:0048285	FALSE	0.00139268	2.85615	495	100	13	21031	MKI67,CDC14A,ASPM,TOP2A,KNL1,TEX14,CENPF,BRIP1,MAPT,NDC80,KIF14,NCAPH,NUF2
GO:BP	regulation of mitotic cell cycle	GO:0007346	FALSE	0.00142461	2.8463	496	100	13	21031	MKI67,CDC14A,KNL1,TEX14,CENPF,CLSPN,EIF4E,CRADD,BCL2,NDC80,KIF14,STIL,NUF2
GO:BP	cell cycle	GO:0007049	FALSE	0.00200214	2.6985	1819	100	25	21031	BIN3,DIAPH3,MKI67,CDC14A,ASPM,TOP2A,KNL1,TEX14,CENPF,STMN1,BRIP1,CLSPN,EIF4E,CENPM,CRADD,BCL2,UHRF1,MCMDC2,NDC80,OVOL2,KIF14,STIL,NCAPH,NUF2,OIP5
GO:BP	mitotic cell cycle phase transition	GO:0044772	FALSE	0.00216464	2.66461	432	100	12	21031	CDC14A,KNL1,TEX14,CENPF,CLSPN,EIF4E,CRADD,BCL2,NDC80,KIF14,STIL,NUF2
GO:BP	regulation of cell cycle phase transition	GO:1901987	FALSE	0.00221767	2.6541	433	100	12	21031	CDC14A,KNL1,TEX14,CENPF,BRIP1,CLSPN,CRADD,BCL2,NDC80,KIF14,STIL,NUF2
GO:BP	B cell receptor signaling pathway	GO:0050853	TRUE	0.00240865	2.61823	71	100	6	21031	IGLC3,IGHA1,IGHM,VAV3,IGHG1,BCL2
GO:BP	regulation of chromosome separation	GO:1905818	FALSE	0.00307995	2.51146	74	100	6	21031	KNL1,TEX14,CENPF,NDC80,NCAPH,NUF2
GO:BP	nuclear division	GO:0000280	FALSE	0.00309115	2.50988	447	100	12	21031	MKI67,CDC14A,ASPM,TOP2A,KNL1,TEX14,CENPF,BRIP1,NDC80,KIF14,NCAPH,NUF2
GO:BP	cell cycle phase transition	GO:0044770	FALSE	0.00345206	2.46192	537	100	13	21031	CDC14A,KNL1,TEX14,CENPF,BRIP1,CLSPN,EIF4E,CRADD,BCL2,NDC80,KIF14,STIL,NUF2
GO:BP	immune response-activating cell surface receptor signaling pathway	GO:0002429	FALSE	0.00353535	2.45157	299	100	10	21031	IGLC3,IGHA1,PELI1,IGHM,VAV3,IGHG1,PDE4D,GBP1,NR4A3,BCL2
GO:BP	chromosome organization	GO:0051276	FALSE	0.00398403	2.39968	635	100	14	21031	TOP2A,KNL1,TEX14,CENPF,BRIP1,MAPT,MCMDC2,NDC80,NAF1,KIF14,NCAPH,NUF2,HELB,OIP5
GO:BP	mitotic cell cycle process	GO:1903047	FALSE	0.00506009	2.29584	745	100	15	21031	MKI67,CDC14A,KNL1,TEX14,CENPF,STMN1,CLSPN,EIF4E,CRADD,BCL2,NDC80,KIF14,STIL,NCAPH,NUF2
GO:BP	chromosome separation	GO:0051304	FALSE	0.00525308	2.27959	81	100	6	21031	KNL1,TEX14,CENPF,NDC80,NCAPH,NUF2
GO:BP	negative regulation of mitotic cell cycle phase transition	GO:1901991	FALSE	0.00531293	2.27467	181	100	8	21031	KNL1,TEX14,CENPF,CLSPN,CRADD,BCL2,NDC80,NUF2
GO:BP	mitotic spindle checkpoint signaling	GO:0071174	FALSE	0.00560965	2.25106	46	100	5	21031	KNL1,TEX14,CENPF,NDC80,NUF2
GO:BP	spindle assembly checkpoint signaling	GO:0071173	FALSE	0.00560965	2.25106	46	100	5	21031	KNL1,TEX14,CENPF,NDC80,NUF2
GO:BP	mitotic spindle assembly checkpoint signaling	GO:0007094	FALSE	0.00560965	2.25106	46	100	5	21031	KNL1,TEX14,CENPF,NDC80,NUF2
GO:BP	regulation of chromosome segregation	GO:0051983	FALSE	0.00601152	2.22102	129	100	7	21031	MKI67,KNL1,TEX14,CENPF,NDC80,NCAPH,NUF2
GO:BP	nuclear chromosome segregation	GO:0098813	FALSE	0.00613377	2.21227	318	100	10	21031	ASPM,TOP2A,KNL1,TEX14,CENPF,BRIP1,NDC80,KIF14,NCAPH,NUF2
GO:BP	regulation of chromosome organization	GO:0033044	FALSE	0.00620244	2.20744	248	100	9	21031	TOP2A,KNL1,TEX14,CENPF,MAPT,NDC80,NAF1,NCAPH,NUF2
GO:BP	spindle checkpoint signaling	GO:0031577	FALSE	0.00625389	2.20385	47	100	5	21031	KNL1,TEX14,CENPF,NDC80,NUF2
GO:BP	negative regulation of sister chromatid segregation	GO:0033046	FALSE	0.00695488	2.15771	48	100	5	21031	KNL1,TEX14,CENPF,NDC80,NUF2
GO:BP	negative regulation of mitotic sister chromatid segregation	GO:0033048	FALSE	0.00695488	2.15771	48	100	5	21031	KNL1,TEX14,CENPF,NDC80,NUF2
GO:BP	negative regulation of mitotic sister chromatid separation	GO:2000816	FALSE	0.00695488	2.15771	48	100	5	21031	KNL1,TEX14,CENPF,NDC80,NUF2
GO:BP	negative regulation of mitotic metaphase/anaphase transition	GO:0045841	FALSE	0.00695488	2.15771	48	100	5	21031	KNL1,TEX14,CENPF,NDC80,NUF2
GO:BP	immune response-regulating cell surface receptor signaling pathway	GO:0002768	FALSE	0.00785926	2.10462	327	100	10	21031	IGLC3,IGHA1,PELI1,IGHM,VAV3,IGHG1,PDE4D,GBP1,NR4A3,BCL2
GO:BP	antigen receptor-mediated signaling pathway	GO:0050851	FALSE	0.00792301	2.10111	191	100	8	21031	IGLC3,IGHA1,IGHM,VAV3,IGHG1,PDE4D,GBP1,BCL2
GO:BP	negative regulation of metaphase/anaphase transition of cell cycle	GO:1902100	FALSE	0.0085413	2.06848	50	100	5	21031	KNL1,TEX14,CENPF,NDC80,NUF2
GO:BP	negative regulation of chromosome segregation	GO:0051985	FALSE	0.0085413	2.06848	50	100	5	21031	KNL1,TEX14,CENPF,NDC80,NUF2
GO:BP	negative regulation of chromosome separation	GO:1905819	FALSE	0.0085413	2.06848	50	100	5	21031	KNL1,TEX14,CENPF,NDC80,NUF2
GO:BP	negative regulation of cell cycle phase transition	GO:1901988	FALSE	0.00911782	2.04011	260	100	9	21031	KNL1,TEX14,CENPF,BRIP1,CLSPN,CRADD,BCL2,NDC80,NUF2
GO:BP	meiotic nuclear division	GO:0140013	FALSE	0.00995877	2.00179	197	100	8	21031	ASPM,TOP2A,KNL1,TEX14,BRIP1,NDC80,NCAPH,NUF2
GO:BP	cell cycle checkpoint signaling	GO:0000075	FALSE	0.00995877	2.00179	197	100	8	21031	KNL1,TEX14,CENPF,BRIP1,CLSPN,CRADD,NDC80,NUF2
GO:BP	regulation of response to stimulus	GO:0048583	TRUE	0.0107276	1.9695	3939	100	38	21031	IGLC3,TANK,IGHA1,PELI1,MLLT3,TFRC,ASPM,HOMER1,KNL1,IGHM,VAV3,IGHG1,SESN3,PDE4D,RBPJ,RALGAPA2,STMN1,KLB,DUSP16,GBP1,CRADD,NR4A3,BCL2,MAPT,GCH1,ISG15,NDC80,FABP4,HIST1H2BJ,PDE3B,ARHGAP11B,OVOL2,KIF14,DEPDC1B,TMEM131L,GRK7,HELB,CACNG7
GO:BP	meiotic chromosome segregation	GO:0045132	FALSE	0.0117841	1.9287	93	100	6	21031	ASPM,KNL1,BRIP1,NDC80,NCAPH,NUF2
GO:BP	regulation of mitotic sister chromatid segregation	GO:0033047	FALSE	0.0125586	1.90106	54	100	5	21031	KNL1,TEX14,CENPF,NDC80,NUF2
GO:BP	negative regulation of chromosome organization	GO:2001251	FALSE	0.0133338	1.87505	95	100	6	21031	TOP2A,KNL1,TEX14,CENPF,NDC80,NUF2
GO:BP	mitotic cell cycle checkpoint signaling	GO:0007093	FALSE	0.0136547	1.86472	146	100	7	21031	KNL1,TEX14,CENPF,CLSPN,CRADD,NDC80,NUF2
GO:BP	negative regulation of mitotic nuclear division	GO:0045839	FALSE	0.0150552	1.82231	56	100	5	21031	KNL1,TEX14,CENPF,NDC80,NUF2
GO:BP	mitotic nuclear division	GO:0140014	FALSE	0.0161267	1.79246	279	100	9	21031	MKI67,CDC14A,KNL1,TEX14,CENPF,NDC80,KIF14,NCAPH,NUF2
GO:BP	regulation of cell cycle process	GO:0010564	FALSE	0.0180006	1.74471	724	100	14	21031	MKI67,CDC14A,KNL1,TEX14,CENPF,BRIP1,CLSPN,CRADD,BCL2,NDC80,KIF14,STIL,NCAPH,NUF2
GO:BP	negative regulation of organelle organization	GO:0010639	FALSE	0.0187496	1.72701	361	100	10	21031	DIAPH3,TFRC,TOP2A,KNL1,TEX14,CENPF,STMN1,MAPT,NDC80,NUF2
GO:BP	regulation of mitotic sister chromatid separation	GO:0010965	FALSE	0.0195107	1.70973	59	100	5	21031	KNL1,TEX14,CENPF,NDC80,NUF2
GO:BP	metaphase chromosome alignment	GO:0051310	FALSE	0.0201129	1.69653	102	100	6	21031	KNL1,TEX14,CENPF,NDC80,KIF14,NUF2
GO:BP	meiotic cell cycle process	GO:1903046	FALSE	0.0216381	1.66478	219	100	8	21031	ASPM,TOP2A,KNL1,TEX14,BRIP1,NDC80,NCAPH,NUF2
GO:BP	meiotic cell cycle	GO:0051321	FALSE	0.0219893	1.65779	290	100	9	21031	ASPM,TOP2A,KNL1,TEX14,BRIP1,MCMDC2,NDC80,NCAPH,NUF2
GO:BP	mitotic sister chromatid separation	GO:0051306	FALSE	0.0249358	1.60318	62	100	5	21031	KNL1,TEX14,CENPF,NDC80,NUF2
GO:BP	negative regulation of nuclear division	GO:0051784	FALSE	0.0269839	1.5689	63	100	5	21031	KNL1,TEX14,CENPF,NDC80,NUF2
GO:BP	negative regulation of cell cycle process	GO:0010948	FALSE	0.0303765	1.51746	302	100	9	21031	KNL1,TEX14,CENPF,BRIP1,CLSPN,CRADD,BCL2,NDC80,NUF2
GO:BP	sister chromatid segregation	GO:0000819	FALSE	0.0308765	1.51037	230	100	8	21031	TOP2A,KNL1,TEX14,CENPF,NDC80,KIF14,NCAPH,NUF2
GO:BP	negative regulation of mitotic cell cycle	GO:0045930	FALSE	0.0328699	1.4832	232	100	8	21031	KNL1,TEX14,CENPF,CLSPN,CRADD,BCL2,NDC80,NUF2
GO:BP	cellular response to stimulus	GO:0051716	TRUE	0.0344692	1.46257	7394	100	56	21031	IGLC3,TANK,IGHA1,DIAPH3,PELI1,MLLT3,TFRC,ASPM,HOMER1,TOP2A,PLCL1,KNL1,IGHM,TEX14,VAV3,IGHG1,SESN3,PDE4D,NIBAN1,CENPF,RBPJ,RALGAPA2,STMN1,KLB,BRIP1,CLSPN,EIF4E,ITGA2B,DUSP16,HERPUD2,MT1X,GBP1,CRADD,NR4A3,BCL2,RNASEH2A,UHRF1,MAPT,GCH1,MCMDC2,ISG15,NDC80,FABP4,HIST1H2BJ,CCDC62,PDE3B,ARHGAP11B,OVOL2,KIF14,DEPDC1B,STIL,TMEM131L,GRK7,NUF2,HELB,CACNG7
GO:BP	regulation of cell cycle	GO:0051726	FALSE	0.0364002	1.4389	1105	100	17	21031	MKI67,CDC14A,ASPM,KNL1,TEX14,CENPF,BRIP1,CLSPN,EIF4E,CRADD,BCL2,NDC80,OVOL2,KIF14,STIL,NCAPH,NUF2
GO:BP	establishment of chromosome localization	GO:0051303	FALSE	0.0420104	1.37664	116	100	6	21031	KNL1,TEX14,CENPF,NDC80,KIF14,NUF2
GO:BP	mitotic cell cycle	GO:0000278	FALSE	0.0453655	1.34327	895	100	15	21031	MKI67,CDC14A,KNL1,TEX14,CENPF,STMN1,CLSPN,EIF4E,CRADD,BCL2,NDC80,KIF14,STIL,NCAPH,NUF2
GO:BP	regulation of mitotic nuclear division	GO:0007088	FALSE	0.0462982	1.33444	118	100	6	21031	MKI67,KNL1,TEX14,CENPF,NDC80,NUF2

## Sheet: SD6
Supplementary Data 6. myeloid share gene enrichment
source	term_name	term_id	highlighted	adjusted_p_value	negative_log10_of_adjusted_p_value	term_size	query_size	intersection_size	effective_domain_size	intersections
GO:BP	multicellular organismal process	GO:0032501	TRUE	1.0292e-13	12.9875	7669	137	98	21031	SEMA3A,PREX2,ITGB8,VWF,FGF10,PTPRB,CLIC5,EMCN,FCER1A,MS4A1,CD79A,RBM47,BCL11B,F13A1,BANK1,CALCRL,SEMA5A,CCL5,SLC8A1,MFAP5,PCSK6,LMCD1,RTN1,RHOJ,ABI3BP,ADGRB3,TNXB,COL5A2,CD1C,SLC11A1,GJB2,FLT3,VEGFC,SNTG2,CRTAC1,ADAMTSL1,WDFY4,MARCO,MSR1,AQP9,THBS2,SLCO2B1,SMOC1,NEGR1,ITGAX,CTLA4,POSTN,TANC1,ADAMTS9,EDNRA,SEMA3C,PTGIS,ABCC9,PLVAP,PCDH17,OLR1,FCRL1,PDE3A,ADAMTS5,ENPP1,IGF1,EFNA5,COL6A1,THEMIS,SFRP…
GO:BP	cell adhesion	GO:0007155	FALSE	1.2181e-11	10.9143	1512	137	40	21031	ITGB8,VWF,EMCN,SEMA5A,CCL5,ITGBL1,SKAP1,ABI3BP,TNXB,ADAMTSL1,MAGI1,THBS2,NEGR1,ITGAX,CTLA4,POSTN,ADAMTS9,FBLN2,PGM5,PCDH17,OLR1,IGF1,EFNA5,COL6A1,SFRP1,MERTK,LYN,PRKCQ,NTN4,NUAK1,CD86,ITGA9,CNTNAP3B,IL7R,BMP6,FOLR2,MCAM,MMRN1,COL14A1,COL15A1
GO:BP	response to stimulus	GO:0050896	FALSE	2.3357e-10	9.63158	8976	137	101	21031	SEMA3A,PREX2,ITGB8,VWF,FGF10,ADGRL4,CLIC5,FCER1A,MS4A1,CD79A,RBM47,F13A1,CD163,BANK1,CALCRL,SEMA5A,ADGRL2,RAPGEF4,CCL5,MCTP1,SLC8A1,PCSK6,LMCD1,ZNF385B,ITGBL1,BLK,SKAP1,RHOJ,ABI3BP,ADGRB3,TNXB,COL5A2,CD1C,SLC11A1,GJB2,FLT3,VEGFC,ME1,WDFY4,MARCO,MSR1,MAGI1,AQP9,SLCO2B1,GPC6,ITGAX,CTLA4,POSTN,TANC1,ADAMTS9,EDNRA,SEMA3C,ADCY4,PTGIS,ABCC9,PLVAP,OLR1,PDE3A,ADAMTS5,ENPP1,PDE1A,RALGPS2,IGF1,RGS5,CNKSR3,…
GO:BP	cell surface receptor signaling pathway	GO:0007166	FALSE	2.29175e-09	8.63983	2799	137	51	21031	SEMA3A,ITGB8,FGF10,ADGRL4,FCER1A,MS4A1,CD79A,RBM47,BANK1,CALCRL,SEMA5A,ADGRL2,CCL5,PCSK6,ITGBL1,BLK,SKAP1,ADGRB3,TNXB,FLT3,VEGFC,MARCO,MAGI1,ITGAX,CTLA4,POSTN,EDNRA,SEMA3C,PLVAP,ENPP1,IGF1,EFNA5,THEMIS,SFRP1,NOTCH3,MERTK,LYN,COL4A1,PRKCQ,SFRP4,CD86,ITGA9,IL7R,MZB1,BMP6,SHANK3,ACKR1,EYA2,ASPN,FCRL5,TLR2
GO:BP	anatomical structure development	GO:0048856	FALSE	6.9268e-08	7.15947	5899	137	75	21031	SEMA3A,PREX2,ITGB8,FGF10,PTPRB,EMCN,MS4A1,CD79A,RBM47,BCL11B,CALCRL,SEMA5A,SLC8A1,MFAP5,PCSK6,RTN1,RHOJ,ABI3BP,ADGRB3,TNXB,COL5A2,GJB2,FLT3,VEGFC,SNTG2,CRTAC1,ADAMTSL1,THBS2,SMOC1,NEGR1,ITGAX,CTLA4,POSTN,TANC1,ADAMTS9,EDNRA,SEMA3C,PGM5,PTGIS,ABCC9,PCDH17,PDE3A,ADAMTS5,ENPP1,IGF1,EFNA5,COL6A1,THEMIS,SFRP1,NOTCH3,MERTK,LYN,STOX2,POU2AF1,COL4A1,PRKCQ,NTN4,DNASE1L3,PI16,SFRP4,CD86,IL7R,AFF3,BMP6,OLFM…
GO:BP	multicellular organism development	GO:0007275	FALSE	7.01781e-08	7.1538	4643	137	65	21031	SEMA3A,PREX2,ITGB8,FGF10,PTPRB,EMCN,BCL11B,CALCRL,SEMA5A,SLC8A1,MFAP5,PCSK6,RTN1,RHOJ,ABI3BP,ADGRB3,TNXB,COL5A2,GJB2,VEGFC,SNTG2,CRTAC1,ADAMTSL1,THBS2,SMOC1,NEGR1,ITGAX,CTLA4,POSTN,ADAMTS9,EDNRA,SEMA3C,PTGIS,ABCC9,PCDH17,ADAMTS5,ENPP1,IGF1,EFNA5,COL6A1,SFRP1,NOTCH3,MERTK,LYN,STOX2,COL4A1,PRKCQ,NTN4,PI16,SFRP4,CD86,IL7R,AFF3,BMP6,OLFM3,SHANK3,EYA2,MCAM,MAP1B,LDB2,ASPN,COL14A1,TLR2,COL15A1,C1QA
GO:BP	developmental process	GO:0032502	FALSE	8.27413e-08	7.08228	6453	137	79	21031	SEMA3A,PREX2,ITGB8,FGF10,PTPRB,EMCN,MS4A1,CD79A,RBM47,BCL11B,CALCRL,SEMA5A,SLC8A1,MFAP5,PCSK6,RTN1,BLK,RHOJ,ABI3BP,ADGRB3,TNXB,COL5A2,GJB2,FLT3,VEGFC,SNTG2,CRTAC1,ADAMTSL1,MSR1,THBS2,SMOC1,NEGR1,ITGAX,CTLA4,POSTN,TANC1,ADAMTS9,EDNRA,SEMA3C,PGM5,PTGIS,ABCC9,PLVAP,PCDH17,PDE3A,ADAMTS5,ENPP1,IGF1,EFNA5,COL6A1,THEMIS,SFRP1,NOTCH3,MERTK,LYN,STOX2,POU2AF1,COL4A1,PRKCQ,NTN4,DNASE1L3,PI16,SFRP4,CD86,IL7R…
GO:BP	cell activation	GO:0001775	FALSE	1.20114e-07	6.92041	1092	137	29	21031	ITGB8,VWF,FGF10,FCER1A,MS4A1,CD79A,BCL11B,BANK1,CCL5,CD1C,SLC11A1,FLT3,WDFY4,CTLA4,FCRL1,IGF1,THEMIS,SFRP1,MERTK,LYN,POU2AF1,PRKCQ,DNASE1L3,CD86,IL7R,MZB1,MMRN1,TLR2,C1QA
GO:BP	leukocyte activation	GO:0045321	FALSE	1.22712e-07	6.91111	946	137	27	21031	ITGB8,FGF10,FCER1A,MS4A1,CD79A,BCL11B,BANK1,CCL5,CD1C,SLC11A1,FLT3,WDFY4,CTLA4,FCRL1,IGF1,THEMIS,SFRP1,MERTK,LYN,POU2AF1,PRKCQ,DNASE1L3,CD86,IL7R,MZB1,TLR2,C1QA
GO:BP	cell differentiation	GO:0030154	FALSE	1.56088e-07	6.80663	4366	137	62	21031	SEMA3A,PREX2,ITGB8,FGF10,PTPRB,MS4A1,CD79A,RBM47,BCL11B,SEMA5A,SLC8A1,MFAP5,RTN1,BLK,ABI3BP,ADGRB3,TNXB,COL5A2,FLT3,VEGFC,CRTAC1,ADAMTSL1,MSR1,SMOC1,NEGR1,CTLA4,POSTN,TANC1,ADAMTS9,EDNRA,SEMA3C,PGM5,PDE3A,ADAMTS5,ENPP1,IGF1,EFNA5,COL6A1,THEMIS,SFRP1,NOTCH3,MERTK,LYN,POU2AF1,COL4A1,PRKCQ,NTN4,DNASE1L3,PI16,SFRP4,CD86,IL7R,BMP6,OLFM3,SHANK3,EYA2,MAP1B,COL14A1,TLR2,COL15A1,C1QA,RAI14
GO:BP	cellular developmental process	GO:0048869	FALSE	1.57643e-07	6.80232	4367	137	62	21031	SEMA3A,PREX2,ITGB8,FGF10,PTPRB,MS4A1,CD79A,RBM47,BCL11B,SEMA5A,SLC8A1,MFAP5,RTN1,BLK,ABI3BP,ADGRB3,TNXB,COL5A2,FLT3,VEGFC,CRTAC1,ADAMTSL1,MSR1,SMOC1,NEGR1,CTLA4,POSTN,TANC1,ADAMTS9,EDNRA,SEMA3C,PGM5,PDE3A,ADAMTS5,ENPP1,IGF1,EFNA5,COL6A1,THEMIS,SFRP1,NOTCH3,MERTK,LYN,POU2AF1,COL4A1,PRKCQ,NTN4,DNASE1L3,PI16,SFRP4,CD86,IL7R,BMP6,OLFM3,SHANK3,EYA2,MAP1B,COL14A1,TLR2,COL15A1,C1QA,RAI14
GO:BP	regulation of multicellular organismal process	GO:0051239	FALSE	2.37647e-07	6.62407	2955	137	49	21031	SEMA3A,ITGB8,FGF10,RBM47,BANK1,SEMA5A,CCL5,SLC8A1,LMCD1,RHOJ,ABI3BP,ADGRB3,TNXB,SLC11A1,VEGFC,THBS2,ITGAX,CTLA4,POSTN,ADAMTS9,EDNRA,SEMA3C,PTGIS,ABCC9,PDE3A,ADAMTS5,ENPP1,IGF1,EFNA5,SFRP1,MERTK,LYN,POU2AF1,PRKCQ,NTN4,PI16,SFRP4,CD86,ITGA9,IL7R,MZB1,BMP6,SHANK3,ACKR1,MAP1B,MMRN1,ASPN,COL14A1,TLR2
GO:BP	cell communication	GO:0007154	FALSE	5.06077e-07	6.29578	6537	137	78	21031	SEMA3A,PREX2,ITGB8,VWF,FGF10,ADGRL4,FCER1A,MS4A1,CD79A,RBM47,BANK1,CALCRL,SEMA5A,ADGRL2,RAPGEF4,CCL5,MCTP1,SLC8A1,PCSK6,LMCD1,ZNF385B,ITGBL1,BLK,SKAP1,RHOJ,ADGRB3,TNXB,GJB2,FLT3,VEGFC,MARCO,MAGI1,MYRIP,GPC6,ITGAX,CTLA4,POSTN,EDNRA,SEMA3C,ADCY4,PTGIS,PLVAP,PCDH17,PDE3A,ENPP1,PDE1A,RALGPS2,IGF1,RGS5,CNKSR3,EFNA5,THEMIS,SFRP1,NOTCH3,MERTK,LYN,COL4A1,PRKCQ,NTN4,NUAK1,SFRP4,CD86,ITGA9,IL7R,MZB1,BMP6,O…
GO:BP	signaling	GO:0023052	FALSE	7.32245e-07	6.13534	6447	137	77	21031	SEMA3A,PREX2,ITGB8,VWF,FGF10,ADGRL4,FCER1A,MS4A1,CD79A,RBM47,BANK1,CALCRL,SEMA5A,ADGRL2,RAPGEF4,CCL5,MCTP1,SLC8A1,PCSK6,LMCD1,ZNF385B,ITGBL1,BLK,SKAP1,RHOJ,ADGRB3,TNXB,GJB2,FLT3,VEGFC,MARCO,MAGI1,MYRIP,GPC6,ITGAX,CTLA4,POSTN,EDNRA,SEMA3C,ADCY4,PTGIS,PLVAP,PCDH17,PDE3A,ENPP1,PDE1A,RALGPS2,IGF1,RGS5,CNKSR3,EFNA5,THEMIS,SFRP1,NOTCH3,MERTK,LYN,COL4A1,PRKCQ,NTN4,NUAK1,SFRP4,CD86,ITGA9,IL7R,MZB1,BMP6,O…
GO:BP	anatomical structure morphogenesis	GO:0009653	FALSE	1.3334e-06	5.87504	2684	137	45	21031	SEMA3A,PREX2,ITGB8,FGF10,PTPRB,EMCN,BCL11B,CALCRL,SEMA5A,MFAP5,RHOJ,ADGRB3,COL5A2,VEGFC,ADAMTSL1,THBS2,ITGAX,POSTN,TANC1,ADAMTS9,EDNRA,SEMA3C,PGM5,PTGIS,ABCC9,ADAMTS5,EFNA5,COL6A1,SFRP1,NOTCH3,COL4A1,PRKCQ,NTN4,SFRP4,IL7R,AFF3,BMP6,OLFM3,SHANK3,EYA2,MCAM,MAP1B,ASPN,TLR2,COL15A1
GO:BP	angiogenesis	GO:0001525	FALSE	3.55624e-06	5.44901	538	137	19	21031	ITGB8,FGF10,PTPRB,EMCN,CALCRL,SEMA5A,RHOJ,ADGRB3,VEGFC,THBS2,ITGAX,ADAMTS9,EDNRA,PTGIS,SFRP1,NOTCH3,COL4A1,MCAM,COL15A1
GO:BP	anatomical structure formation involved in morphogenesis	GO:0048646	FALSE	3.60806e-06	5.44273	1183	137	28	21031	ITGB8,FGF10,PTPRB,EMCN,CALCRL,SEMA5A,RHOJ,ADGRB3,COL5A2,VEGFC,THBS2,ITGAX,TANC1,ADAMTS9,EDNRA,SEMA3C,PGM5,PTGIS,ADAMTS5,COL6A1,SFRP1,NOTCH3,COL4A1,SHANK3,EYA2,MCAM,TLR2,COL15A1
GO:BP	cellular response to stimulus	GO:0051716	FALSE	4.90137e-06	5.30968	7394	137	82	21031	SEMA3A,PREX2,ITGB8,VWF,FGF10,ADGRL4,FCER1A,MS4A1,CD79A,RBM47,BANK1,CALCRL,SEMA5A,ADGRL2,RAPGEF4,CCL5,MCTP1,SLC8A1,PCSK6,LMCD1,ZNF385B,ITGBL1,BLK,SKAP1,RHOJ,ADGRB3,TNXB,COL5A2,SLC11A1,GJB2,FLT3,VEGFC,MARCO,MSR1,MAGI1,AQP9,SLCO2B1,GPC6,ITGAX,CTLA4,POSTN,EDNRA,SEMA3C,ADCY4,PTGIS,PLVAP,PDE3A,ENPP1,PDE1A,RALGPS2,IGF1,RGS5,CNKSR3,EFNA5,COL6A1,THEMIS,SFRP1,NOTCH3,MERTK,LYN,COL4A1,PRKCQ,NUAK1,RAB31,SFRP4…
GO:BP	circulatory system development	GO:0072359	FALSE	6.01147e-06	5.22102	1130	137	27	21031	ITGB8,FGF10,PTPRB,EMCN,CALCRL,SEMA5A,SLC8A1,RHOJ,ABI3BP,ADGRB3,VEGFC,THBS2,ITGAX,ADAMTS9,EDNRA,SEMA3C,PTGIS,ABCC9,ADAMTS5,IGF1,SFRP1,NOTCH3,COL4A1,PI16,MCAM,COL14A1,COL15A1
GO:BP	signal transduction	GO:0007165	FALSE	8.82849e-06	5.05411	5959	137	71	21031	SEMA3A,PREX2,ITGB8,VWF,FGF10,ADGRL4,FCER1A,MS4A1,CD79A,RBM47,BANK1,CALCRL,SEMA5A,ADGRL2,RAPGEF4,CCL5,MCTP1,SLC8A1,PCSK6,LMCD1,ZNF385B,ITGBL1,BLK,SKAP1,RHOJ,ADGRB3,TNXB,FLT3,VEGFC,MARCO,MAGI1,GPC6,ITGAX,CTLA4,POSTN,EDNRA,SEMA3C,ADCY4,PTGIS,PLVAP,PDE3A,ENPP1,PDE1A,RALGPS2,IGF1,RGS5,CNKSR3,EFNA5,THEMIS,SFRP1,NOTCH3,MERTK,LYN,COL4A1,PRKCQ,NUAK1,SFRP4,CD86,ITGA9,IL7R,MZB1,BMP6,OLFM3,SHANK3,ACKR1,EYA2,…
GO:BP	system development	GO:0048731	FALSE	9.6775e-06	5.01424	3973	137	55	21031	SEMA3A,PREX2,ITGB8,FGF10,PTPRB,EMCN,BCL11B,CALCRL,SEMA5A,SLC8A1,MFAP5,RTN1,RHOJ,ABI3BP,ADGRB3,TNXB,COL5A2,VEGFC,SNTG2,CRTAC1,ADAMTSL1,THBS2,SMOC1,NEGR1,ITGAX,POSTN,ADAMTS9,EDNRA,SEMA3C,PTGIS,ABCC9,PCDH17,ADAMTS5,IGF1,EFNA5,SFRP1,NOTCH3,MERTK,LYN,COL4A1,PRKCQ,NTN4,PI16,SFRP4,IL7R,BMP6,OLFM3,SHANK3,MCAM,MAP1B,LDB2,COL14A1,TLR2,COL15A1,C1QA
GO:BP	lymphocyte activation	GO:0046649	FALSE	1.16982e-05	4.93188	783	137	22	21031	FGF10,MS4A1,CD79A,BCL11B,BANK1,CCL5,CD1C,SLC11A1,FLT3,WDFY4,CTLA4,FCRL1,IGF1,THEMIS,SFRP1,MERTK,LYN,POU2AF1,PRKCQ,CD86,IL7R,MZB1
GO:BP	blood vessel development	GO:0001568	FALSE	1.43441e-05	4.84333	721	137	21	21031	ITGB8,FGF10,PTPRB,EMCN,CALCRL,SEMA5A,RHOJ,ADGRB3,VEGFC,THBS2,ITGAX,ADAMTS9,EDNRA,SEMA3C,PTGIS,ABCC9,SFRP1,NOTCH3,COL4A1,MCAM,COL15A1
GO:BP	cell development	GO:0048468	FALSE	2.05115e-05	4.688	2819	137	44	21031	SEMA3A,PREX2,ITGB8,MS4A1,CD79A,RBM47,BCL11B,SEMA5A,SLC8A1,MFAP5,ADGRB3,TNXB,FLT3,VEGFC,CRTAC1,ADAMTSL1,NEGR1,CTLA4,POSTN,EDNRA,SEMA3C,PGM5,PDE3A,IGF1,EFNA5,THEMIS,SFRP1,NOTCH3,MERTK,LYN,POU2AF1,PRKCQ,NTN4,DNASE1L3,PI16,CD86,IL7R,BMP6,OLFM3,SHANK3,MAP1B,COL14A1,TLR2,C1QA
GO:BP	vasculature development	GO:0001944	FALSE	2.97239e-05	4.52689	752	137	21	21031	ITGB8,FGF10,PTPRB,EMCN,CALCRL,SEMA5A,RHOJ,ADGRB3,VEGFC,THBS2,ITGAX,ADAMTS9,EDNRA,SEMA3C,PTGIS,ABCC9,SFRP1,NOTCH3,COL4A1,MCAM,COL15A1
GO:BP	blood vessel morphogenesis	GO:0048514	FALSE	3.99913e-05	4.39803	625	137	19	21031	ITGB8,FGF10,PTPRB,EMCN,CALCRL,SEMA5A,RHOJ,ADGRB3,VEGFC,THBS2,ITGAX,ADAMTS9,EDNRA,PTGIS,SFRP1,NOTCH3,COL4A1,MCAM,COL15A1
GO:BP	regulation of multicellular organismal development	GO:2000026	FALSE	4.16567e-05	4.38032	1411	137	29	21031	SEMA3A,ITGB8,FGF10,SEMA5A,SLC8A1,RHOJ,ADGRB3,VEGFC,THBS2,ITGAX,CTLA4,ADAMTS9,SEMA3C,PTGIS,ENPP1,IGF1,EFNA5,SFRP1,LYN,PI16,SFRP4,CD86,IL7R,BMP6,SHANK3,MAP1B,ASPN,COL14A1,TLR2
GO:BP	cellular response to endogenous stimulus	GO:0071495	FALSE	5.74884e-05	4.24042	1432	137	29	21031	ITGB8,FGF10,CCL5,SLC8A1,PCSK6,TNXB,COL5A2,GJB2,FLT3,VEGFC,AQP9,POSTN,EDNRA,PDE3A,ENPP1,IGF1,EFNA5,COL6A1,SFRP1,LYN,COL4A1,PRKCQ,RAB31,SFRP4,MZB1,BMP6,FOLR2,MAP1B,ASPN
GO:BP	regulation of biological quality	GO:0065008	FALSE	8.40506e-05	4.07546	2846	137	43	21031	SEMA3A,VWF,FGF10,RBM47,F13A1,SEMA5A,RAPGEF4,CCL5,MCTP1,SLC8A1,PCSK6,BLK,RHOJ,ADGRB3,SLC11A1,VEGFC,THBS2,MYRIP,GPC6,NEGR1,POSTN,TANC1,EDNRA,SEMA3C,ABCC9,PLVAP,DMXL2,PDE3A,IGF1,EFNA5,SFRP1,MERTK,LYN,PRKCQ,ITGA9,IL7R,BMP6,BACE2,SHANK3,EYA2,MAP1B,MMRN1,TLR2
GO:BP	cell-substrate adhesion	GO:0031589	FALSE	0.000120464	3.91914	351	137	14	21031	ITGB8,VWF,SKAP1,ABI3BP,TNXB,ITGAX,POSTN,ADAMTS9,FBLN2,EFNA5,SFRP1,MERTK,NTN4,ITGA9
GO:BP	response to endogenous stimulus	GO:0009719	FALSE	0.000142639	3.84576	1678	137	31	21031	ITGB8,FGF10,CCL5,SLC8A1,PCSK6,TNXB,COL5A2,GJB2,FLT3,VEGFC,ME1,AQP9,POSTN,EDNRA,PDE3A,ENPP1,IGF1,EFNA5,COL6A1,SFRP1,LYN,COL4A1,PRKCQ,RAB31,SFRP4,MZB1,BMP6,FOLR2,MAP1B,ASPN,TLR2
GO:BP	lymphocyte proliferation	GO:0046651	FALSE	0.000188107	3.72559	308	137	13	21031	FGF10,MS4A1,CD79A,CCL5,SLC11A1,FLT3,CTLA4,IGF1,LYN,PRKCQ,CD86,IL7R,MZB1
GO:BP	mononuclear cell proliferation	GO:0032943	FALSE	0.000243799	3.61297	315	137	13	21031	FGF10,MS4A1,CD79A,CCL5,SLC11A1,FLT3,CTLA4,IGF1,LYN,PRKCQ,CD86,IL7R,MZB1
GO:BP	regulation of cell adhesion	GO:0030155	FALSE	0.000257335	3.5895	778	137	20	21031	EMCN,SEMA5A,CCL5,SKAP1,ABI3BP,TNXB,MAGI1,CTLA4,POSTN,FBLN2,IGF1,EFNA5,SFRP1,LYN,PRKCQ,NUAK1,CD86,IL7R,BMP6,MMRN1
GO:BP	response to organic substance	GO:0010033	FALSE	0.000267182	3.57319	2637	137	40	21031	FGF10,RBM47,CALCRL,CCL5,SLC8A1,COL5A2,SLC11A1,GJB2,FLT3,VEGFC,ME1,MSR1,AQP9,POSTN,EDNRA,PTGIS,ABCC9,PLVAP,PDE3A,ENPP1,IGF1,EFNA5,COL6A1,SFRP1,LYN,COL4A1,PRKCQ,RAB31,SFRP4,CD86,IL7R,AFF3,MZB1,BMP6,MRC1,SHANK3,ACKR1,FOLR2,MAP1B,TLR2
GO:BP	extracellular matrix organization	GO:0030198	TRUE	0.000336971	3.47241	324	137	13	21031	COL22A1,ABI3BP,TNXB,COL5A2,ADAMTSL1,SMOC1,POSTN,ADAMTS9,ADAMTS5,COL4A1,NTN4,COL14A1,COL15A1
GO:BP	extracellular structure organization	GO:0043062	FALSE	0.000349081	3.45707	325	137	13	21031	COL22A1,ABI3BP,TNXB,COL5A2,ADAMTSL1,SMOC1,POSTN,ADAMTS9,ADAMTS5,COL4A1,NTN4,COL14A1,COL15A1
GO:BP	external encapsulating structure organization	GO:0045229	FALSE	0.00036158	3.4418	326	137	13	21031	COL22A1,ABI3BP,TNXB,COL5A2,ADAMTSL1,SMOC1,POSTN,ADAMTS9,ADAMTS5,COL4A1,NTN4,COL14A1,COL15A1
GO:BP	regulation of developmental process	GO:0050793	FALSE	0.000364332	3.4385	2455	137	38	21031	SEMA3A,ITGB8,FGF10,BCL11B,SEMA5A,SLC8A1,RHOJ,ABI3BP,ADGRB3,TNXB,COL5A2,VEGFC,MSR1,THBS2,SMOC1,ITGAX,CTLA4,ADAMTS9,SEMA3C,PTGIS,PDE3A,ENPP1,IGF1,EFNA5,SFRP1,NOTCH3,LYN,NTN4,PI16,SFRP4,CD86,IL7R,BMP6,SHANK3,MAP1B,ASPN,COL14A1,TLR2
GO:BP	regulation of response to stimulus	GO:0048583	FALSE	0.000442729	3.35386	3939	137	51	21031	SEMA3A,PREX2,VWF,FGF10,FCER1A,MS4A1,CD79A,RBM47,BANK1,SEMA5A,CCL5,MCTP1,PCSK6,LMCD1,BLK,SKAP1,TNXB,CD1C,SLC11A1,FLT3,VEGFC,MARCO,GPC6,CTLA4,POSTN,SEMA3C,PTGIS,PDE3A,ENPP1,IGF1,RGS5,CNKSR3,THEMIS,SFRP1,LYN,PRKCQ,NUAK1,DNASE1L3,PI16,SFRP4,CD86,IL7R,MZB1,BMP6,SHANK3,EYA2,GPAT3,MMRN1,ASPN,TLR2,C1QA
GO:BP	cellular response to organic substance	GO:0071310	FALSE	0.00049549	3.30496	1971	137	33	21031	RBM47,CALCRL,CCL5,SLC8A1,COL5A2,GJB2,FLT3,VEGFC,MSR1,AQP9,POSTN,EDNRA,PTGIS,PLVAP,PDE3A,ENPP1,IGF1,EFNA5,COL6A1,SFRP1,LYN,COL4A1,PRKCQ,RAB31,CD86,IL7R,MZB1,BMP6,MRC1,ACKR1,FOLR2,MAP1B,TLR2
GO:BP	B cell activation	GO:0042113	FALSE	0.000520999	3.28316	281	137	12	21031	MS4A1,CD79A,BANK1,FLT3,CTLA4,FCRL1,SFRP1,LYN,POU2AF1,CD86,IL7R,MZB1
GO:BP	regulation of biological process	GO:0050789	FALSE	0.000550315	3.25939	12287	137	108	21031	SEMA3A,PREX2,ITGB8,VWF,FGF10,ADGRL4,EMCN,FCER1A,MS4A1,CD79A,RBM47,BCL11B,BANK1,CALCRL,SEMA5A,ADGRL2,RAPGEF4,CCL5,MCTP1,SLC8A1,PCSK6,LMCD1,RTN1,ZNF385B,ITGBL1,BLK,SKAP1,RHOJ,ABI3BP,ADGRB3,TNXB,COL5A2,CD1C,SLC11A1,GJB2,PKIB,FLT3,VEGFC,ME1,MARCO,MSR1,MAGI1,THBS2,PARM1,MYRIP,GPC6,SMOC1,NEGR1,ITGAX,CTLA4,POSTN,TANC1,ADAMTS9,EDNRA,SEMA3C,ADCY4,FBLN2,PTGIS,ABCC9,PLVAP,PCDH17,PDE3A,ADAMTS5,ENPP1,PDE1A,RA…
GO:BP	response to external stimulus	GO:0009605	FALSE	0.000628757	3.20152	2723	137	40	21031	SEMA3A,ITGB8,FGF10,MS4A1,RBM47,BANK1,SEMA5A,CCL5,SLC8A1,BLK,SLC11A1,GJB2,VEGFC,WDFY4,MARCO,ITGAX,POSTN,ADAMTS9,SEMA3C,PTGIS,ABCC9,ADAMTS5,IGF1,EFNA5,SFRP1,LYN,POU2AF1,PRKCQ,NUAK1,DNASE1L3,CD86,ITGA9,IL7R,BMP6,MRC1,FOLR2,MAP1B,MMRN1,TLR2,C1QA
GO:BP	biological regulation	GO:0065007	FALSE	0.000674999	3.1707	12680	137	110	21031	SEMA3A,PREX2,ITGB8,VWF,FGF10,ADGRL4,EMCN,FCER1A,MS4A1,CD79A,RBM47,BCL11B,F13A1,BANK1,CALCRL,SEMA5A,ADGRL2,RAPGEF4,CCL5,MCTP1,SLC8A1,PCSK6,LMCD1,RTN1,ZNF385B,ITGBL1,BLK,SKAP1,RHOJ,ABI3BP,ADGRB3,TNXB,COL5A2,CD1C,SLC11A1,GJB2,PKIB,FLT3,VEGFC,ME1,MARCO,MSR1,MAGI1,THBS2,PARM1,MYRIP,GPC6,SMOC1,NEGR1,ITGAX,CTLA4,POSTN,TANC1,ADAMTS9,EDNRA,SEMA3C,ADCY4,FBLN2,PTGIS,ABCC9,PLVAP,DMXL2,PCDH17,PDE3A,ADAMTS5,EN…
GO:BP	cellular response to organonitrogen compound	GO:0071417	FALSE	0.000784835	3.10522	610	137	17	21031	SLC8A1,COL5A2,GJB2,AQP9,EDNRA,PDE3A,ENPP1,IGF1,COL6A1,SFRP1,LYN,COL4A1,PRKCQ,RAB31,MZB1,FOLR2,MAP1B
GO:BP	leukocyte proliferation	GO:0070661	FALSE	0.000837675	3.07692	351	137	13	21031	FGF10,MS4A1,CD79A,CCL5,SLC11A1,FLT3,CTLA4,IGF1,LYN,PRKCQ,CD86,IL7R,MZB1
GO:BP	cellular response to oxygen-containing compound	GO:1901701	FALSE	0.000967157	3.0145	1179	137	24	21031	CALCRL,SLC8A1,COL5A2,GJB2,AQP9,POSTN,EDNRA,PDE3A,ENPP1,IGF1,EFNA5,COL6A1,SFRP1,LYN,COL4A1,PRKCQ,RAB31,CD86,MZB1,BMP6,MRC1,FOLR2,MAP1B,TLR2
GO:BP	immune system process	GO:0002376	FALSE	0.00104315	2.98165	2776	137	40	21031	ITGB8,FGF10,FCER1A,MS4A1,CD79A,RBM47,BCL11B,BANK1,RAPGEF4,CCL5,BLK,SKAP1,CD1C,SLC11A1,FLT3,VEGFC,WDFY4,MARCO,CTLA4,SEMA3C,PLVAP,OLR1,FCRL1,ENPP1,IGF1,THEMIS,SFRP1,MERTK,LYN,POU2AF1,PRKCQ,DNASE1L3,CD86,ITGA9,IL7R,MZB1,BMP6,MRC1,TLR2,C1QA
GO:BP	positive regulation of biological process	GO:0048518	FALSE	0.00118335	2.92689	6250	137	68	21031	SEMA3A,ITGB8,VWF,FGF10,MS4A1,CD79A,RBM47,BCL11B,BANK1,CALCRL,SEMA5A,RAPGEF4,CCL5,SLC8A1,LMCD1,BLK,SKAP1,RHOJ,ABI3BP,ADGRB3,TNXB,CD1C,SLC11A1,PKIB,FLT3,VEGFC,MARCO,MSR1,MAGI1,THBS2,PARM1,MYRIP,NEGR1,ITGAX,CTLA4,POSTN,ADAMTS9,EDNRA,SEMA3C,FBLN2,PTGIS,PLVAP,PDE3A,IGF1,CNKSR3,EFNA5,THEMIS,SFRP1,NOTCH3,MERTK,LYN,POU2AF1,PRKCQ,RAB31,SFRP4,CD86,IL7R,MZB1,BMP6,SHANK3,FOLR2,EYA2,MCAM,MAP1B,MMRN1,LDB2,TLR2…
GO:BP	regulation of cell differentiation	GO:0045595	FALSE	0.00150227	2.82325	1576	137	28	21031	SEMA3A,FGF10,BCL11B,SEMA5A,ABI3BP,TNXB,COL5A2,VEGFC,MSR1,SMOC1,CTLA4,ADAMTS9,SEMA3C,PDE3A,ENPP1,IGF1,EFNA5,SFRP1,NOTCH3,LYN,PI16,SFRP4,CD86,IL7R,BMP6,SHANK3,MAP1B,TLR2
GO:BP	tube morphogenesis	GO:0035239	FALSE	0.00155022	2.80961	872	137	20	21031	ITGB8,FGF10,PTPRB,EMCN,CALCRL,SEMA5A,RHOJ,ADGRB3,VEGFC,THBS2,ITGAX,ADAMTS9,EDNRA,PTGIS,SFRP1,NOTCH3,COL4A1,SHANK3,MCAM,COL15A1
GO:BP	cell migration	GO:0016477	TRUE	0.00180847	2.74269	1496	137	27	21031	SEMA3A,FGF10,PTPRB,BCL11B,SEMA5A,CCL5,MCTP1,RHOJ,TNXB,VEGFC,GPC6,ITGAX,POSTN,ADAMTS9,EDNRA,SEMA3C,PLVAP,IGF1,SFRP1,MERTK,LYN,PRKCQ,NTN4,ITGA9,MCAM,MAP1B,LDB2
GO:BP	positive regulation of immune system process	GO:0002684	FALSE	0.00201715	2.69526	1054	137	22	21031	FGF10,MS4A1,CD79A,RBM47,BANK1,CCL5,BLK,SKAP1,CD1C,SLC11A1,VEGFC,CTLA4,PLVAP,IGF1,THEMIS,LYN,PRKCQ,CD86,IL7R,MZB1,TLR2,C1QA
GO:BP	positive regulation of developmental process	GO:0051094	FALSE	0.00227903	2.64225	1328	137	25	21031	ITGB8,FGF10,SEMA5A,SLC8A1,ABI3BP,ADGRB3,TNXB,VEGFC,MSR1,THBS2,ITGAX,ADAMTS9,PTGIS,PDE3A,IGF1,EFNA5,SFRP1,LYN,SFRP4,CD86,IL7R,BMP6,SHANK3,MAP1B,TLR2
GO:BP	tissue development	GO:0009888	FALSE	0.00237384	2.62455	2010	137	32	21031	SEMA3A,ITGB8,FGF10,BCL11B,SEMA5A,SLC8A1,TNXB,COL5A2,GJB2,VEGFC,ITGAX,POSTN,ADAMTS9,EDNRA,SEMA3C,PGM5,ADAMTS5,ENPP1,IGF1,COL6A1,SFRP1,COL4A1,NTN4,PI16,SFRP4,BMP6,SHANK3,EYA2,MAP1B,LDB2,ASPN,COL14A1
GO:BP	regulation of cell communication	GO:0010646	FALSE	0.002498	2.60241	3443	137	45	21031	SEMA3A,PREX2,ITGB8,VWF,FGF10,RBM47,BANK1,SEMA5A,RAPGEF4,CCL5,MCTP1,SLC8A1,PCSK6,LMCD1,BLK,TNXB,FLT3,VEGFC,MARCO,MYRIP,GPC6,POSTN,PTGIS,PCDH17,PDE3A,ENPP1,IGF1,RGS5,CNKSR3,EFNA5,SFRP1,LYN,PRKCQ,NUAK1,SFRP4,CD86,IL7R,MZB1,BMP6,SHANK3,EYA2,MAP1B,GPAT3,ASPN,TLR2
GO:BP	positive regulation of cellular process	GO:0048522	FALSE	0.00289262	2.53871	5717	137	63	21031	SEMA3A,ITGB8,VWF,FGF10,MS4A1,RBM47,BCL11B,BANK1,CALCRL,SEMA5A,RAPGEF4,CCL5,LMCD1,BLK,SKAP1,RHOJ,ABI3BP,ADGRB3,TNXB,CD1C,SLC11A1,PKIB,FLT3,VEGFC,MARCO,MSR1,MAGI1,THBS2,PARM1,MYRIP,NEGR1,ITGAX,CTLA4,POSTN,ADAMTS9,EDNRA,SEMA3C,FBLN2,PTGIS,PLVAP,PDE3A,IGF1,EFNA5,SFRP1,NOTCH3,MERTK,LYN,POU2AF1,PRKCQ,RAB31,SFRP4,CD86,IL7R,MZB1,BMP6,SHANK3,FOLR2,EYA2,MCAM,MAP1B,MMRN1,LDB2,TLR2
GO:BP	cellular response to nitrogen compound	GO:1901699	FALSE	0.0029558	2.52932	672	137	17	21031	SLC8A1,COL5A2,GJB2,AQP9,EDNRA,PDE3A,ENPP1,IGF1,COL6A1,SFRP1,LYN,COL4A1,PRKCQ,RAB31,MZB1,FOLR2,MAP1B
GO:BP	tube development	GO:0035295	FALSE	0.00355098	2.44965	1091	137	22	21031	ITGB8,FGF10,PTPRB,EMCN,CALCRL,SEMA5A,RHOJ,ADGRB3,GJB2,VEGFC,THBS2,ITGAX,ADAMTS9,EDNRA,SEMA3C,PTGIS,SFRP1,NOTCH3,COL4A1,SHANK3,MCAM,COL15A1
GO:BP	neuron remodeling	GO:0016322	TRUE	0.00358847	2.44509	15	137	4	21031	ADGRB3,EDNRA,NTN4,C1QA
GO:BP	import into cell	GO:0098657	TRUE	0.00370237	2.43152	923	137	20	21031	MS4A1,CD163,CALCRL,MCTP1,SLC8A1,RHOJ,SLC11A1,MARCO,MSR1,ABCC9,OLR1,ENPP1,MERTK,LYN,RAB31,SFRP4,MRC1,SLC7A2,LRP1B,TLR2
GO:BP	response to oxygen-containing compound	GO:1901700	FALSE	0.00430414	2.36611	1663	137	28	21031	FGF10,CALCRL,SLC8A1,COL5A2,SLC11A1,GJB2,ME1,AQP9,POSTN,EDNRA,ABCC9,PDE3A,ENPP1,IGF1,EFNA5,COL6A1,SFRP1,LYN,COL4A1,PRKCQ,RAB31,CD86,MZB1,BMP6,MRC1,FOLR2,MAP1B,TLR2
GO:BP	developmental cell growth	GO:0048588	FALSE	0.00497495	2.30321	233	137	10	21031	SEMA3A,SEMA5A,POSTN,EDNRA,SEMA3C,IGF1,EFNA5,PI16,MAP1B,COL14A1
GO:BP	cell-cell adhesion	GO:0098609	FALSE	0.00536891	2.27011	946	137	20	21031	EMCN,CCL5,SKAP1,TNXB,MAGI1,NEGR1,ITGAX,CTLA4,PCDH17,OLR1,IGF1,EFNA5,LYN,PRKCQ,CD86,ITGA9,IL7R,BMP6,MMRN1,COL14A1
GO:BP	regulation of signaling	GO:0023051	FALSE	0.00605874	2.21762	3437	137	44	21031	SEMA3A,PREX2,ITGB8,VWF,FGF10,RBM47,BANK1,SEMA5A,RAPGEF4,CCL5,MCTP1,PCSK6,LMCD1,BLK,TNXB,FLT3,VEGFC,MARCO,MYRIP,GPC6,POSTN,PTGIS,PCDH17,PDE3A,ENPP1,IGF1,RGS5,CNKSR3,EFNA5,SFRP1,LYN,PRKCQ,NUAK1,SFRP4,CD86,IL7R,MZB1,BMP6,SHANK3,EYA2,MAP1B,GPAT3,ASPN,TLR2
GO:BP	cell population proliferation	GO:0008283	FALSE	0.00670543	2.17357	2006	137	31	21031	FGF10,MS4A1,CD79A,BCL11B,CALCRL,SEMA5A,CCL5,ABI3BP,TNXB,SLC11A1,FLT3,VEGFC,ITGAX,CTLA4,EDNRA,ABCC9,PDE1A,IGF1,SFRP1,NOTCH3,LYN,PRKCQ,NUAK1,SFRP4,CD86,IL7R,MZB1,BMP6,SHANK3,FOLR2,TLR2
GO:BP	response to organonitrogen compound	GO:0010243	FALSE	0.00712055	2.14749	964	137	20	21031	SLC8A1,COL5A2,GJB2,FLT3,AQP9,EDNRA,ABCC9,PDE3A,ENPP1,IGF1,COL6A1,SFRP1,LYN,COL4A1,PRKCQ,RAB31,MZB1,FOLR2,MAP1B,TLR2
GO:BP	regulation of immune system process	GO:0002682	FALSE	0.00718371	2.14365	1512	137	26	21031	FGF10,FCER1A,MS4A1,CD79A,RBM47,BANK1,CCL5,BLK,SKAP1,CD1C,SLC11A1,VEGFC,CTLA4,PLVAP,IGF1,THEMIS,SFRP1,MERTK,LYN,PRKCQ,DNASE1L3,CD86,IL7R,MZB1,TLR2,C1QA
GO:BP	regulation of cellular process	GO:0050794	FALSE	0.00741706	2.12977	11738	137	102	21031	SEMA3A,PREX2,ITGB8,VWF,FGF10,ADGRL4,EMCN,FCER1A,MS4A1,CD79A,RBM47,BCL11B,BANK1,CALCRL,SEMA5A,ADGRL2,RAPGEF4,CCL5,MCTP1,SLC8A1,PCSK6,LMCD1,ZNF385B,ITGBL1,BLK,SKAP1,RHOJ,ABI3BP,ADGRB3,TNXB,COL5A2,CD1C,SLC11A1,PKIB,FLT3,VEGFC,ME1,MARCO,MSR1,MAGI1,THBS2,PARM1,MYRIP,GPC6,SMOC1,NEGR1,ITGAX,CTLA4,POSTN,TANC1,ADAMTS9,EDNRA,SEMA3C,ADCY4,FBLN2,PTGIS,PLVAP,PCDH17,PDE3A,ENPP1,PDE1A,RALGPS2,IGF1,RGS5,CNKSR3,E…
GO:BP	cellular response to chemical stimulus	GO:0070887	FALSE	0.00902465	2.04457	2683	137	37	21031	RBM47,CALCRL,SEMA5A,CCL5,SLC8A1,COL5A2,SLC11A1,GJB2,FLT3,VEGFC,MSR1,AQP9,SLCO2B1,POSTN,EDNRA,PTGIS,PLVAP,PDE3A,ENPP1,IGF1,EFNA5,COL6A1,SFRP1,LYN,COL4A1,PRKCQ,RAB31,CD86,ITGA9,IL7R,MZB1,BMP6,MRC1,ACKR1,FOLR2,MAP1B,TLR2
GO:BP	animal organ development	GO:0048513	FALSE	0.0103459	1.98523	3039	137	40	21031	SEMA3A,ITGB8,FGF10,BCL11B,CALCRL,SEMA5A,SLC8A1,MFAP5,RTN1,RHOJ,ABI3BP,TNXB,COL5A2,GJB2,FLT3,VEGFC,SMOC1,ITGAX,ADAMTS9,EDNRA,SEMA3C,ABCC9,ADAMTS5,ENPP1,IGF1,SFRP1,NOTCH3,MERTK,STOX2,COL4A1,NTN4,PI16,SFRP4,IL7R,BMP6,OLFM3,SHANK3,LDB2,ASPN,COL14A1
GO:BP	neurogenesis	GO:0022008	FALSE	0.0104476	1.98099	1742	137	28	21031	SEMA3A,PREX2,FGF10,PTPRB,BCL11B,SEMA5A,RTN1,ADGRB3,TNXB,VEGFC,CRTAC1,ADAMTSL1,NEGR1,POSTN,EDNRA,SEMA3C,EFNA5,SFRP1,NOTCH3,LYN,PRKCQ,NTN4,BMP6,OLFM3,SHANK3,MAP1B,TLR2,C1QA
GO:BP	neuron development	GO:0048666	FALSE	0.010476	1.9798	1167	137	22	21031	SEMA3A,PREX2,BCL11B,SEMA5A,ADGRB3,TNXB,CRTAC1,ADAMTSL1,NEGR1,POSTN,EDNRA,SEMA3C,EFNA5,SFRP1,NOTCH3,LYN,PRKCQ,NTN4,OLFM3,SHANK3,MAP1B,C1QA
GO:BP	B cell receptor signaling pathway	GO:0050853	TRUE	0.0111705	1.95193	71	137	6	21031	MS4A1,CD79A,BANK1,BLK,CTLA4,LYN
GO:BP	positive regulation of response to stimulus	GO:0048584	FALSE	0.011709	1.93148	2274	137	33	21031	SEMA3A,VWF,FGF10,MS4A1,CD79A,RBM47,BANK1,SEMA5A,CCL5,LMCD1,BLK,SKAP1,TNXB,CD1C,SLC11A1,FLT3,VEGFC,MARCO,CTLA4,PTGIS,IGF1,THEMIS,SFRP1,LYN,PRKCQ,SFRP4,CD86,IL7R,BMP6,SHANK3,EYA2,TLR2,C1QA
GO:BP	peptidyl-tyrosine phosphorylation	GO:0018108	TRUE	0.0122486	1.91191	258	137	10	21031	FGF10,BANK1,CCL5,BLK,FLT3,IGF1,EFNA5,SFRP1,LYN,BMP6
GO:BP	peptidyl-tyrosine modification	GO:0018212	FALSE	0.0131052	1.88255	260	137	10	21031	FGF10,BANK1,CCL5,BLK,FLT3,IGF1,EFNA5,SFRP1,LYN,BMP6
GO:BP	regulation of protein secretion	GO:0050708	TRUE	0.0154771	1.81031	265	137	10	21031	RAPGEF4,CCL5,BLK,VEGFC,MYRIP,IGF1,EFNA5,SFRP1,BMP6,TLR2
GO:BP	immune response-regulating cell surface receptor signaling pathway	GO:0002768	FALSE	0.0162525	1.78908	327	137	11	21031	FCER1A,MS4A1,CD79A,BANK1,BLK,SKAP1,CTLA4,THEMIS,LYN,PRKCQ,TLR2
GO:BP	nervous system development	GO:0007399	FALSE	0.0165795	1.78043	2531	137	35	21031	SEMA3A,PREX2,FGF10,PTPRB,BCL11B,SEMA5A,RTN1,ADGRB3,TNXB,VEGFC,SNTG2,CRTAC1,ADAMTSL1,THBS2,NEGR1,ITGAX,POSTN,EDNRA,SEMA3C,PCDH17,EFNA5,SFRP1,NOTCH3,MERTK,LYN,COL4A1,PRKCQ,NTN4,BMP6,OLFM3,SHANK3,MAP1B,LDB2,TLR2,C1QA
GO:BP	positive regulation of peptidyl-tyrosine phosphorylation	GO:0050731	FALSE	0.0189464	1.72247	163	137	8	21031	FGF10,BANK1,CCL5,FLT3,IGF1,EFNA5,LYN,BMP6
GO:BP	positive regulation of cell differentiation	GO:0045597	FALSE	0.0212329	1.67299	864	137	18	21031	SEMA5A,ABI3BP,TNXB,VEGFC,MSR1,ADAMTS9,PDE3A,IGF1,EFNA5,SFRP1,LYN,SFRP4,CD86,IL7R,BMP6,SHANK3,MAP1B,TLR2
GO:BP	cell motility	GO:0048870	FALSE	0.0215862	1.66582	1709	137	27	21031	SEMA3A,FGF10,PTPRB,BCL11B,SEMA5A,CCL5,MCTP1,RHOJ,TNXB,VEGFC,GPC6,ITGAX,POSTN,ADAMTS9,EDNRA,SEMA3C,PLVAP,IGF1,SFRP1,MERTK,LYN,PRKCQ,NTN4,ITGA9,MCAM,MAP1B,LDB2
GO:BP	generation of neurons	GO:0048699	FALSE	0.0227346	1.64331	1514	137	25	21031	SEMA3A,PREX2,BCL11B,SEMA5A,RTN1,ADGRB3,TNXB,VEGFC,CRTAC1,ADAMTSL1,NEGR1,POSTN,EDNRA,SEMA3C,EFNA5,SFRP1,NOTCH3,LYN,PRKCQ,NTN4,BMP6,OLFM3,SHANK3,MAP1B,C1QA
GO:BP	regulation of peptidyl-tyrosine phosphorylation	GO:0050730	FALSE	0.023116	1.63609	220	137	9	21031	FGF10,BANK1,CCL5,FLT3,IGF1,EFNA5,SFRP1,LYN,BMP6
GO:BP	endocytosis	GO:0006897	FALSE	0.023216	1.63421	704	137	16	21031	CD163,CALCRL,MCTP1,RHOJ,SLC11A1,MARCO,MSR1,OLR1,ENPP1,MERTK,LYN,RAB31,SFRP4,MRC1,LRP1B,TLR2
GO:BP	locomotion	GO:0040011	TRUE	0.0250971	1.60038	1234	137	22	21031	SEMA3A,FGF10,SEMA5A,CCL5,MCTP1,RHOJ,TNXB,VEGFC,ITGAX,POSTN,ADAMTS9,SEMA3C,PLVAP,IGF1,EFNA5,SFRP1,LYN,PRKCQ,ITGA9,SHANK3,MCAM,LDB2
GO:BP	cell adhesion mediated by integrin	GO:0033627	FALSE	0.025757	1.58911	82	137	6	21031	CCL5,SKAP1,ITGAX,LYN,ITGA9,MMRN1
GO:BP	neuron differentiation	GO:0030182	FALSE	0.0269251	1.56984	1431	137	24	21031	SEMA3A,PREX2,BCL11B,SEMA5A,RTN1,ADGRB3,TNXB,CRTAC1,ADAMTSL1,NEGR1,POSTN,EDNRA,SEMA3C,EFNA5,SFRP1,NOTCH3,LYN,PRKCQ,NTN4,BMP6,OLFM3,SHANK3,MAP1B,C1QA
GO:BP	sensory system development	GO:0048880	FALSE	0.0269464	1.5695	412	137	12	21031	SEMA3A,FGF10,BCL11B,MFAP5,RHOJ,COL5A2,SMOC1,MERTK,COL4A1,BMP6,OLFM3,C1QA
GO:BP	enzyme-linked receptor protein signaling pathway	GO:0007167	FALSE	0.0271503	1.56623	967	137	19	21031	ITGB8,FGF10,PCSK6,BLK,TNXB,FLT3,VEGFC,ENPP1,IGF1,EFNA5,SFRP1,MERTK,LYN,COL4A1,PRKCQ,SFRP4,MZB1,BMP6,ASPN
GO:BP	regulation of immune response	GO:0050776	FALSE	0.0275572	1.55976	881	137	18	21031	FCER1A,MS4A1,CD79A,RBM47,BANK1,CCL5,BLK,SKAP1,CD1C,SLC11A1,CTLA4,THEMIS,LYN,PRKCQ,CD86,IL7R,TLR2,C1QA
GO:BP	mononuclear cell differentiation	GO:1903131	TRUE	0.0278881	1.55458	484	137	13	21031	ITGB8,MS4A1,CD79A,BCL11B,FLT3,CTLA4,THEMIS,SFRP1,MERTK,LYN,POU2AF1,CD86,IL7R
GO:BP	response to nitrogen compound	GO:1901698	FALSE	0.0286202	1.54333	1060	137	20	21031	SLC8A1,COL5A2,GJB2,FLT3,AQP9,EDNRA,ABCC9,PDE3A,ENPP1,IGF1,COL6A1,SFRP1,LYN,COL4A1,PRKCQ,RAB31,MZB1,FOLR2,MAP1B,TLR2
GO:BP	positive regulation of multicellular organismal process	GO:0051240	FALSE	0.0293363	1.53259	1637	137	26	21031	ITGB8,FGF10,RBM47,SEMA5A,CCL5,SLC8A1,ABI3BP,ADGRB3,TNXB,SLC11A1,VEGFC,THBS2,ITGAX,POSTN,PTGIS,IGF1,EFNA5,LYN,POU2AF1,PRKCQ,CD86,IL7R,BMP6,SHANK3,MAP1B,TLR2
GO:BP	positive regulation of immune response	GO:0050778	FALSE	0.0295502	1.52944	718	137	16	21031	MS4A1,CD79A,RBM47,BANK1,CCL5,BLK,SKAP1,CD1C,SLC11A1,CTLA4,THEMIS,LYN,PRKCQ,CD86,TLR2,C1QA
GO:BP	negative regulation of T cell apoptotic process	GO:0070233	TRUE	0.0316151	1.5001	25	137	4	21031	BCL11B,CCL5,PRKCQ,IL7R
GO:BP	regulation of angiogenesis	GO:0045765	FALSE	0.0317906	1.4977	288	137	10	21031	ITGB8,SEMA5A,RHOJ,ADGRB3,VEGFC,THBS2,ITGAX,ADAMTS9,PTGIS,SFRP1
GO:BP	export from cell	GO:0140352	TRUE	0.0334813	1.4752	894	137	18	21031	FGF10,FCER1A,RAPGEF4,CCL5,MCTP1,SLC8A1,PCSK6,BLK,VEGFC,MYRIP,IGF1,EFNA5,SFRP1,MERTK,LYN,RAB31,BMP6,TLR2
GO:BP	regulation of vasculature development	GO:1901342	FALSE	0.0368388	1.43369	293	137	10	21031	ITGB8,SEMA5A,RHOJ,ADGRB3,VEGFC,THBS2,ITGAX,ADAMTS9,PTGIS,SFRP1
GO:BP	cell growth	GO:0016049	FALSE	0.0383635	1.41608	499	137	13	21031	SEMA3A,SEMA5A,POSTN,EDNRA,SEMA3C,ENPP1,IGF1,EFNA5,SFRP1,PRKCQ,PI16,MAP1B,COL14A1
GO:BP	cell-matrix adhesion	GO:0007160	FALSE	0.0389694	1.40928	235	137	9	21031	ITGB8,SKAP1,TNXB,ITGAX,POSTN,ADAMTS9,EFNA5,SFRP1,ITGA9
GO:BP	regulation of leukocyte apoptotic process	GO:2000106	TRUE	0.0411813	1.3853	89	137	6	21031	BCL11B,CCL5,MERTK,LYN,PRKCQ,IL7R
GO:BP	response to chemical	GO:0042221	FALSE	0.0445141	1.3515	3957	137	46	21031	SEMA3A,FGF10,RBM47,CALCRL,SEMA5A,CCL5,SLC8A1,COL5A2,SLC11A1,GJB2,FLT3,VEGFC,ME1,MSR1,AQP9,SLCO2B1,POSTN,EDNRA,SEMA3C,PTGIS,ABCC9,PLVAP,PDE3A,ENPP1,IGF1,EFNA5,COL6A1,SFRP1,LYN,COL4A1,PRKCQ,RAB31,SFRP4,CD86,ITGA9,IL7R,AFF3,MZB1,BMP6,MRC1,SHANK3,ACKR1,FOLR2,MAP1B,ASPN,TLR2
GO:BP	secretion by cell	GO:0032940	FALSE	0.0445965	1.3507	827	137	17	21031	FGF10,FCER1A,RAPGEF4,CCL5,MCTP1,PCSK6,BLK,VEGFC,MYRIP,IGF1,EFNA5,SFRP1,MERTK,LYN,RAB31,BMP6,TLR2
GO:BP	negative regulation of leukocyte apoptotic process	GO:2000107	FALSE	0.0470872	1.3271	55	137	5	21031	BCL11B,CCL5,MERTK,PRKCQ,IL7R

## Sheet: SD7
Supplementary Data 7. plasma private gene enrichment
source	term_name	term_id	highlighted	adjusted_p_value	negative_log10_of_adjusted_p_value	term_size	query_size	intersection_size	effective_domain_size	intersections
GO:BP	chromosome segregation	GO:0007059	TRUE	0.000245351	3.61021	425	100	13	21031	DIAPH3,MKI67,ASPM,TOP2A,KNL1,TEX14,CENPF,BRIP1,CENPM,NDC80,KIF14,STIL,NUF2
GO:BP	regulation of mitotic cell cycle phase transition	GO:1901990	FALSE	0.00113361	2.94553	332	100	11	21031	CDC14A,KNL1,TEX14,CENPF,CLSPN,CRADD,BCL2,NDC80,KIF14,STIL,NUF2
GO:BP	regulation of mitotic cell cycle	GO:0007346	FALSE	0.00142461	2.8463	496	100	13	21031	CDC14A,MKI67,KNL1,TEX14,CENPF,EIF4E,CLSPN,CRADD,BCL2,NDC80,KIF14,STIL,NUF2
GO:BP	mitotic cell cycle phase transition	GO:0044772	FALSE	0.00216464	2.66461	432	100	12	21031	CDC14A,KNL1,TEX14,CENPF,EIF4E,CLSPN,CRADD,BCL2,NDC80,KIF14,STIL,NUF2
GO:BP	regulation of cell cycle phase transition	GO:1901987	FALSE	0.00221767	2.6541	433	100	12	21031	CDC14A,KNL1,TEX14,CENPF,BRIP1,CLSPN,CRADD,BCL2,NDC80,KIF14,STIL,NUF2
GO:BP	B cell receptor signaling pathway	GO:0050853	TRUE	0.00240865	2.61823	71	100	6	21031	IGLC3,IGHA1,IGHM,VAV3,IGHG1,BCL2
GO:BP	cell cycle phase transition	GO:0044770	FALSE	0.00345206	2.46192	537	100	13	21031	CDC14A,KNL1,TEX14,CENPF,BRIP1,EIF4E,CLSPN,CRADD,BCL2,NDC80,KIF14,STIL,NUF2
GO:BP	immune response-activating cell surface receptor signaling pathway	GO:0002429	FALSE	0.00353535	2.45157	299	100	10	21031	IGLC3,IGHA1,PELI1,IGHM,PDE4D,VAV3,IGHG1,GBP1,BCL2,NR4A3
GO:BP	cell cycle process	GO:0022402	FALSE	0.00434483	2.36203	1276	100	20	21031	BIN3,DIAPH3,CDC14A,MKI67,ASPM,TOP2A,KNL1,TEX14,CENPF,STMN1,BRIP1,EIF4E,CLSPN,CENPM,CRADD,BCL2,NDC80,KIF14,STIL,NUF2
GO:BP	negative regulation of mitotic cell cycle phase transition	GO:1901991	FALSE	0.00531293	2.27467	181	100	8	21031	KNL1,TEX14,CENPF,CLSPN,CRADD,BCL2,NDC80,NUF2
GO:BP	spindle assembly checkpoint signaling	GO:0071173	FALSE	0.00560965	2.25106	46	100	5	21031	KNL1,TEX14,CENPF,NDC80,NUF2
GO:BP	mitotic spindle checkpoint signaling	GO:0071174	FALSE	0.00560965	2.25106	46	100	5	21031	KNL1,TEX14,CENPF,NDC80,NUF2
GO:BP	mitotic spindle assembly checkpoint signaling	GO:0007094	FALSE	0.00560965	2.25106	46	100	5	21031	KNL1,TEX14,CENPF,NDC80,NUF2
GO:BP	spindle checkpoint signaling	GO:0031577	FALSE	0.00625389	2.20385	47	100	5	21031	KNL1,TEX14,CENPF,NDC80,NUF2
GO:BP	negative regulation of mitotic sister chromatid separation	GO:2000816	FALSE	0.00695488	2.15771	48	100	5	21031	KNL1,TEX14,CENPF,NDC80,NUF2
GO:BP	negative regulation of mitotic metaphase/anaphase transition	GO:0045841	FALSE	0.00695488	2.15771	48	100	5	21031	KNL1,TEX14,CENPF,NDC80,NUF2
GO:BP	negative regulation of mitotic sister chromatid segregation	GO:0033048	FALSE	0.00695488	2.15771	48	100	5	21031	KNL1,TEX14,CENPF,NDC80,NUF2
GO:BP	negative regulation of sister chromatid segregation	GO:0033046	FALSE	0.00695488	2.15771	48	100	5	21031	KNL1,TEX14,CENPF,NDC80,NUF2
GO:BP	cell cycle	GO:0007049	FALSE	0.00715813	2.1452	1819	100	24	21031	BIN3,DIAPH3,CDC14A,MKI67,ASPM,TOP2A,KNL1,TEX14,CENPF,STMN1,BRIP1,EIF4E,CLSPN,CENPM,CRADD,BCL2,UHRF1,MCMDC2,OVOL2,NDC80,BIRC3,KIF14,STIL,NUF2
GO:BP	immune response-regulating cell surface receptor signaling pathway	GO:0002768	FALSE	0.00785926	2.10462	327	100	10	21031	IGLC3,IGHA1,PELI1,IGHM,PDE4D,VAV3,IGHG1,GBP1,BCL2,NR4A3
GO:BP	antigen receptor-mediated signaling pathway	GO:0050851	FALSE	0.00792301	2.10111	191	100	8	21031	IGLC3,IGHA1,IGHM,PDE4D,VAV3,IGHG1,GBP1,BCL2
GO:BP	negative regulation of chromosome separation	GO:1905819	FALSE	0.0085413	2.06848	50	100	5	21031	KNL1,TEX14,CENPF,NDC80,NUF2
GO:BP	negative regulation of metaphase/anaphase transition of cell cycle	GO:1902100	FALSE	0.0085413	2.06848	50	100	5	21031	KNL1,TEX14,CENPF,NDC80,NUF2
GO:BP	negative regulation of chromosome segregation	GO:0051985	FALSE	0.0085413	2.06848	50	100	5	21031	KNL1,TEX14,CENPF,NDC80,NUF2
GO:BP	organelle fission	GO:0048285	FALSE	0.0088438	2.05336	495	100	12	21031	CDC14A,MKI67,ASPM,TOP2A,KNL1,TEX14,CENPF,BRIP1,MAPT,NDC80,KIF14,NUF2
GO:BP	negative regulation of cell cycle phase transition	GO:1901988	FALSE	0.00911782	2.04011	260	100	9	21031	KNL1,TEX14,CENPF,BRIP1,CLSPN,CRADD,BCL2,NDC80,NUF2
GO:BP	cell cycle checkpoint signaling	GO:0000075	FALSE	0.00995877	2.00179	197	100	8	21031	KNL1,TEX14,CENPF,BRIP1,CLSPN,CRADD,NDC80,NUF2
GO:BP	regulation of response to stimulus	GO:0048583	TRUE	0.0107276	1.9695	3939	100	38	21031	IGLC3,TANK,IGHA1,PELI1,MLLT3,TFRC,ASPM,HOMER1,IGHM,PDE4D,SESN3,KNL1,VAV3,RBPJ,IGHG1,STMN1,KLB,GBP1,RALGAPA2,DUSP16,CRADD,BCL2,MAPT,FABP4,GCH1,PDE3B,NR4A3,OVOL2,HIST1H2BJ,NDC80,TMEM131L,ISG15,BIRC3,DEPDC1B,KIF14,ARHGAP11B,HELB,TIMP1
GO:BP	regulation of mitotic sister chromatid segregation	GO:0033047	FALSE	0.0125586	1.90106	54	100	5	21031	KNL1,TEX14,CENPF,NDC80,NUF2
GO:BP	negative regulation of chromosome organization	GO:2001251	FALSE	0.0133338	1.87505	95	100	6	21031	TOP2A,KNL1,TEX14,CENPF,NDC80,NUF2
GO:BP	mitotic cell cycle checkpoint signaling	GO:0007093	FALSE	0.0136547	1.86472	146	100	7	21031	KNL1,TEX14,CENPF,CLSPN,CRADD,NDC80,NUF2
GO:BP	negative regulation of mitotic nuclear division	GO:0045839	FALSE	0.0150552	1.82231	56	100	5	21031	KNL1,TEX14,CENPF,NDC80,NUF2
GO:BP	negative regulation of organelle organization	GO:0010639	FALSE	0.0187496	1.72701	361	100	10	21031	DIAPH3,TFRC,TOP2A,KNL1,TEX14,CENPF,STMN1,MAPT,NDC80,NUF2
GO:BP	regulation of mitotic sister chromatid separation	GO:0010965	FALSE	0.0195107	1.70973	59	100	5	21031	KNL1,TEX14,CENPF,NDC80,NUF2
GO:BP	nuclear division	GO:0000280	FALSE	0.0199069	1.701	447	100	11	21031	CDC14A,MKI67,ASPM,TOP2A,KNL1,TEX14,CENPF,BRIP1,NDC80,KIF14,NUF2
GO:BP	metaphase chromosome alignment	GO:0051310	FALSE	0.0201129	1.69653	102	100	6	21031	KNL1,TEX14,CENPF,NDC80,KIF14,NUF2
GO:BP	mitotic cell cycle process	GO:1903047	FALSE	0.0248423	1.60481	745	100	14	21031	CDC14A,MKI67,KNL1,TEX14,CENPF,STMN1,EIF4E,CLSPN,CRADD,BCL2,NDC80,KIF14,STIL,NUF2
GO:BP	mitotic sister chromatid separation	GO:0051306	FALSE	0.0249358	1.60318	62	100	5	21031	KNL1,TEX14,CENPF,NDC80,NUF2
GO:BP	intracellular signal transduction	GO:0035556	FALSE	0.0250113	1.60186	2668	100	29	21031	TANK,PELI1,TFRC,PLCL1,PDE4D,SESN3,KNL1,TEX14,VAV3,CENPF,STMN1,BRIP1,CLSPN,KLB,GBP1,RALGAPA2,DUSP16,CRADD,BCL2,MAPT,PDE3B,NR4A3,OVOL2,NDC80,BIRC3,DEPDC1B,KIF14,ARHGAP11B,NUF2
GO:BP	negative regulation of nuclear division	GO:0051784	FALSE	0.0269839	1.5689	63	100	5	21031	KNL1,TEX14,CENPF,NDC80,NUF2
GO:BP	immune response-activating signaling pathway	GO:0002757	FALSE	0.028783	1.54086	465	100	11	21031	IGLC3,IGHA1,PELI1,IGHM,PDE4D,VAV3,IGHG1,GBP1,BCL2,NR4A3,BIRC3
GO:BP	cell division	GO:0051301	TRUE	0.0300808	1.52171	656	100	13	21031	BIN3,MLLT3,CDC14A,ASPM,TOP2A,KNL1,TEX14,CENPF,STMN1,BRIP1,NDC80,KIF14,NUF2
GO:BP	negative regulation of cell cycle process	GO:0010948	FALSE	0.0303765	1.51746	302	100	9	21031	KNL1,TEX14,CENPF,BRIP1,CLSPN,CRADD,BCL2,NDC80,NUF2
GO:BP	negative regulation of mitotic cell cycle	GO:0045930	FALSE	0.0328699	1.4832	232	100	8	21031	KNL1,TEX14,CENPF,CLSPN,CRADD,BCL2,NDC80,NUF2
GO:BP	cellular response to stimulus	GO:0051716	TRUE	0.0344692	1.46257	7394	100	56	21031	IGLC3,TANK,IGHA1,PELI1,MLLT3,DIAPH3,TFRC,PLCL1,ASPM,HOMER1,TOP2A,IGHM,PDE4D,SESN3,KNL1,TEX14,VAV3,NIBAN1,CENPF,RBPJ,IGHG1,STMN1,BRIP1,EIF4E,CLSPN,KLB,ITGA2B,GBP1,RALGAPA2,DUSP16,MT1X,CRADD,HERPUD2,BCL2,MAPT,FABP4,UHRF1,GCH1,PDE3B,MCMDC2,NR4A3,OVOL2,RNASEH2A,HIST1H2BJ,NDC80,TMEM131L,ISG15,CCDC62,BIRC3,DEPDC1B,KIF14,ARHGAP11B,HELB,TIMP1,STIL,NUF2
GO:BP	regulation of cell cycle	GO:0051726	FALSE	0.0364002	1.4389	1105	100	17	21031	CDC14A,MKI67,ASPM,KNL1,TEX14,CENPF,BRIP1,EIF4E,CLSPN,CRADD,BCL2,OVOL2,NDC80,BIRC3,KIF14,STIL,NUF2
GO:BP	establishment of chromosome localization	GO:0051303	FALSE	0.0420104	1.37664	116	100	6	21031	KNL1,TEX14,CENPF,NDC80,KIF14,NUF2
GO:BP	nuclear chromosome segregation	GO:0098813	FALSE	0.0456937	1.34014	318	100	9	21031	ASPM,TOP2A,KNL1,TEX14,CENPF,BRIP1,NDC80,KIF14,NUF2
GO:BP	regulation of mitotic nuclear division	GO:0007088	FALSE	0.0462982	1.33444	118	100	6	21031	MKI67,KNL1,TEX14,CENPF,NDC80,NUF2
GO:BP	immune response-regulating signaling pathway	GO:0002764	FALSE	0.0485034	1.31423	492	100	11	21031	IGLC3,IGHA1,PELI1,IGHM,PDE4D,VAV3,IGHG1,GBP1,BCL2,NR4A3,BIRC3

## Sheet: SD8
Supplementary Data 8. plasma shared gene enrichment
source	term_name	term_id	highlighted	adjusted_p_value	negative_log10_of_adjusted_p_value	term_size	query_size	intersection_size	effective_domain_size	intersections
GO:BP	multicellular organismal process	GO:0032501	TRUE	4.56144e-14	13.3409	7669	136	98	21031	SEMA3A,PREX2,VWF,ITGB8,PTPRB,CD79A,MS4A1,FGF10,EMCN,CLIC5,FCER1A,F13A1,BANK1,CALCRL,SEMA5A,CCL5,RBM47,BCL11B,SLC8A1,MFAP5,PCSK6,LMCD1,ABI3BP,TNXB,COL5A2,ADGRB3,SEMA3C,RTN1,RHOJ,MARCO,CD1C,FLT3,CRTAC1,MSR1,SNTG2,GJB2,SLC11A1,NEGR1,THBS2,EDNRA,WDFY4,AQP9,VEGFC,ADAMTSL1,ABCC9,SMOC1,POU2AF1,ADAMTS5,ADAMTS9,SLCO2B1,FCRL1,PTGIS,PCDH17,IGF1,TANC1,ITGAX,POSTN,NOTCH3,SFRP1,OLR1,PLVAP,CTLA4,MZB1,PDE3A,PI16…
GO:BP	response to stimulus	GO:0050896	FALSE	1.05681e-10	9.976	8976	136	101	21031	SEMA3A,PREX2,VWF,ITGB8,CD79A,MS4A1,FGF10,ADGRL4,CLIC5,FCER1A,F13A1,BANK1,CALCRL,CD163,RAPGEF4,ADGRL2,SEMA5A,CCL5,RBM47,SLC8A1,MCTP1,PCSK6,LMCD1,ITGBL1,ABI3BP,TNXB,ZNF385B,COL5A2,ADGRB3,ME1,SEMA3C,SKAP1,RHOJ,BLK,MARCO,CD1C,FLT3,MSR1,GJB2,SLC11A1,EDNRA,WDFY4,AQP9,VEGFC,ABCC9,MAGI1,POU2AF1,ADAMTS5,ADAMTS9,SLCO2B1,GPC6,ADCY4,PTGIS,RGS5,IGF1,TANC1,RALGPS2,ITGAX,POSTN,CNKSR3,NOTCH3,SFRP1,OLR1,PLVAP,CTL…
GO:BP	cell adhesion	GO:0007155	TRUE	1.36721e-09	8.86416	1512	136	37	21031	VWF,ITGB8,EMCN,SEMA5A,CCL5,ITGBL1,ABI3BP,TNXB,SKAP1,NEGR1,THBS2,ADAMTSL1,MAGI1,ADAMTS9,PGM5,PCDH17,IGF1,ITGAX,POSTN,SFRP1,OLR1,FBLN2,CTLA4,EFNA5,CD86,NTN4,COL6A1,LYN,BMP6,MERTK,CNTNAP3B,PRKCQ,MCAM,NUAK1,FOLR2,TGFBI,COL14A1
GO:BP	cell surface receptor signaling pathway	GO:0007166	FALSE	1.65017e-09	8.78247	2799	136	51	21031	SEMA3A,ITGB8,CD79A,MS4A1,FGF10,ADGRL4,FCER1A,BANK1,CALCRL,ADGRL2,SEMA5A,CCL5,RBM47,PCSK6,ITGBL1,TNXB,ADGRB3,SEMA3C,SKAP1,BLK,MARCO,FLT3,EDNRA,VEGFC,MAGI1,IGF1,ITGAX,POSTN,NOTCH3,SFRP1,PLVAP,CTLA4,MZB1,ASPN,EFNA5,SFRP4,CD86,ENPP1,FCRL5,THEMIS,LYN,EYA2,BMP6,MERTK,PRKCQ,COL4A1,TIE1,CHRDL1,SHANK3,BICC1,FLT1
GO:BP	anatomical structure development	GO:0048856	FALSE	1.32137e-08	7.87898	5899	136	76	21031	SEMA3A,PREX2,ITGB8,PTPRB,CD79A,MS4A1,FGF10,EMCN,CALCRL,SEMA5A,RBM47,BCL11B,SLC8A1,MFAP5,PCSK6,ABI3BP,TNXB,COL5A2,ADGRB3,SEMA3C,RTN1,RHOJ,FLT3,CRTAC1,SNTG2,GJB2,NEGR1,THBS2,EDNRA,VEGFC,ADAMTSL1,ABCC9,SMOC1,POU2AF1,ADAMTS5,ADAMTS9,PGM5,PTGIS,PCDH17,IGF1,TANC1,ITGAX,POSTN,NOTCH3,SFRP1,CTLA4,PDE3A,PI16,ASPN,EFNA5,SFRP4,CD86,NTN4,COL6A1,STOX2,ENPP1,THEMIS,LYN,DNASE1L3,AFF3,EYA2,BMP6,MERTK,PRKCQ,OLFM3,…
GO:BP	developmental process	GO:0032502	FALSE	1.54377e-08	7.81142	6453	136	80	21031	SEMA3A,PREX2,ITGB8,PTPRB,CD79A,MS4A1,FGF10,EMCN,CALCRL,SEMA5A,RBM47,BCL11B,SLC8A1,MFAP5,PCSK6,ABI3BP,TNXB,COL5A2,ADGRB3,SEMA3C,RTN1,RHOJ,BLK,FLT3,CRTAC1,MSR1,SNTG2,GJB2,NEGR1,THBS2,EDNRA,VEGFC,ADAMTSL1,ABCC9,SMOC1,POU2AF1,ADAMTS5,ADAMTS9,PGM5,PTGIS,PCDH17,IGF1,TANC1,ITGAX,POSTN,NOTCH3,SFRP1,PLVAP,CTLA4,PDE3A,PI16,ASPN,EFNA5,SFRP4,CD86,NTN4,COL6A1,STOX2,ENPP1,THEMIS,LYN,DNASE1L3,AFF3,EYA2,BMP6,MER…
GO:BP	cell differentiation	GO:0030154	FALSE	3.22026e-08	7.49211	4366	136	63	21031	SEMA3A,PREX2,ITGB8,PTPRB,CD79A,MS4A1,FGF10,SEMA5A,RBM47,BCL11B,SLC8A1,MFAP5,ABI3BP,TNXB,COL5A2,ADGRB3,SEMA3C,RTN1,BLK,FLT3,CRTAC1,MSR1,NEGR1,EDNRA,VEGFC,ADAMTSL1,SMOC1,POU2AF1,ADAMTS5,ADAMTS9,PGM5,IGF1,TANC1,POSTN,NOTCH3,SFRP1,CTLA4,PDE3A,PI16,EFNA5,SFRP4,CD86,NTN4,COL6A1,ENPP1,THEMIS,LYN,DNASE1L3,EYA2,BMP6,MERTK,PRKCQ,RAI14,OLFM3,COL4A1,C1QA,TIE1,TGFBI,CHRDL1,SHANK3,KAZN,COL14A1,FLT1
GO:BP	cellular developmental process	GO:0048869	FALSE	3.25347e-08	7.48765	4367	136	63	21031	SEMA3A,PREX2,ITGB8,PTPRB,CD79A,MS4A1,FGF10,SEMA5A,RBM47,BCL11B,SLC8A1,MFAP5,ABI3BP,TNXB,COL5A2,ADGRB3,SEMA3C,RTN1,BLK,FLT3,CRTAC1,MSR1,NEGR1,EDNRA,VEGFC,ADAMTSL1,SMOC1,POU2AF1,ADAMTS5,ADAMTS9,PGM5,IGF1,TANC1,POSTN,NOTCH3,SFRP1,CTLA4,PDE3A,PI16,EFNA5,SFRP4,CD86,NTN4,COL6A1,ENPP1,THEMIS,LYN,DNASE1L3,EYA2,BMP6,MERTK,PRKCQ,RAI14,OLFM3,COL4A1,C1QA,TIE1,TGFBI,CHRDL1,SHANK3,KAZN,COL14A1,FLT1
GO:BP	circulatory system development	GO:0072359	FALSE	4.38928e-08	7.35761	1130	136	30	21031	ITGB8,PTPRB,FGF10,EMCN,CALCRL,SEMA5A,SLC8A1,ABI3BP,ADGRB3,SEMA3C,RHOJ,THBS2,EDNRA,VEGFC,ABCC9,ADAMTS5,ADAMTS9,PTGIS,IGF1,ITGAX,NOTCH3,SFRP1,PI16,COL4A1,TIE1,MCAM,TGFBI,BICC1,COL14A1,FLT1
GO:BP	multicellular organism development	GO:0007275	FALSE	4.6949e-08	7.32837	4643	136	65	21031	SEMA3A,PREX2,ITGB8,PTPRB,FGF10,EMCN,CALCRL,SEMA5A,BCL11B,SLC8A1,MFAP5,PCSK6,ABI3BP,TNXB,COL5A2,ADGRB3,SEMA3C,RTN1,RHOJ,CRTAC1,SNTG2,GJB2,NEGR1,THBS2,EDNRA,VEGFC,ADAMTSL1,ABCC9,SMOC1,ADAMTS5,ADAMTS9,PTGIS,PCDH17,IGF1,ITGAX,POSTN,NOTCH3,SFRP1,CTLA4,PI16,ASPN,EFNA5,SFRP4,CD86,NTN4,COL6A1,STOX2,ENPP1,LYN,AFF3,EYA2,BMP6,MERTK,PRKCQ,OLFM3,COL4A1,C1QA,TIE1,MCAM,TGFBI,CHRDL1,SHANK3,BICC1,COL14A1,FLT1
GO:BP	angiogenesis	GO:0001525	FALSE	6.44099e-08	7.19105	538	136	21	21031	ITGB8,PTPRB,FGF10,EMCN,CALCRL,SEMA5A,ADGRB3,RHOJ,THBS2,EDNRA,VEGFC,ADAMTS9,PTGIS,ITGAX,NOTCH3,SFRP1,COL4A1,TIE1,MCAM,TGFBI,FLT1
GO:BP	blood vessel development	GO:0001568	FALSE	3.81479e-07	6.41853	721	136	23	21031	ITGB8,PTPRB,FGF10,EMCN,CALCRL,SEMA5A,ADGRB3,SEMA3C,RHOJ,THBS2,EDNRA,VEGFC,ABCC9,ADAMTS9,PTGIS,ITGAX,NOTCH3,SFRP1,COL4A1,TIE1,MCAM,TGFBI,FLT1
GO:BP	leukocyte activation	GO:0045321	FALSE	5.5379e-07	6.25665	946	136	26	21031	ITGB8,CD79A,MS4A1,FGF10,FCER1A,BANK1,CCL5,BCL11B,CD1C,FLT3,SLC11A1,WDFY4,POU2AF1,FCRL1,IGF1,SFRP1,CTLA4,MZB1,CD86,NKG7,THEMIS,LYN,DNASE1L3,MERTK,PRKCQ,C1QA
GO:BP	anatomical structure formation involved in morphogenesis	GO:0048646	FALSE	6.52822e-07	6.18521	1183	136	29	21031	ITGB8,PTPRB,FGF10,EMCN,CALCRL,SEMA5A,COL5A2,ADGRB3,SEMA3C,RHOJ,THBS2,EDNRA,VEGFC,ADAMTS5,ADAMTS9,PGM5,PTGIS,TANC1,ITGAX,NOTCH3,SFRP1,COL6A1,EYA2,COL4A1,TIE1,MCAM,TGFBI,SHANK3,FLT1
GO:BP	vasculature development	GO:0001944	FALSE	8.65021e-07	6.06297	752	136	23	21031	ITGB8,PTPRB,FGF10,EMCN,CALCRL,SEMA5A,ADGRB3,SEMA3C,RHOJ,THBS2,EDNRA,VEGFC,ABCC9,ADAMTS9,PTGIS,ITGAX,NOTCH3,SFRP1,COL4A1,TIE1,MCAM,TGFBI,FLT1
GO:BP	cell communication	GO:0007154	FALSE	9.37791e-07	6.02789	6537	136	77	21031	SEMA3A,PREX2,VWF,ITGB8,CD79A,MS4A1,FGF10,ADGRL4,FCER1A,BANK1,CALCRL,RAPGEF4,ADGRL2,SEMA5A,CCL5,RBM47,SLC8A1,MCTP1,PCSK6,LMCD1,ITGBL1,TNXB,ZNF385B,ADGRB3,SEMA3C,SKAP1,RHOJ,BLK,MARCO,FLT3,GJB2,EDNRA,MYRIP,VEGFC,MAGI1,GPC6,ADCY4,PTGIS,RGS5,PCDH17,IGF1,RALGPS2,ITGAX,POSTN,CNKSR3,NOTCH3,SFRP1,PLVAP,CTLA4,MZB1,PDE3A,PDE1A,ASPN,EFNA5,SFRP4,CD86,NTN4,NKG7,ENPP1,FCRL5,THEMIS,LYN,EYA2,BMP6,MERTK,PRKCQ,OLFM…
GO:BP	blood vessel morphogenesis	GO:0048514	FALSE	9.96623e-07	6.00147	625	136	21	21031	ITGB8,PTPRB,FGF10,EMCN,CALCRL,SEMA5A,ADGRB3,RHOJ,THBS2,EDNRA,VEGFC,ADAMTS9,PTGIS,ITGAX,NOTCH3,SFRP1,COL4A1,TIE1,MCAM,TGFBI,FLT1
GO:BP	signaling	GO:0023052	FALSE	1.35844e-06	5.86696	6447	136	76	21031	SEMA3A,PREX2,VWF,ITGB8,CD79A,MS4A1,FGF10,ADGRL4,FCER1A,BANK1,CALCRL,RAPGEF4,ADGRL2,SEMA5A,CCL5,RBM47,SLC8A1,MCTP1,PCSK6,LMCD1,ITGBL1,TNXB,ZNF385B,ADGRB3,SEMA3C,SKAP1,RHOJ,BLK,MARCO,FLT3,GJB2,EDNRA,MYRIP,VEGFC,MAGI1,GPC6,ADCY4,PTGIS,RGS5,PCDH17,IGF1,RALGPS2,ITGAX,POSTN,CNKSR3,NOTCH3,SFRP1,PLVAP,CTLA4,MZB1,PDE3A,PDE1A,ASPN,EFNA5,SFRP4,CD86,NTN4,NKG7,ENPP1,FCRL5,THEMIS,LYN,EYA2,BMP6,MERTK,PRKCQ,OLFM…
GO:BP	cell activation	GO:0001775	FALSE	2.43541e-06	5.61343	1092	136	27	21031	VWF,ITGB8,CD79A,MS4A1,FGF10,FCER1A,BANK1,CCL5,BCL11B,CD1C,FLT3,SLC11A1,WDFY4,POU2AF1,FCRL1,IGF1,SFRP1,CTLA4,MZB1,CD86,NKG7,THEMIS,LYN,DNASE1L3,MERTK,PRKCQ,C1QA
GO:BP	cellular response to stimulus	GO:0051716	FALSE	2.99775e-06	5.5232	7394	136	82	21031	SEMA3A,PREX2,VWF,ITGB8,CD79A,MS4A1,FGF10,ADGRL4,FCER1A,BANK1,CALCRL,RAPGEF4,ADGRL2,SEMA5A,CCL5,RBM47,SLC8A1,MCTP1,PCSK6,LMCD1,ITGBL1,TNXB,ZNF385B,COL5A2,ADGRB3,SEMA3C,SKAP1,RHOJ,BLK,MARCO,FLT3,MSR1,GJB2,SLC11A1,EDNRA,AQP9,VEGFC,MAGI1,SLCO2B1,GPC6,ADCY4,PTGIS,RGS5,IGF1,RALGPS2,ITGAX,POSTN,CNKSR3,NOTCH3,SFRP1,PLVAP,CTLA4,MZB1,PDE3A,PDE1A,ASPN,EFNA5,SFRP4,CD86,COL6A1,NKG7,ENPP1,PCOLCE2,FCRL5,THEMIS,…
GO:BP	anatomical structure morphogenesis	GO:0009653	FALSE	3.49731e-06	5.45627	2684	136	44	21031	SEMA3A,PREX2,ITGB8,PTPRB,FGF10,EMCN,CALCRL,SEMA5A,BCL11B,MFAP5,COL5A2,ADGRB3,SEMA3C,RHOJ,THBS2,EDNRA,VEGFC,ADAMTSL1,ABCC9,ADAMTS5,ADAMTS9,PGM5,PTGIS,TANC1,ITGAX,POSTN,NOTCH3,SFRP1,ASPN,EFNA5,SFRP4,NTN4,COL6A1,AFF3,EYA2,BMP6,PRKCQ,OLFM3,COL4A1,TIE1,MCAM,TGFBI,SHANK3,FLT1
GO:BP	signal transduction	GO:0007165	FALSE	5.87356e-06	5.2311	5959	136	71	21031	SEMA3A,PREX2,VWF,ITGB8,CD79A,MS4A1,FGF10,ADGRL4,FCER1A,BANK1,CALCRL,RAPGEF4,ADGRL2,SEMA5A,CCL5,RBM47,SLC8A1,MCTP1,PCSK6,LMCD1,ITGBL1,TNXB,ZNF385B,ADGRB3,SEMA3C,SKAP1,RHOJ,BLK,MARCO,FLT3,EDNRA,VEGFC,MAGI1,GPC6,ADCY4,PTGIS,RGS5,IGF1,RALGPS2,ITGAX,POSTN,CNKSR3,NOTCH3,SFRP1,PLVAP,CTLA4,MZB1,PDE3A,PDE1A,ASPN,EFNA5,SFRP4,CD86,NKG7,ENPP1,FCRL5,THEMIS,LYN,EYA2,BMP6,MERTK,PRKCQ,OLFM3,COL4A1,TIE1,NUAK1,CHR…
GO:BP	system development	GO:0048731	FALSE	7.08643e-06	5.14957	3973	136	55	21031	SEMA3A,PREX2,ITGB8,PTPRB,FGF10,EMCN,CALCRL,SEMA5A,BCL11B,SLC8A1,MFAP5,ABI3BP,TNXB,COL5A2,ADGRB3,SEMA3C,RTN1,RHOJ,CRTAC1,SNTG2,NEGR1,THBS2,EDNRA,VEGFC,ADAMTSL1,ABCC9,SMOC1,ADAMTS5,ADAMTS9,PTGIS,PCDH17,IGF1,ITGAX,POSTN,NOTCH3,SFRP1,PI16,EFNA5,SFRP4,NTN4,LYN,BMP6,MERTK,PRKCQ,OLFM3,COL4A1,C1QA,TIE1,MCAM,TGFBI,CHRDL1,SHANK3,BICC1,COL14A1,FLT1
GO:BP	lymphocyte activation	GO:0046649	FALSE	1.01706e-05	4.99265	783	136	22	21031	CD79A,MS4A1,FGF10,BANK1,CCL5,BCL11B,CD1C,FLT3,SLC11A1,WDFY4,POU2AF1,FCRL1,IGF1,SFRP1,CTLA4,MZB1,CD86,NKG7,THEMIS,LYN,MERTK,PRKCQ
GO:BP	cellular response to endogenous stimulus	GO:0071495	FALSE	1.22614e-05	4.91146	1432	136	30	21031	ITGB8,FGF10,CCL5,SLC8A1,PCSK6,TNXB,COL5A2,FLT3,GJB2,EDNRA,AQP9,VEGFC,IGF1,POSTN,SFRP1,MZB1,PDE3A,ASPN,EFNA5,SFRP4,COL6A1,ENPP1,LYN,RAB31,BMP6,PRKCQ,COL4A1,FOLR2,CHRDL1,FLT1
GO:BP	regulation of multicellular organismal process	GO:0051239	FALSE	2.15988e-05	4.66557	2955	136	45	21031	SEMA3A,ITGB8,FGF10,BANK1,SEMA5A,CCL5,RBM47,SLC8A1,LMCD1,ABI3BP,TNXB,ADGRB3,SEMA3C,RHOJ,SLC11A1,THBS2,EDNRA,VEGFC,ABCC9,POU2AF1,ADAMTS5,ADAMTS9,PTGIS,IGF1,ITGAX,POSTN,SFRP1,CTLA4,MZB1,PDE3A,PI16,ASPN,EFNA5,SFRP4,CD86,NTN4,ENPP1,LYN,BMP6,MERTK,PRKCQ,TIE1,SHANK3,COL14A1,FLT1
GO:BP	extracellular matrix organization	GO:0030198	TRUE	4.058e-05	4.39169	324	136	14	21031	COL22A1,ABI3BP,TNXB,COL5A2,ADAMTSL1,SMOC1,ADAMTS5,ADAMTS9,POSTN,NTN4,COL4A1,TIE1,TGFBI,COL14A1
GO:BP	extracellular structure organization	GO:0043062	FALSE	4.21758e-05	4.37494	325	136	14	21031	COL22A1,ABI3BP,TNXB,COL5A2,ADAMTSL1,SMOC1,ADAMTS5,ADAMTS9,POSTN,NTN4,COL4A1,TIE1,TGFBI,COL14A1
GO:BP	external encapsulating structure organization	GO:0045229	FALSE	4.38282e-05	4.35825	326	136	14	21031	COL22A1,ABI3BP,TNXB,COL5A2,ADAMTSL1,SMOC1,ADAMTS5,ADAMTS9,POSTN,NTN4,COL4A1,TIE1,TGFBI,COL14A1
GO:BP	tube morphogenesis	GO:0035239	FALSE	6.95929e-05	4.15743	872	136	22	21031	ITGB8,PTPRB,FGF10,EMCN,CALCRL,SEMA5A,ADGRB3,RHOJ,THBS2,EDNRA,VEGFC,ADAMTS9,PTGIS,ITGAX,NOTCH3,SFRP1,COL4A1,TIE1,MCAM,TGFBI,SHANK3,FLT1
GO:BP	response to endogenous stimulus	GO:0009719	FALSE	0.000119375	3.92309	1678	136	31	21031	ITGB8,FGF10,CCL5,SLC8A1,PCSK6,TNXB,COL5A2,ME1,FLT3,GJB2,EDNRA,AQP9,VEGFC,IGF1,POSTN,SFRP1,MZB1,PDE3A,ASPN,EFNA5,SFRP4,COL6A1,ENPP1,LYN,RAB31,BMP6,PRKCQ,COL4A1,FOLR2,CHRDL1,FLT1
GO:BP	regulation of response to stimulus	GO:0048583	FALSE	0.000124572	3.90458	3939	136	52	21031	SEMA3A,PREX2,VWF,CD79A,MS4A1,FGF10,FCER1A,BANK1,SEMA5A,CCL5,RBM47,MCTP1,PCSK6,LMCD1,TNXB,SEMA3C,SKAP1,BLK,MARCO,CD1C,FLT3,SLC11A1,VEGFC,GPC6,PTGIS,RGS5,IGF1,POSTN,CNKSR3,SFRP1,CTLA4,MZB1,PDE3A,PI16,ASPN,SFRP4,CD86,NKG7,ENPP1,THEMIS,LYN,DNASE1L3,EYA2,BMP6,PRKCQ,C1QA,NUAK1,CHRDL1,SHANK3,BICC1,GUCY1A2,FLT1
GO:BP	regulation of multicellular organismal development	GO:2000026	FALSE	0.000134774	3.87039	1411	136	28	21031	SEMA3A,ITGB8,FGF10,SEMA5A,SLC8A1,ADGRB3,SEMA3C,RHOJ,THBS2,VEGFC,ADAMTS9,PTGIS,IGF1,ITGAX,SFRP1,CTLA4,PI16,ASPN,EFNA5,SFRP4,CD86,ENPP1,LYN,BMP6,TIE1,SHANK3,COL14A1,FLT1
GO:BP	animal organ development	GO:0048513	FALSE	0.000151801	3.81873	3039	136	44	21031	SEMA3A,ITGB8,FGF10,CALCRL,SEMA5A,BCL11B,SLC8A1,MFAP5,ABI3BP,TNXB,COL5A2,SEMA3C,RTN1,RHOJ,FLT3,GJB2,EDNRA,VEGFC,ABCC9,SMOC1,ADAMTS5,ADAMTS9,IGF1,ITGAX,NOTCH3,SFRP1,PI16,ASPN,SFRP4,NTN4,STOX2,ENPP1,BMP6,MERTK,OLFM3,COL4A1,TIE1,TGFBI,CHRDL1,SHANK3,BICC1,KAZN,COL14A1,FLT1
GO:BP	tube development	GO:0035295	FALSE	0.000205289	3.68763	1091	136	24	21031	ITGB8,PTPRB,FGF10,EMCN,CALCRL,SEMA5A,ADGRB3,SEMA3C,RHOJ,GJB2,THBS2,EDNRA,VEGFC,ADAMTS9,PTGIS,ITGAX,NOTCH3,SFRP1,COL4A1,TIE1,MCAM,TGFBI,SHANK3,FLT1
GO:BP	enzyme-linked receptor protein signaling pathway	GO:0007167	FALSE	0.000417651	3.37919	967	136	22	21031	ITGB8,FGF10,PCSK6,TNXB,BLK,FLT3,VEGFC,IGF1,SFRP1,MZB1,ASPN,EFNA5,SFRP4,ENPP1,LYN,BMP6,MERTK,PRKCQ,COL4A1,TIE1,CHRDL1,FLT1
GO:BP	cell development	GO:0048468	FALSE	0.000445514	3.35114	2819	136	41	21031	SEMA3A,PREX2,ITGB8,CD79A,MS4A1,SEMA5A,RBM47,BCL11B,SLC8A1,MFAP5,TNXB,ADGRB3,SEMA3C,FLT3,CRTAC1,NEGR1,EDNRA,VEGFC,ADAMTSL1,POU2AF1,PGM5,IGF1,POSTN,NOTCH3,SFRP1,CTLA4,PDE3A,PI16,EFNA5,CD86,NTN4,THEMIS,LYN,DNASE1L3,BMP6,MERTK,PRKCQ,OLFM3,C1QA,SHANK3,COL14A1
GO:BP	regulation of angiogenesis	GO:0045765	FALSE	0.000625623	3.20369	288	136	12	21031	ITGB8,SEMA5A,ADGRB3,RHOJ,THBS2,VEGFC,ADAMTS9,PTGIS,ITGAX,SFRP1,TIE1,FLT1
GO:BP	tissue development	GO:0009888	FALSE	0.000647398	3.18883	2010	136	33	21031	SEMA3A,ITGB8,FGF10,SEMA5A,BCL11B,SLC8A1,TNXB,COL5A2,SEMA3C,GJB2,EDNRA,VEGFC,ADAMTS5,ADAMTS9,PGM5,IGF1,ITGAX,POSTN,SFRP1,PI16,ASPN,SFRP4,NTN4,COL6A1,ENPP1,EYA2,BMP6,COL4A1,TIE1,TGFBI,SHANK3,KAZN,COL14A1
GO:BP	regulation of vasculature development	GO:1901342	FALSE	0.000751409	3.12412	293	136	12	21031	ITGB8,SEMA5A,ADGRB3,RHOJ,THBS2,VEGFC,ADAMTS9,PTGIS,ITGAX,SFRP1,TIE1,FLT1
GO:BP	cell-substrate adhesion	GO:0031589	FALSE	0.000769619	3.11372	351	136	13	21031	VWF,ITGB8,ABI3BP,TNXB,SKAP1,ADAMTS9,ITGAX,POSTN,SFRP1,FBLN2,EFNA5,NTN4,MERTK
GO:BP	sensory system development	GO:0048880	FALSE	0.000771076	3.1129	412	136	14	21031	SEMA3A,FGF10,BCL11B,MFAP5,COL5A2,RHOJ,SMOC1,BMP6,MERTK,OLFM3,COL4A1,C1QA,CHRDL1,FLT1
GO:BP	regulation of developmental process	GO:0050793	FALSE	0.000884336	3.05338	2455	136	37	21031	SEMA3A,ITGB8,FGF10,SEMA5A,BCL11B,SLC8A1,ABI3BP,TNXB,COL5A2,ADGRB3,SEMA3C,RHOJ,MSR1,THBS2,VEGFC,SMOC1,ADAMTS9,PTGIS,IGF1,ITGAX,NOTCH3,SFRP1,CTLA4,PDE3A,PI16,ASPN,EFNA5,SFRP4,CD86,NTN4,ENPP1,LYN,BMP6,TIE1,SHANK3,COL14A1,FLT1
GO:BP	regulation of cell adhesion	GO:0030155	FALSE	0.00104785	2.9797	778	136	19	21031	EMCN,SEMA5A,CCL5,ABI3BP,TNXB,SKAP1,MAGI1,IGF1,POSTN,SFRP1,FBLN2,CTLA4,EFNA5,CD86,LYN,BMP6,PRKCQ,NUAK1,TGFBI
GO:BP	lymphocyte proliferation	GO:0046651	FALSE	0.00127443	2.89468	308	136	12	21031	CD79A,MS4A1,FGF10,CCL5,FLT3,SLC11A1,IGF1,CTLA4,MZB1,CD86,LYN,PRKCQ
GO:BP	peptidyl-tyrosine phosphorylation	GO:0018108	TRUE	0.00155643	2.80787	258	136	11	21031	FGF10,BANK1,CCL5,BLK,FLT3,IGF1,SFRP1,EFNA5,LYN,BMP6,FLT1
GO:BP	mononuclear cell proliferation	GO:0032943	FALSE	0.00161405	2.79208	315	136	12	21031	CD79A,MS4A1,FGF10,CCL5,FLT3,SLC11A1,IGF1,CTLA4,MZB1,CD86,LYN,PRKCQ
GO:BP	peptidyl-tyrosine modification	GO:0018212	FALSE	0.00167882	2.775	260	136	11	21031	FGF10,BANK1,CCL5,BLK,FLT3,IGF1,SFRP1,EFNA5,LYN,BMP6,FLT1
GO:BP	response to organic substance	GO:0010033	FALSE	0.00181219	2.7418	2637	136	38	21031	FGF10,CALCRL,CCL5,RBM47,SLC8A1,COL5A2,ME1,FLT3,MSR1,GJB2,SLC11A1,EDNRA,AQP9,VEGFC,ABCC9,PTGIS,IGF1,POSTN,SFRP1,PLVAP,MZB1,PDE3A,EFNA5,SFRP4,CD86,COL6A1,ENPP1,PCOLCE2,LYN,MRC1,RAB31,AFF3,BMP6,PRKCQ,COL4A1,TIE1,FOLR2,SHANK3
GO:BP	cell population proliferation	GO:0008283	FALSE	0.00191562	2.71769	2006	136	32	21031	CD79A,MS4A1,FGF10,CALCRL,SEMA5A,CCL5,BCL11B,ABI3BP,TNXB,FLT3,SLC11A1,EDNRA,VEGFC,ABCC9,IGF1,ITGAX,NOTCH3,SFRP1,CTLA4,MZB1,PDE1A,SFRP4,CD86,LYN,BMP6,PRKCQ,TIE1,NUAK1,FOLR2,TGFBI,SHANK3,FLT1
GO:BP	regulation of cell communication	GO:0010646	FALSE	0.00199017	2.70111	3443	136	45	21031	SEMA3A,PREX2,VWF,ITGB8,FGF10,BANK1,RAPGEF4,SEMA5A,CCL5,RBM47,SLC8A1,MCTP1,PCSK6,LMCD1,TNXB,BLK,MARCO,FLT3,MYRIP,VEGFC,GPC6,PTGIS,RGS5,PCDH17,IGF1,POSTN,CNKSR3,SFRP1,MZB1,PDE3A,ASPN,EFNA5,SFRP4,CD86,ENPP1,LYN,EYA2,BMP6,PRKCQ,NUAK1,CHRDL1,SHANK3,BICC1,GUCY1A2,FLT1
GO:BP	positive regulation of biological process	GO:0048518	FALSE	0.00200499	2.69789	6250	136	67	21031	SEMA3A,VWF,ITGB8,CD79A,MS4A1,FGF10,BANK1,CALCRL,RAPGEF4,SEMA5A,CCL5,RBM47,BCL11B,SLC8A1,LMCD1,ABI3BP,TNXB,ADGRB3,SEMA3C,SKAP1,PKIB,RHOJ,BLK,MARCO,PARM1,CD1C,FLT3,MSR1,SLC11A1,NEGR1,THBS2,EDNRA,MYRIP,VEGFC,MAGI1,POU2AF1,ADAMTS9,PTGIS,IGF1,ITGAX,POSTN,CNKSR3,NOTCH3,SFRP1,PLVAP,FBLN2,CTLA4,MZB1,PDE3A,EFNA5,SFRP4,CD86,NKG7,THEMIS,LYN,RAB31,EYA2,BMP6,MERTK,PRKCQ,C1QA,TIE1,MCAM,FOLR2,SHANK3,GUCY1A2,FLT1
GO:BP	immune system process	GO:0002376	FALSE	0.00235616	2.62779	2776	136	39	21031	ITGB8,CD79A,MS4A1,FGF10,FCER1A,BANK1,RAPGEF4,CCL5,RBM47,BCL11B,SEMA3C,SKAP1,BLK,MARCO,CD1C,FLT3,SLC11A1,WDFY4,VEGFC,POU2AF1,FCRL1,IGF1,SFRP1,OLR1,PLVAP,CTLA4,MZB1,CD86,NKG7,ENPP1,THEMIS,LYN,MRC1,DNASE1L3,BMP6,MERTK,PRKCQ,C1QA,FLT1
GO:BP	cellular response to organonitrogen compound	GO:0071417	FALSE	0.00347433	2.45913	610	136	16	21031	SLC8A1,COL5A2,GJB2,EDNRA,AQP9,IGF1,SFRP1,MZB1,PDE3A,COL6A1,ENPP1,LYN,RAB31,PRKCQ,COL4A1,FOLR2
GO:BP	neuron remodeling	GO:0016322	TRUE	0.00348516	2.45778	15	136	4	21031	ADGRB3,EDNRA,NTN4,C1QA
GO:BP	positive regulation of response to stimulus	GO:0048584	FALSE	0.00353158	2.45203	2274	136	34	21031	SEMA3A,VWF,CD79A,MS4A1,FGF10,BANK1,SEMA5A,CCL5,RBM47,LMCD1,TNXB,SKAP1,BLK,MARCO,CD1C,FLT3,SLC11A1,VEGFC,PTGIS,IGF1,SFRP1,CTLA4,SFRP4,CD86,NKG7,THEMIS,LYN,EYA2,BMP6,PRKCQ,C1QA,SHANK3,GUCY1A2,FLT1
GO:BP	B cell activation	GO:0042113	FALSE	0.0035748	2.44675	281	136	11	21031	CD79A,MS4A1,BANK1,FLT3,POU2AF1,FCRL1,SFRP1,CTLA4,MZB1,CD86,LYN
GO:BP	visual system development	GO:0150063	FALSE	0.00389732	2.40923	406	136	13	21031	FGF10,BCL11B,MFAP5,COL5A2,RHOJ,SMOC1,BMP6,MERTK,OLFM3,COL4A1,C1QA,CHRDL1,FLT1
GO:BP	regulation of signaling	GO:0023051	FALSE	0.00487694	2.31185	3437	136	44	21031	SEMA3A,PREX2,VWF,ITGB8,FGF10,BANK1,RAPGEF4,SEMA5A,CCL5,RBM47,MCTP1,PCSK6,LMCD1,TNXB,BLK,MARCO,FLT3,MYRIP,VEGFC,GPC6,PTGIS,RGS5,PCDH17,IGF1,POSTN,CNKSR3,SFRP1,MZB1,PDE3A,ASPN,EFNA5,SFRP4,CD86,ENPP1,LYN,EYA2,BMP6,PRKCQ,NUAK1,CHRDL1,SHANK3,BICC1,GUCY1A2,FLT1
GO:BP	regulation of biological process	GO:0050789	FALSE	0.00491703	2.3083	12287	136	105	21031	SEMA3A,PREX2,VWF,ITGB8,CD79A,MS4A1,FGF10,ADGRL4,EMCN,FCER1A,BANK1,CALCRL,RAPGEF4,ADGRL2,SEMA5A,CCL5,RBM47,BCL11B,SLC8A1,MCTP1,PCSK6,LMCD1,ITGBL1,ABI3BP,TNXB,ZNF385B,COL5A2,ADGRB3,ME1,SEMA3C,RTN1,SKAP1,PKIB,RHOJ,BLK,MARCO,PARM1,CD1C,FLT3,MSR1,GJB2,SLC11A1,NEGR1,THBS2,EDNRA,MYRIP,VEGFC,ABCC9,SMOC1,MAGI1,POU2AF1,ADAMTS5,ADAMTS9,GPC6,ADCY4,PTGIS,RGS5,PCDH17,IGF1,TANC1,RALGPS2,ITGAX,POSTN,CNKSR3,NOTCH…
GO:BP	leukocyte proliferation	GO:0070661	FALSE	0.00496443	2.30413	351	136	12	21031	CD79A,MS4A1,FGF10,CCL5,FLT3,SLC11A1,IGF1,CTLA4,MZB1,CD86,LYN,PRKCQ
GO:BP	cell migration	GO:0016477	FALSE	0.00514324	2.28876	1496	136	26	21031	SEMA3A,PTPRB,FGF10,SEMA5A,CCL5,BCL11B,MCTP1,TNXB,SEMA3C,RHOJ,EDNRA,VEGFC,ADAMTS9,GPC6,IGF1,ITGAX,POSTN,SFRP1,PLVAP,NTN4,LYN,MERTK,PRKCQ,TIE1,MCAM,FLT1
GO:BP	biological regulation	GO:0065007	FALSE	0.0060685	2.21692	12680	136	107	21031	SEMA3A,PREX2,VWF,ITGB8,CD79A,MS4A1,FGF10,ADGRL4,EMCN,FCER1A,F13A1,BANK1,CALCRL,RAPGEF4,ADGRL2,SEMA5A,CCL5,RBM47,BCL11B,SLC8A1,MCTP1,PCSK6,LMCD1,ITGBL1,ABI3BP,TNXB,ZNF385B,COL5A2,ADGRB3,ME1,SEMA3C,RTN1,SKAP1,PKIB,RHOJ,BLK,MARCO,PARM1,CD1C,FLT3,MSR1,GJB2,SLC11A1,NEGR1,THBS2,EDNRA,MYRIP,VEGFC,ABCC9,SMOC1,MAGI1,POU2AF1,ADAMTS5,ADAMTS9,GPC6,ADCY4,PTGIS,RGS5,PCDH17,IGF1,TANC1,RALGPS2,ITGAX,POSTN,DMXL2,…
GO:BP	positive regulation of developmental process	GO:0051094	FALSE	0.00676816	2.16953	1328	136	24	21031	ITGB8,FGF10,SEMA5A,SLC8A1,ABI3BP,TNXB,ADGRB3,MSR1,THBS2,VEGFC,ADAMTS9,PTGIS,IGF1,ITGAX,SFRP1,PDE3A,EFNA5,SFRP4,CD86,LYN,BMP6,TIE1,SHANK3,FLT1
GO:BP	response to external stimulus	GO:0009605	FALSE	0.0105829	1.9754	2723	136	37	21031	SEMA3A,ITGB8,MS4A1,FGF10,BANK1,SEMA5A,CCL5,RBM47,SLC8A1,SEMA3C,BLK,MARCO,GJB2,SLC11A1,WDFY4,VEGFC,ABCC9,POU2AF1,ADAMTS5,ADAMTS9,PTGIS,IGF1,ITGAX,POSTN,SFRP1,EFNA5,CD86,NKG7,LYN,MRC1,DNASE1L3,BMP6,PRKCQ,C1QA,NUAK1,FOLR2,FLT1
GO:BP	B cell receptor signaling pathway	GO:0050853	TRUE	0.0107096	1.97023	71	136	6	21031	CD79A,MS4A1,BANK1,BLK,CTLA4,LYN
GO:BP	cellular response to oxygen-containing compound	GO:1901701	TRUE	0.0109056	1.96235	1179	136	22	21031	CALCRL,SLC8A1,COL5A2,GJB2,EDNRA,AQP9,IGF1,POSTN,SFRP1,MZB1,PDE3A,EFNA5,CD86,COL6A1,ENPP1,LYN,MRC1,RAB31,BMP6,PRKCQ,COL4A1,FOLR2
GO:BP	response to oxygen-containing compound	GO:1901700	FALSE	0.0114168	1.94246	1663	136	27	21031	FGF10,CALCRL,SLC8A1,COL5A2,ME1,GJB2,SLC11A1,EDNRA,AQP9,ABCC9,IGF1,POSTN,SFRP1,MZB1,PDE3A,EFNA5,CD86,COL6A1,ENPP1,LYN,MRC1,RAB31,BMP6,PRKCQ,COL4A1,TIE1,FOLR2
GO:BP	regulation of biological quality	GO:0065008	FALSE	0.011469	1.94048	2846	136	38	21031	SEMA3A,VWF,FGF10,F13A1,RAPGEF4,SEMA5A,CCL5,RBM47,SLC8A1,MCTP1,PCSK6,ADGRB3,SEMA3C,RHOJ,BLK,SLC11A1,NEGR1,THBS2,EDNRA,MYRIP,VEGFC,ABCC9,GPC6,IGF1,TANC1,POSTN,DMXL2,SFRP1,PLVAP,PDE3A,EFNA5,LYN,EYA2,BMP6,MERTK,PRKCQ,CHRDL1,SHANK3
GO:BP	cellular response to organic substance	GO:0071310	FALSE	0.011529	1.93821	1971	136	30	21031	CALCRL,CCL5,RBM47,SLC8A1,COL5A2,FLT3,MSR1,GJB2,EDNRA,AQP9,VEGFC,PTGIS,IGF1,POSTN,SFRP1,PLVAP,MZB1,PDE3A,EFNA5,CD86,COL6A1,ENPP1,PCOLCE2,LYN,MRC1,RAB31,BMP6,PRKCQ,COL4A1,FOLR2
GO:BP	cellular response to nitrogen compound	GO:1901699	FALSE	0.0118694	1.92557	672	136	16	21031	SLC8A1,COL5A2,GJB2,EDNRA,AQP9,IGF1,SFRP1,MZB1,PDE3A,COL6A1,ENPP1,LYN,RAB31,PRKCQ,COL4A1,FOLR2
GO:BP	regulation of anatomical structure morphogenesis	GO:0022603	FALSE	0.0126709	1.89719	838	136	18	21031	SEMA3A,ITGB8,FGF10,SEMA5A,ADGRB3,SEMA3C,RHOJ,THBS2,VEGFC,ADAMTS9,PTGIS,ITGAX,SFRP1,EFNA5,NTN4,TIE1,SHANK3,FLT1
GO:BP	regulation of cell migration	GO:0030334	FALSE	0.0150135	1.82352	934	136	19	21031	SEMA3A,FGF10,SEMA5A,CCL5,MCTP1,TNXB,SEMA3C,RHOJ,VEGFC,ADAMTS9,IGF1,ITGAX,POSTN,SFRP1,PLVAP,LYN,TIE1,MCAM,FLT1
GO:BP	positive regulation of cell migration	GO:0030335	FALSE	0.017826	1.74895	540	136	14	21031	SEMA3A,FGF10,SEMA5A,CCL5,SEMA3C,RHOJ,VEGFC,IGF1,ITGAX,POSTN,PLVAP,LYN,MCAM,FLT1
GO:BP	transmembrane receptor protein tyrosine kinase signaling pathway	GO:0007169	FALSE	0.0179213	1.74663	616	136	15	21031	FGF10,TNXB,BLK,FLT3,VEGFC,IGF1,MZB1,EFNA5,ENPP1,LYN,MERTK,PRKCQ,COL4A1,TIE1,FLT1
GO:BP	positive regulation of peptidyl-tyrosine phosphorylation	GO:0050731	FALSE	0.017957	1.74577	163	136	8	21031	FGF10,BANK1,CCL5,FLT3,IGF1,EFNA5,LYN,BMP6
GO:BP	eye development	GO:0001654	FALSE	0.0196001	1.70774	402	136	12	21031	FGF10,BCL11B,MFAP5,COL5A2,RHOJ,SMOC1,BMP6,MERTK,OLFM3,COL4A1,CHRDL1,FLT1
GO:BP	regulation of peptidyl-tyrosine phosphorylation	GO:0050730	FALSE	0.0217928	1.66169	220	136	9	21031	FGF10,BANK1,CCL5,FLT3,IGF1,SFRP1,EFNA5,LYN,BMP6
GO:BP	locomotion	GO:0040011	FALSE	0.022282	1.65205	1234	136	22	21031	SEMA3A,FGF10,SEMA5A,CCL5,MCTP1,TNXB,SEMA3C,RHOJ,VEGFC,ADAMTS9,IGF1,ITGAX,POSTN,SFRP1,PLVAP,EFNA5,LYN,PRKCQ,TIE1,MCAM,SHANK3,FLT1
GO:BP	positive regulation of immune system process	GO:0002684	FALSE	0.0236191	1.62674	1054	136	20	21031	CD79A,MS4A1,FGF10,BANK1,CCL5,RBM47,SKAP1,BLK,CD1C,SLC11A1,VEGFC,IGF1,PLVAP,CTLA4,MZB1,CD86,THEMIS,LYN,PRKCQ,C1QA
GO:BP	positive regulation of cellular process	GO:0048522	FALSE	0.0250356	1.60144	5717	136	60	21031	SEMA3A,VWF,ITGB8,MS4A1,FGF10,BANK1,CALCRL,RAPGEF4,SEMA5A,CCL5,RBM47,BCL11B,LMCD1,ABI3BP,TNXB,ADGRB3,SEMA3C,SKAP1,PKIB,RHOJ,BLK,MARCO,PARM1,CD1C,FLT3,MSR1,SLC11A1,NEGR1,THBS2,EDNRA,MYRIP,VEGFC,MAGI1,POU2AF1,ADAMTS9,PTGIS,IGF1,ITGAX,POSTN,NOTCH3,SFRP1,PLVAP,FBLN2,CTLA4,MZB1,PDE3A,EFNA5,SFRP4,CD86,LYN,RAB31,EYA2,BMP6,MERTK,PRKCQ,MCAM,FOLR2,SHANK3,GUCY1A2,FLT1
GO:BP	protein phosphorylation	GO:0006468	FALSE	0.0273199	1.56352	1346	136	23	21031	FGF10,BANK1,CCL5,SLC8A1,PKIB,BLK,MARCO,FLT3,SLC11A1,VEGFC,IGF1,CNKSR3,SFRP1,EFNA5,CD86,ENPP1,LYN,BMP6,MERTK,PRKCQ,TIE1,NUAK1,FLT1
GO:BP	export from cell	GO:0140352	TRUE	0.0302632	1.51909	894	136	18	21031	FGF10,FCER1A,RAPGEF4,CCL5,SLC8A1,MCTP1,PCSK6,BLK,MYRIP,VEGFC,IGF1,SFRP1,EFNA5,NKG7,LYN,RAB31,BMP6,MERTK
GO:BP	neuron development	GO:0048666	FALSE	0.0312241	1.50551	1167	136	21	21031	SEMA3A,PREX2,SEMA5A,BCL11B,TNXB,ADGRB3,SEMA3C,CRTAC1,NEGR1,EDNRA,ADAMTSL1,POSTN,NOTCH3,SFRP1,EFNA5,NTN4,LYN,PRKCQ,OLFM3,C1QA,SHANK3
GO:BP	positive regulation of cell motility	GO:2000147	FALSE	0.0312966	1.5045	568	136	14	21031	SEMA3A,FGF10,SEMA5A,CCL5,SEMA3C,RHOJ,VEGFC,IGF1,ITGAX,POSTN,PLVAP,LYN,MCAM,FLT1
GO:BP	developmental cell growth	GO:0048588	FALSE	0.0343655	1.46388	233	136	9	21031	SEMA3A,SEMA5A,SEMA3C,EDNRA,IGF1,POSTN,PI16,EFNA5,COL14A1
GO:BP	regulation of cell motility	GO:2000145	FALSE	0.036747	1.43478	996	136	19	21031	SEMA3A,FGF10,SEMA5A,CCL5,MCTP1,TNXB,SEMA3C,RHOJ,VEGFC,ADAMTS9,IGF1,ITGAX,POSTN,SFRP1,PLVAP,LYN,TIE1,MCAM,FLT1
GO:BP	regulation of protein phosphorylation	GO:0001932	FALSE	0.0382818	1.41701	910	136	18	21031	FGF10,BANK1,CCL5,SLC8A1,PKIB,MARCO,FLT3,SLC11A1,VEGFC,IGF1,CNKSR3,SFRP1,EFNA5,CD86,ENPP1,LYN,BMP6,FLT1
GO:BP	regulation of cell differentiation	GO:0045595	FALSE	0.0392539	1.40612	1576	136	25	21031	SEMA3A,FGF10,SEMA5A,BCL11B,ABI3BP,TNXB,COL5A2,SEMA3C,MSR1,VEGFC,SMOC1,ADAMTS9,IGF1,NOTCH3,SFRP1,CTLA4,PDE3A,PI16,EFNA5,SFRP4,CD86,ENPP1,LYN,BMP6,SHANK3
GO:BP	secretion by cell	GO:0032940	FALSE	0.0405194	1.39234	827	136	17	21031	FGF10,FCER1A,RAPGEF4,CCL5,MCTP1,PCSK6,BLK,MYRIP,VEGFC,IGF1,SFRP1,EFNA5,NKG7,LYN,RAB31,BMP6,MERTK
GO:BP	positive regulation of locomotion	GO:0040017	FALSE	0.0416986	1.37988	583	136	14	21031	SEMA3A,FGF10,SEMA5A,CCL5,SEMA3C,RHOJ,VEGFC,IGF1,ITGAX,POSTN,PLVAP,LYN,MCAM,FLT1
GO:BP	import into cell	GO:0098657	TRUE	0.0461428	1.3359	923	136	18	21031	MS4A1,CALCRL,CD163,SLC8A1,MCTP1,RHOJ,MARCO,MSR1,SLC11A1,ABCC9,OLR1,SFRP4,ENPP1,LYN,MRC1,RAB31,MERTK,SLC7A2
GO:BP	negative regulation of developmental process	GO:0051093	FALSE	0.0495309	1.30512	928	136	18	21031	SEMA3A,FGF10,SEMA5A,COL5A2,ADGRB3,SEMA3C,THBS2,VEGFC,ADAMTS9,IGF1,NOTCH3,SFRP1,CTLA4,PI16,ASPN,ENPP1,LYN,TIE1

## Sheet: SD9
Supplementary Data 9. Tcell private gene enrichment
source	term_name	term_id	highlighted	adjusted_p_value	negative_log10_of_adjusted_p_value	term_size	query_size	intersection_size	effective_domain_size	intersections
GO:BP	chromosome segregation	GO:0007059	TRUE	3.02785e-05	4.51887	425	100	14	21031	DIAPH3,MKI67,TOP2A,ASPM,TEX14,KNL1,CENPF,BRIP1,CENPM,NDC80,STIL,KIF18A,NUF2,KIF14
GO:BP	cell cycle process	GO:0022402	FALSE	0.00103813	2.98375	1276	100	21	21031	BIN3,DIAPH3,MKI67,TOP2A,CDC14A,ASPM,TEX14,KNL1,CENPF,CLSPN,BRIP1,STMN1,CENPM,EIF4E,CRADD,BCL2,NDC80,STIL,KIF18A,NUF2,KIF14
GO:BP	regulation of mitotic cell cycle phase transition	GO:1901990	FALSE	0.00113361	2.94553	332	100	11	21031	CDC14A,TEX14,KNL1,CENPF,CLSPN,CRADD,BCL2,NDC80,STIL,NUF2,KIF14
GO:BP	metaphase chromosome alignment	GO:0051310	FALSE	0.001233	2.90904	102	100	7	21031	TEX14,KNL1,CENPF,NDC80,KIF18A,NUF2,KIF14
GO:BP	organelle fission	GO:0048285	FALSE	0.00139268	2.85615	495	100	13	21031	MKI67,TOP2A,CDC14A,ASPM,TEX14,KNL1,CENPF,BRIP1,MAPT,NDC80,KIF18A,NUF2,KIF14
GO:BP	regulation of mitotic cell cycle	GO:0007346	FALSE	0.00142461	2.8463	496	100	13	21031	MKI67,CDC14A,TEX14,KNL1,CENPF,CLSPN,EIF4E,CRADD,BCL2,NDC80,STIL,NUF2,KIF14
GO:BP	cell cycle	GO:0007049	FALSE	0.00200214	2.6985	1819	100	25	21031	BIN3,DIAPH3,MKI67,TOP2A,CDC14A,ASPM,TEX14,KNL1,CENPF,CLSPN,BRIP1,STMN1,CENPM,EIF4E,CRADD,BCL2,UHRF1,OVOL2,NDC80,STIL,KIF18A,NUF2,BIRC3,MCMDC2,KIF14
GO:BP	mitotic cell cycle phase transition	GO:0044772	FALSE	0.00216464	2.66461	432	100	12	21031	CDC14A,TEX14,KNL1,CENPF,CLSPN,EIF4E,CRADD,BCL2,NDC80,STIL,NUF2,KIF14
GO:BP	regulation of cell cycle phase transition	GO:1901987	FALSE	0.00221767	2.6541	433	100	12	21031	CDC14A,TEX14,KNL1,CENPF,CLSPN,BRIP1,CRADD,BCL2,NDC80,STIL,NUF2,KIF14
GO:BP	B cell receptor signaling pathway	GO:0050853	TRUE	0.00240865	2.61823	71	100	6	21031	IGLC3,IGHA1,VAV3,IGHM,IGHG1,BCL2
GO:BP	establishment of chromosome localization	GO:0051303	FALSE	0.00294907	2.53032	116	100	7	21031	TEX14,KNL1,CENPF,NDC80,KIF18A,NUF2,KIF14
GO:BP	nuclear division	GO:0000280	FALSE	0.00309115	2.50988	447	100	12	21031	MKI67,TOP2A,CDC14A,ASPM,TEX14,KNL1,CENPF,BRIP1,NDC80,KIF18A,NUF2,KIF14
GO:BP	cell cycle phase transition	GO:0044770	FALSE	0.00345206	2.46192	537	100	13	21031	CDC14A,TEX14,KNL1,CENPF,CLSPN,BRIP1,EIF4E,CRADD,BCL2,NDC80,STIL,NUF2,KIF14
GO:BP	immune response-activating cell surface receptor signaling pathway	GO:0002429	FALSE	0.00353535	2.45157	299	100	10	21031	IGLC3,IGHA1,PELI1,VAV3,IGHM,PDE4D,IGHG1,BCL2,GBP1,NR4A3
GO:BP	chromosome localization	GO:0050000	FALSE	0.00461588	2.33575	124	100	7	21031	TEX14,KNL1,CENPF,NDC80,KIF18A,NUF2,KIF14
GO:BP	mitotic cell cycle process	GO:1903047	FALSE	0.00506009	2.29584	745	100	15	21031	MKI67,CDC14A,TEX14,KNL1,CENPF,CLSPN,STMN1,EIF4E,CRADD,BCL2,NDC80,STIL,KIF18A,NUF2,KIF14
GO:BP	negative regulation of mitotic cell cycle phase transition	GO:1901991	FALSE	0.00531293	2.27467	181	100	8	21031	TEX14,KNL1,CENPF,CLSPN,CRADD,BCL2,NDC80,NUF2
GO:BP	cellular response to stimulus	GO:0051716	TRUE	0.00546393	2.26249	7394	100	58	21031	IGLC3,TANK,IGHA1,MLLT3,DIAPH3,PELI1,TOP2A,PLCL1,TFRC,ASPM,HOMER1,VAV3,TEX14,KNL1,IGHM,SESN3,PDE4D,NIBAN1,CENPF,CLSPN,BRIP1,IGHG1,RBPJ,STMN1,DUSP16,RALGAPA2,HERPUD2,EIF4E,ITGA2B,KLB,CRADD,BCL2,GBP1,UHRF1,MT1X,RNASEH2A,FABP4,GCH1,PDE3B,OVOL2,CCDC62,MAPT,ISG15,NDC80,HELB,TMEM131L,STIL,KIF18A,ARHGAP11B,NR4A3,DEPDC1B,NUF2,BIRC3,MCMDC2,KIF14,CACNG7,HIST1H2BJ,GPR19
GO:BP	mitotic spindle checkpoint signaling	GO:0071174	FALSE	0.00560965	2.25106	46	100	5	21031	TEX14,KNL1,CENPF,NDC80,NUF2
GO:BP	spindle assembly checkpoint signaling	GO:0071173	FALSE	0.00560965	2.25106	46	100	5	21031	TEX14,KNL1,CENPF,NDC80,NUF2
GO:BP	mitotic spindle assembly checkpoint signaling	GO:0007094	FALSE	0.00560965	2.25106	46	100	5	21031	TEX14,KNL1,CENPF,NDC80,NUF2
GO:BP	nuclear chromosome segregation	GO:0098813	FALSE	0.00613377	2.21227	318	100	10	21031	TOP2A,ASPM,TEX14,KNL1,CENPF,BRIP1,NDC80,KIF18A,NUF2,KIF14
GO:BP	spindle checkpoint signaling	GO:0031577	FALSE	0.00625389	2.20385	47	100	5	21031	TEX14,KNL1,CENPF,NDC80,NUF2
GO:BP	negative regulation of sister chromatid segregation	GO:0033046	FALSE	0.00695488	2.15771	48	100	5	21031	TEX14,KNL1,CENPF,NDC80,NUF2
GO:BP	negative regulation of mitotic sister chromatid separation	GO:2000816	FALSE	0.00695488	2.15771	48	100	5	21031	TEX14,KNL1,CENPF,NDC80,NUF2
GO:BP	negative regulation of mitotic sister chromatid segregation	GO:0033048	FALSE	0.00695488	2.15771	48	100	5	21031	TEX14,KNL1,CENPF,NDC80,NUF2
GO:BP	negative regulation of mitotic metaphase/anaphase transition	GO:0045841	FALSE	0.00695488	2.15771	48	100	5	21031	TEX14,KNL1,CENPF,NDC80,NUF2
GO:BP	immune response-regulating cell surface receptor signaling pathway	GO:0002768	FALSE	0.00785926	2.10462	327	100	10	21031	IGLC3,IGHA1,PELI1,VAV3,IGHM,PDE4D,IGHG1,BCL2,GBP1,NR4A3
GO:BP	antigen receptor-mediated signaling pathway	GO:0050851	FALSE	0.00792301	2.10111	191	100	8	21031	IGLC3,IGHA1,VAV3,IGHM,PDE4D,IGHG1,BCL2,GBP1
GO:BP	negative regulation of chromosome separation	GO:1905819	FALSE	0.0085413	2.06848	50	100	5	21031	TEX14,KNL1,CENPF,NDC80,NUF2
GO:BP	negative regulation of chromosome segregation	GO:0051985	FALSE	0.0085413	2.06848	50	100	5	21031	TEX14,KNL1,CENPF,NDC80,NUF2
GO:BP	negative regulation of metaphase/anaphase transition of cell cycle	GO:1902100	FALSE	0.0085413	2.06848	50	100	5	21031	TEX14,KNL1,CENPF,NDC80,NUF2
GO:BP	negative regulation of cell cycle phase transition	GO:1901988	FALSE	0.00911782	2.04011	260	100	9	21031	TEX14,KNL1,CENPF,CLSPN,BRIP1,CRADD,BCL2,NDC80,NUF2
GO:BP	meiotic nuclear division	GO:0140013	FALSE	0.00995877	2.00179	197	100	8	21031	TOP2A,ASPM,TEX14,KNL1,BRIP1,NDC80,KIF18A,NUF2
GO:BP	cell cycle checkpoint signaling	GO:0000075	FALSE	0.00995877	2.00179	197	100	8	21031	TEX14,KNL1,CENPF,CLSPN,BRIP1,CRADD,NDC80,NUF2
GO:BP	regulation of response to stimulus	GO:0048583	TRUE	0.0107276	1.9695	3939	100	38	21031	IGLC3,TANK,IGHA1,MLLT3,PELI1,TFRC,ASPM,HOMER1,VAV3,KNL1,IGHM,SESN3,PDE4D,IGHG1,RBPJ,STMN1,DUSP16,RALGAPA2,KLB,CRADD,BCL2,GBP1,FABP4,GCH1,PDE3B,OVOL2,MAPT,ISG15,NDC80,HELB,TMEM131L,ARHGAP11B,NR4A3,DEPDC1B,BIRC3,KIF14,CACNG7,HIST1H2BJ
GO:BP	regulation of mitotic sister chromatid segregation	GO:0033047	FALSE	0.0125586	1.90106	54	100	5	21031	TEX14,KNL1,CENPF,NDC80,NUF2
GO:BP	negative regulation of chromosome organization	GO:2001251	FALSE	0.0133338	1.87505	95	100	6	21031	TOP2A,TEX14,KNL1,CENPF,NDC80,NUF2
GO:BP	mitotic cell cycle checkpoint signaling	GO:0007093	FALSE	0.0136547	1.86472	146	100	7	21031	TEX14,KNL1,CENPF,CLSPN,CRADD,NDC80,NUF2
GO:BP	negative regulation of mitotic nuclear division	GO:0045839	FALSE	0.0150552	1.82231	56	100	5	21031	TEX14,KNL1,CENPF,NDC80,NUF2
GO:BP	mitotic nuclear division	GO:0140014	FALSE	0.0161267	1.79246	279	100	9	21031	MKI67,CDC14A,TEX14,KNL1,CENPF,NDC80,KIF18A,NUF2,KIF14
GO:BP	negative regulation of organelle organization	GO:0010639	FALSE	0.0187496	1.72701	361	100	10	21031	DIAPH3,TOP2A,TFRC,TEX14,KNL1,CENPF,STMN1,MAPT,NDC80,NUF2
GO:BP	regulation of mitotic sister chromatid separation	GO:0010965	FALSE	0.0195107	1.70973	59	100	5	21031	TEX14,KNL1,CENPF,NDC80,NUF2
GO:BP	chromosome organization	GO:0051276	FALSE	0.0213036	1.67155	635	100	13	21031	TOP2A,TEX14,KNL1,CENPF,BRIP1,MAPT,NDC80,HELB,KIF18A,NUF2,MCMDC2,NAF1,KIF14
GO:BP	meiotic cell cycle process	GO:1903046	FALSE	0.0216381	1.66478	219	100	8	21031	TOP2A,ASPM,TEX14,KNL1,BRIP1,NDC80,KIF18A,NUF2
GO:BP	meiotic cell cycle	GO:0051321	FALSE	0.0219893	1.65779	290	100	9	21031	TOP2A,ASPM,TEX14,KNL1,BRIP1,NDC80,KIF18A,NUF2,MCMDC2
GO:BP	mitotic sister chromatid separation	GO:0051306	FALSE	0.0249358	1.60318	62	100	5	21031	TEX14,KNL1,CENPF,NDC80,NUF2
GO:BP	intracellular signal transduction	GO:0035556	FALSE	0.0250113	1.60186	2668	100	29	21031	TANK,PELI1,PLCL1,TFRC,VAV3,TEX14,KNL1,SESN3,PDE4D,CENPF,CLSPN,BRIP1,STMN1,DUSP16,RALGAPA2,KLB,CRADD,BCL2,GBP1,PDE3B,OVOL2,MAPT,NDC80,ARHGAP11B,NR4A3,DEPDC1B,NUF2,BIRC3,KIF14
GO:BP	negative regulation of nuclear division	GO:0051784	FALSE	0.0269839	1.5689	63	100	5	21031	TEX14,KNL1,CENPF,NDC80,NUF2
GO:BP	immune response-activating signaling pathway	GO:0002757	FALSE	0.028783	1.54086	465	100	11	21031	IGLC3,IGHA1,PELI1,VAV3,IGHM,PDE4D,IGHG1,BCL2,GBP1,NR4A3,BIRC3
GO:BP	cell division	GO:0051301	TRUE	0.0300808	1.52171	656	100	13	21031	MLLT3,BIN3,TOP2A,CDC14A,ASPM,TEX14,KNL1,CENPF,BRIP1,STMN1,NDC80,NUF2,KIF14
GO:BP	negative regulation of cell cycle process	GO:0010948	FALSE	0.0303765	1.51746	302	100	9	21031	TEX14,KNL1,CENPF,CLSPN,BRIP1,CRADD,BCL2,NDC80,NUF2
GO:BP	sister chromatid segregation	GO:0000819	FALSE	0.0308765	1.51037	230	100	8	21031	TOP2A,TEX14,KNL1,CENPF,NDC80,KIF18A,NUF2,KIF14
GO:BP	negative regulation of mitotic cell cycle	GO:0045930	FALSE	0.0328699	1.4832	232	100	8	21031	TEX14,KNL1,CENPF,CLSPN,CRADD,BCL2,NDC80,NUF2
GO:BP	regulation of cell cycle	GO:0051726	FALSE	0.0364002	1.4389	1105	100	17	21031	MKI67,CDC14A,ASPM,TEX14,KNL1,CENPF,CLSPN,BRIP1,EIF4E,CRADD,BCL2,OVOL2,NDC80,STIL,NUF2,BIRC3,KIF14
GO:BP	mitotic cell cycle	GO:0000278	FALSE	0.0453655	1.34327	895	100	15	21031	MKI67,CDC14A,TEX14,KNL1,CENPF,CLSPN,STMN1,EIF4E,CRADD,BCL2,NDC80,STIL,KIF18A,NUF2,KIF14
GO:BP	regulation of mitotic nuclear division	GO:0007088	FALSE	0.0462982	1.33444	118	100	6	21031	MKI67,TEX14,KNL1,CENPF,NDC80,NUF2
GO:BP	immune response-regulating signaling pathway	GO:0002764	FALSE	0.0485034	1.31423	492	100	11	21031	IGLC3,IGHA1,PELI1,VAV3,IGHM,PDE4D,IGHG1,BCL2,GBP1,NR4A3,BIRC3

## Sheet: SD10
Supplementary Data 10. Tcell shared gene enrichment
source	term_name	term_id	highlighted	adjusted_p_value	negative_log10_of_adjusted_p_value	term_size	query_size	intersection_size	effective_domain_size	intersections
GO:BP	multicellular organismal process	GO:0032501	TRUE	1.13735e-14	13.9441	7669	138	100	21031	SEMA3A,PREX2,MS4A1,ITGB8,CD79A,VWF,PTPRB,FGF10,CLIC5,FCER1A,EMCN,BANK1,CCL5,RBM47,CALCRL,F13A1,BCL11B,SLC8A1,PCSK6,MFAP5,SEMA5A,RTN1,LMCD1,ABI3BP,COL5A2,ADGRB3,THBS2,MARCO,TNXB,GJB2,FCRL1,CD1C,RHOJ,SLC11A1,ADAMTSL1,AQP9,SEMA3C,WDFY4,ITGAX,CRTAC1,MSR1,SNTG2,POSTN,SMOC1,ASPN,PTGIS,ADAMTS5,NEGR1,FLT3,ADAMTS9,VEGFC,POU2AF1,THEMIS,OLR1,IGF1,SLCO2B1,SFRP4,PCDH17,TANC1,MZB1,ABCC9,EFNA5,COL6A1,CTLA4,PLVA…
GO:BP	response to stimulus	GO:0050896	FALSE	8.36569e-12	11.0775	8976	138	104	21031	SEMA3A,PREX2,MS4A1,ITGB8,CD79A,VWF,FGF10,ADGRL4,CLIC5,FCER1A,BANK1,CCL5,RBM47,CALCRL,CD163,F13A1,RAPGEF4,SLC8A1,PCSK6,SEMA5A,ADGRL2,MCTP1,ITGBL1,LMCD1,ABI3BP,COL5A2,ADGRB3,MARCO,BLK,ZNF385B,TNXB,GJB2,ME1,SKAP1,CD1C,RHOJ,SLC11A1,AQP9,SEMA3C,WDFY4,ITGAX,MSR1,RALGPS2,POSTN,ASPN,PTGIS,ADAMTS5,MAGI1,GPC6,FLT3,ADAMTS9,VEGFC,POU2AF1,ADCY4,THEMIS,OLR1,IGF1,SLCO2B1,SFRP4,TANC1,MZB1,PDE1A,ABCC9,EFNA5,FCRL5…
GO:BP	cell surface receptor signaling pathway	GO:0007166	FALSE	1.04518e-11	10.9808	2799	138	55	21031	SEMA3A,MS4A1,ITGB8,CD79A,FGF10,ADGRL4,FCER1A,BANK1,CCL5,RBM47,CALCRL,PCSK6,SEMA5A,ADGRL2,ITGBL1,ADGRB3,MARCO,BLK,TNXB,SKAP1,SEMA3C,ITGAX,POSTN,ASPN,MAGI1,FLT3,VEGFC,THEMIS,IGF1,SFRP4,MZB1,EFNA5,FCRL5,CTLA4,PLVAP,ENPP1,BMP6,SFRP1,ACKR1,MERTK,CD86,EDNRA,IL7R,LYN,BICC1,PADI2,SHANK3,EREG,PLAUR,PRKCQ,TLR2,NOTCH3,COL4A1,EYA2,TIE1
GO:BP	cell adhesion	GO:0007155	FALSE	4.44558e-10	9.35207	1512	138	38	21031	ITGB8,VWF,EMCN,CCL5,SEMA5A,ITGBL1,ABI3BP,THBS2,TNXB,SKAP1,ADAMTSL1,ITGAX,POSTN,NEGR1,MAGI1,ADAMTS9,OLR1,PGM5,IGF1,PCDH17,EFNA5,NUAK1,COL6A1,CTLA4,BMP6,SFRP1,COL14A1,MERTK,CD86,FBLN2,NTN4,IL7R,LYN,FOLR2,MMRN1,PLAUR,PRKCQ,CNTNAP3B
GO:BP	leukocyte activation	GO:0045321	FALSE	2.64001e-08	7.57839	946	138	28	21031	MS4A1,ITGB8,CD79A,FGF10,FCER1A,BANK1,CCL5,BCL11B,FCRL1,CD1C,SLC11A1,WDFY4,FLT3,POU2AF1,THEMIS,IGF1,MZB1,CTLA4,SFRP1,DNASE1L3,MERTK,CD86,IL7R,LYN,NKG7,PRKCQ,TLR2,C1QA
GO:BP	cell activation	GO:0001775	FALSE	2.78954e-08	7.55447	1092	138	30	21031	MS4A1,ITGB8,CD79A,VWF,FGF10,FCER1A,BANK1,CCL5,BCL11B,FCRL1,CD1C,SLC11A1,WDFY4,FLT3,POU2AF1,THEMIS,IGF1,MZB1,CTLA4,SFRP1,DNASE1L3,MERTK,CD86,IL7R,LYN,MMRN1,NKG7,PRKCQ,TLR2,C1QA
GO:BP	cell communication	GO:0007154	FALSE	2.79335e-08	7.55387	6537	138	81	21031	SEMA3A,PREX2,MS4A1,ITGB8,CD79A,VWF,FGF10,ADGRL4,FCER1A,BANK1,CCL5,RBM47,CALCRL,RAPGEF4,SLC8A1,PCSK6,SEMA5A,ADGRL2,MCTP1,ITGBL1,LMCD1,ADGRB3,MARCO,BLK,ZNF385B,TNXB,GJB2,SKAP1,RHOJ,SEMA3C,ITGAX,MYRIP,RALGPS2,POSTN,ASPN,PTGIS,MAGI1,GPC6,FLT3,VEGFC,ADCY4,THEMIS,IGF1,SFRP4,PCDH17,MZB1,PDE1A,EFNA5,FCRL5,CNKSR3,NUAK1,CTLA4,PLVAP,ENPP1,BMP6,SFRP1,ACKR1,MERTK,CD86,EDNRA,NTN4,IL7R,LYN,RGS5,OLFM3,FOLR2,BICC…
GO:BP	anatomical structure development	GO:0048856	FALSE	3.48564e-08	7.45772	5899	138	76	21031	SEMA3A,PREX2,MS4A1,ITGB8,CD79A,PTPRB,FGF10,EMCN,RBM47,CALCRL,BCL11B,SLC8A1,PCSK6,MFAP5,SEMA5A,RTN1,ABI3BP,COL5A2,ADGRB3,THBS2,TNXB,GJB2,RHOJ,ADAMTSL1,SEMA3C,ITGAX,CRTAC1,SNTG2,POSTN,SMOC1,ASPN,PTGIS,ADAMTS5,NEGR1,FLT3,ADAMTS9,VEGFC,POU2AF1,THEMIS,PGM5,IGF1,SFRP4,PCDH17,TANC1,ABCC9,EFNA5,COL6A1,CTLA4,STOX2,ENPP1,BMP6,SFRP1,COL14A1,DNASE1L3,MERTK,CD86,EDNRA,NTN4,IL7R,PI16,AFF3,LYN,OLFM3,BICC1,PADI2…
GO:BP	signaling	GO:0023052	FALSE	4.11232e-08	7.38591	6447	138	80	21031	SEMA3A,PREX2,MS4A1,ITGB8,CD79A,VWF,FGF10,ADGRL4,FCER1A,BANK1,CCL5,RBM47,CALCRL,RAPGEF4,SLC8A1,PCSK6,SEMA5A,ADGRL2,MCTP1,ITGBL1,LMCD1,ADGRB3,MARCO,BLK,ZNF385B,TNXB,GJB2,SKAP1,RHOJ,SEMA3C,ITGAX,MYRIP,RALGPS2,POSTN,ASPN,PTGIS,MAGI1,GPC6,FLT3,VEGFC,ADCY4,THEMIS,IGF1,SFRP4,PCDH17,MZB1,PDE1A,EFNA5,FCRL5,CNKSR3,NUAK1,CTLA4,PLVAP,ENPP1,BMP6,SFRP1,ACKR1,MERTK,CD86,EDNRA,NTN4,IL7R,LYN,RGS5,OLFM3,BICC1,PADI…
GO:BP	developmental process	GO:0032502	FALSE	4.32992e-08	7.36352	6453	138	80	21031	SEMA3A,PREX2,MS4A1,ITGB8,CD79A,PTPRB,FGF10,EMCN,RBM47,CALCRL,BCL11B,SLC8A1,PCSK6,MFAP5,SEMA5A,RTN1,ABI3BP,COL5A2,ADGRB3,THBS2,BLK,TNXB,GJB2,RHOJ,ADAMTSL1,SEMA3C,ITGAX,CRTAC1,MSR1,SNTG2,POSTN,SMOC1,ASPN,PTGIS,ADAMTS5,NEGR1,FLT3,ADAMTS9,VEGFC,POU2AF1,THEMIS,PGM5,IGF1,SFRP4,PCDH17,TANC1,ABCC9,EFNA5,COL6A1,CTLA4,PLVAP,STOX2,ENPP1,BMP6,SFRP1,COL14A1,DNASE1L3,MERTK,CD86,EDNRA,NTN4,IL7R,PI16,AFF3,LYN,OL…
GO:BP	cell differentiation	GO:0030154	FALSE	6.99545e-08	7.15518	4366	138	63	21031	SEMA3A,PREX2,MS4A1,ITGB8,CD79A,PTPRB,FGF10,RBM47,BCL11B,SLC8A1,MFAP5,SEMA5A,RTN1,ABI3BP,COL5A2,ADGRB3,BLK,TNXB,ADAMTSL1,SEMA3C,CRTAC1,MSR1,POSTN,SMOC1,ADAMTS5,NEGR1,FLT3,ADAMTS9,VEGFC,POU2AF1,THEMIS,PGM5,IGF1,SFRP4,TANC1,EFNA5,COL6A1,CTLA4,ENPP1,BMP6,SFRP1,COL14A1,DNASE1L3,MERTK,CD86,EDNRA,NTN4,IL7R,PI16,LYN,OLFM3,SHANK3,KAZN,EREG,PRKCQ,TLR2,NOTCH3,COL4A1,C1QA,PDE3A,EYA2,RAI14,TIE1
GO:BP	cellular developmental process	GO:0048869	FALSE	7.06678e-08	7.15078	4367	138	63	21031	SEMA3A,PREX2,MS4A1,ITGB8,CD79A,PTPRB,FGF10,RBM47,BCL11B,SLC8A1,MFAP5,SEMA5A,RTN1,ABI3BP,COL5A2,ADGRB3,BLK,TNXB,ADAMTSL1,SEMA3C,CRTAC1,MSR1,POSTN,SMOC1,ADAMTS5,NEGR1,FLT3,ADAMTS9,VEGFC,POU2AF1,THEMIS,PGM5,IGF1,SFRP4,TANC1,EFNA5,COL6A1,CTLA4,ENPP1,BMP6,SFRP1,COL14A1,DNASE1L3,MERTK,CD86,EDNRA,NTN4,IL7R,PI16,LYN,OLFM3,SHANK3,KAZN,EREG,PRKCQ,TLR2,NOTCH3,COL4A1,C1QA,PDE3A,EYA2,RAI14,TIE1
GO:BP	regulation of multicellular organismal process	GO:0051239	FALSE	9.05352e-08	7.04318	2955	138	50	21031	SEMA3A,ITGB8,FGF10,BANK1,CCL5,RBM47,SLC8A1,SEMA5A,LMCD1,ABI3BP,ADGRB3,THBS2,TNXB,RHOJ,SLC11A1,SEMA3C,ITGAX,POSTN,ASPN,PTGIS,ADAMTS5,ADAMTS9,VEGFC,POU2AF1,IGF1,SFRP4,MZB1,ABCC9,EFNA5,CTLA4,ENPP1,BMP6,SFRP1,COL14A1,ACKR1,MERTK,CD86,EDNRA,NTN4,IL7R,PI16,LYN,SHANK3,MMRN1,EREG,PLAUR,PRKCQ,TLR2,PDE3A,TIE1
GO:BP	multicellular organism development	GO:0007275	FALSE	1.04221e-07	6.98205	4643	138	65	21031	SEMA3A,PREX2,ITGB8,PTPRB,FGF10,EMCN,CALCRL,BCL11B,SLC8A1,PCSK6,MFAP5,SEMA5A,RTN1,ABI3BP,COL5A2,ADGRB3,THBS2,TNXB,GJB2,RHOJ,ADAMTSL1,SEMA3C,ITGAX,CRTAC1,SNTG2,POSTN,SMOC1,ASPN,PTGIS,ADAMTS5,NEGR1,ADAMTS9,VEGFC,IGF1,SFRP4,PCDH17,ABCC9,EFNA5,COL6A1,CTLA4,STOX2,ENPP1,BMP6,SFRP1,COL14A1,MERTK,CD86,EDNRA,NTN4,IL7R,PI16,AFF3,LYN,OLFM3,BICC1,PADI2,SHANK3,EREG,PRKCQ,TLR2,NOTCH3,COL4A1,C1QA,EYA2,TIE1
GO:BP	cellular response to stimulus	GO:0051716	FALSE	1.08251e-07	6.96557	7394	138	86	21031	SEMA3A,PREX2,MS4A1,ITGB8,CD79A,VWF,FGF10,ADGRL4,FCER1A,BANK1,CCL5,RBM47,CALCRL,RAPGEF4,SLC8A1,PCSK6,SEMA5A,ADGRL2,MCTP1,ITGBL1,LMCD1,COL5A2,ADGRB3,MARCO,BLK,ZNF385B,TNXB,GJB2,SKAP1,RHOJ,SLC11A1,AQP9,SEMA3C,ITGAX,MSR1,RALGPS2,POSTN,ASPN,PTGIS,MAGI1,GPC6,FLT3,VEGFC,ADCY4,THEMIS,IGF1,SLCO2B1,SFRP4,MZB1,PDE1A,EFNA5,FCRL5,CNKSR3,NUAK1,COL6A1,CTLA4,PLVAP,ENPP1,BMP6,SFRP1,ACKR1,MERTK,CD86,EDNRA,RAB31,IL…
GO:BP	signal transduction	GO:0007165	FALSE	1.85321e-07	6.73208	5959	138	75	21031	SEMA3A,PREX2,MS4A1,ITGB8,CD79A,VWF,FGF10,ADGRL4,FCER1A,BANK1,CCL5,RBM47,CALCRL,RAPGEF4,SLC8A1,PCSK6,SEMA5A,ADGRL2,MCTP1,ITGBL1,LMCD1,ADGRB3,MARCO,BLK,ZNF385B,TNXB,SKAP1,RHOJ,SEMA3C,ITGAX,RALGPS2,POSTN,ASPN,PTGIS,MAGI1,GPC6,FLT3,VEGFC,ADCY4,THEMIS,IGF1,SFRP4,MZB1,PDE1A,EFNA5,FCRL5,CNKSR3,NUAK1,CTLA4,PLVAP,ENPP1,BMP6,SFRP1,ACKR1,MERTK,CD86,EDNRA,IL7R,LYN,RGS5,OLFM3,BICC1,PADI2,SHANK3,EREG,NKG7,PLAU…
GO:BP	circulatory system development	GO:0072359	FALSE	1.54927e-06	5.80987	1130	138	28	21031	ITGB8,PTPRB,FGF10,EMCN,CALCRL,SLC8A1,SEMA5A,ABI3BP,ADGRB3,THBS2,RHOJ,SEMA3C,ITGAX,PTGIS,ADAMTS5,ADAMTS9,VEGFC,IGF1,ABCC9,SFRP1,COL14A1,EDNRA,PI16,BICC1,EREG,NOTCH3,COL4A1,TIE1
GO:BP	lymphocyte activation	GO:0046649	FALSE	2.53196e-06	5.59654	783	138	23	21031	MS4A1,CD79A,FGF10,BANK1,CCL5,BCL11B,FCRL1,CD1C,SLC11A1,WDFY4,FLT3,POU2AF1,THEMIS,IGF1,MZB1,CTLA4,SFRP1,MERTK,CD86,IL7R,LYN,NKG7,PRKCQ
GO:BP	regulation of response to stimulus	GO:0048583	FALSE	3.19996e-06	5.49486	3939	138	56	21031	SEMA3A,PREX2,MS4A1,CD79A,VWF,FGF10,FCER1A,BANK1,CCL5,RBM47,PCSK6,SEMA5A,MCTP1,LMCD1,MARCO,BLK,TNXB,SKAP1,CD1C,SLC11A1,SEMA3C,POSTN,ASPN,PTGIS,GPC6,FLT3,VEGFC,THEMIS,IGF1,SFRP4,MZB1,CNKSR3,NUAK1,CTLA4,ENPP1,BMP6,SFRP1,DNASE1L3,CD86,IL7R,PI16,LYN,RGS5,BICC1,PADI2,SHANK3,MMRN1,EREG,NKG7,PLAUR,PRKCQ,TLR2,C1QA,PDE3A,EYA2,GPAT3
GO:BP	angiogenesis	GO:0001525	FALSE	4.02755e-06	5.39496	538	138	19	21031	ITGB8,PTPRB,FGF10,EMCN,CALCRL,SEMA5A,ADGRB3,THBS2,RHOJ,ITGAX,PTGIS,ADAMTS9,VEGFC,SFRP1,EDNRA,EREG,NOTCH3,COL4A1,TIE1
GO:BP	anatomical structure formation involved in morphogenesis	GO:0048646	FALSE	4.2871e-06	5.36784	1183	138	28	21031	ITGB8,PTPRB,FGF10,EMCN,CALCRL,SEMA5A,COL5A2,ADGRB3,THBS2,RHOJ,SEMA3C,ITGAX,PTGIS,ADAMTS5,ADAMTS9,VEGFC,PGM5,TANC1,COL6A1,SFRP1,EDNRA,SHANK3,EREG,TLR2,NOTCH3,COL4A1,EYA2,TIE1
GO:BP	anatomical structure morphogenesis	GO:0009653	FALSE	5.82466e-06	5.23473	2684	138	44	21031	SEMA3A,PREX2,ITGB8,PTPRB,FGF10,EMCN,CALCRL,BCL11B,MFAP5,SEMA5A,COL5A2,ADGRB3,THBS2,RHOJ,ADAMTSL1,SEMA3C,ITGAX,POSTN,ASPN,PTGIS,ADAMTS5,ADAMTS9,VEGFC,PGM5,SFRP4,TANC1,ABCC9,EFNA5,COL6A1,BMP6,SFRP1,EDNRA,NTN4,IL7R,AFF3,OLFM3,SHANK3,EREG,PRKCQ,TLR2,NOTCH3,COL4A1,EYA2,TIE1
GO:BP	response to organic substance	GO:0010033	FALSE	1.11221e-05	4.95381	2637	138	43	21031	FGF10,CCL5,RBM47,CALCRL,SLC8A1,COL5A2,GJB2,ME1,SLC11A1,AQP9,MSR1,POSTN,PTGIS,FLT3,VEGFC,IGF1,SFRP4,MZB1,ABCC9,EFNA5,COL6A1,PLVAP,ENPP1,BMP6,SFRP1,ACKR1,CD86,EDNRA,RAB31,IL7R,AFF3,LYN,PCOLCE2,FOLR2,PADI2,SHANK3,EREG,PRKCQ,MRC1,TLR2,COL4A1,PDE3A,TIE1
GO:BP	system development	GO:0048731	FALSE	1.31524e-05	4.881	3973	138	55	21031	SEMA3A,PREX2,ITGB8,PTPRB,FGF10,EMCN,CALCRL,BCL11B,SLC8A1,MFAP5,SEMA5A,RTN1,ABI3BP,COL5A2,ADGRB3,THBS2,TNXB,RHOJ,ADAMTSL1,SEMA3C,ITGAX,CRTAC1,SNTG2,POSTN,SMOC1,PTGIS,ADAMTS5,NEGR1,ADAMTS9,VEGFC,IGF1,SFRP4,PCDH17,ABCC9,EFNA5,BMP6,SFRP1,COL14A1,MERTK,EDNRA,NTN4,IL7R,PI16,LYN,OLFM3,BICC1,PADI2,SHANK3,EREG,PRKCQ,TLR2,NOTCH3,COL4A1,C1QA,TIE1
GO:BP	blood vessel development	GO:0001568	FALSE	1.63828e-05	4.78561	721	138	21	21031	ITGB8,PTPRB,FGF10,EMCN,CALCRL,SEMA5A,ADGRB3,THBS2,RHOJ,SEMA3C,ITGAX,PTGIS,ADAMTS9,VEGFC,ABCC9,SFRP1,EDNRA,EREG,NOTCH3,COL4A1,TIE1
GO:BP	cell development	GO:0048468	FALSE	2.62398e-05	4.58104	2819	138	44	21031	SEMA3A,PREX2,MS4A1,ITGB8,CD79A,RBM47,BCL11B,SLC8A1,MFAP5,SEMA5A,ADGRB3,TNXB,ADAMTSL1,SEMA3C,CRTAC1,POSTN,NEGR1,FLT3,VEGFC,POU2AF1,THEMIS,PGM5,IGF1,EFNA5,CTLA4,BMP6,SFRP1,COL14A1,DNASE1L3,MERTK,CD86,EDNRA,NTN4,IL7R,PI16,LYN,OLFM3,SHANK3,EREG,PRKCQ,TLR2,NOTCH3,C1QA,PDE3A
GO:BP	vasculature development	GO:0001944	FALSE	3.39e-05	4.4698	752	138	21	21031	ITGB8,PTPRB,FGF10,EMCN,CALCRL,SEMA5A,ADGRB3,THBS2,RHOJ,SEMA3C,ITGAX,PTGIS,ADAMTS9,VEGFC,ABCC9,SFRP1,EDNRA,EREG,NOTCH3,COL4A1,TIE1
GO:BP	blood vessel morphogenesis	GO:0048514	FALSE	4.51115e-05	4.34571	625	138	19	21031	ITGB8,PTPRB,FGF10,EMCN,CALCRL,SEMA5A,ADGRB3,THBS2,RHOJ,ITGAX,PTGIS,ADAMTS9,VEGFC,SFRP1,EDNRA,EREG,NOTCH3,COL4A1,TIE1
GO:BP	response to endogenous stimulus	GO:0009719	FALSE	4.79312e-05	4.31938	1678	138	32	21031	ITGB8,FGF10,CCL5,SLC8A1,PCSK6,COL5A2,TNXB,GJB2,ME1,AQP9,POSTN,ASPN,FLT3,VEGFC,IGF1,SFRP4,MZB1,EFNA5,COL6A1,ENPP1,BMP6,SFRP1,EDNRA,RAB31,LYN,FOLR2,PADI2,EREG,PRKCQ,TLR2,COL4A1,PDE3A
GO:BP	regulation of multicellular organismal development	GO:2000026	FALSE	4.94035e-05	4.30624	1411	138	29	21031	SEMA3A,ITGB8,FGF10,SLC8A1,SEMA5A,ADGRB3,THBS2,RHOJ,SEMA3C,ITGAX,ASPN,PTGIS,ADAMTS9,VEGFC,IGF1,SFRP4,EFNA5,CTLA4,ENPP1,BMP6,SFRP1,COL14A1,CD86,IL7R,PI16,LYN,SHANK3,TLR2,TIE1
GO:BP	cellular response to organic substance	GO:0071310	FALSE	5.50747e-05	4.25905	1971	138	35	21031	CCL5,RBM47,CALCRL,SLC8A1,COL5A2,GJB2,AQP9,MSR1,POSTN,PTGIS,FLT3,VEGFC,IGF1,MZB1,EFNA5,COL6A1,PLVAP,ENPP1,BMP6,SFRP1,ACKR1,CD86,EDNRA,RAB31,IL7R,LYN,PCOLCE2,FOLR2,PADI2,EREG,PRKCQ,MRC1,TLR2,COL4A1,PDE3A
GO:BP	regulation of cell adhesion	GO:0030155	FALSE	6.06287e-05	4.21732	778	138	21	21031	EMCN,CCL5,SEMA5A,ABI3BP,TNXB,SKAP1,POSTN,MAGI1,IGF1,EFNA5,NUAK1,CTLA4,BMP6,SFRP1,CD86,FBLN2,IL7R,LYN,MMRN1,PLAUR,PRKCQ
GO:BP	cellular response to endogenous stimulus	GO:0071495	FALSE	6.81106e-05	4.16679	1432	138	29	21031	ITGB8,FGF10,CCL5,SLC8A1,PCSK6,COL5A2,TNXB,GJB2,AQP9,POSTN,ASPN,FLT3,VEGFC,IGF1,SFRP4,MZB1,EFNA5,COL6A1,ENPP1,BMP6,SFRP1,EDNRA,RAB31,LYN,FOLR2,PADI2,PRKCQ,COL4A1,PDE3A
GO:BP	response to external stimulus	GO:0009605	FALSE	8.98332e-05	4.04656	2723	138	42	21031	SEMA3A,MS4A1,ITGB8,FGF10,BANK1,CCL5,RBM47,SLC8A1,SEMA5A,MARCO,BLK,GJB2,SLC11A1,SEMA3C,WDFY4,ITGAX,POSTN,PTGIS,ADAMTS5,ADAMTS9,VEGFC,POU2AF1,IGF1,ABCC9,EFNA5,NUAK1,BMP6,SFRP1,DNASE1L3,CD86,IL7R,LYN,FOLR2,PADI2,MMRN1,EREG,NKG7,PLAUR,PRKCQ,MRC1,TLR2,C1QA
GO:BP	regulation of developmental process	GO:0050793	FALSE	0.000147373	3.83158	2455	138	39	21031	SEMA3A,ITGB8,FGF10,BCL11B,SLC8A1,SEMA5A,ABI3BP,COL5A2,ADGRB3,THBS2,TNXB,RHOJ,SEMA3C,ITGAX,MSR1,SMOC1,ASPN,PTGIS,ADAMTS9,VEGFC,IGF1,SFRP4,EFNA5,CTLA4,ENPP1,BMP6,SFRP1,COL14A1,CD86,NTN4,IL7R,PI16,LYN,SHANK3,EREG,TLR2,NOTCH3,PDE3A,TIE1
GO:BP	immune system process	GO:0002376	FALSE	0.000155297	3.80884	2776	138	42	21031	MS4A1,ITGB8,CD79A,FGF10,FCER1A,BANK1,CCL5,RBM47,BCL11B,RAPGEF4,MARCO,BLK,SKAP1,FCRL1,CD1C,SLC11A1,SEMA3C,WDFY4,FLT3,VEGFC,POU2AF1,THEMIS,OLR1,IGF1,MZB1,CTLA4,PLVAP,ENPP1,BMP6,SFRP1,DNASE1L3,MERTK,CD86,IL7R,LYN,PADI2,EREG,NKG7,PRKCQ,MRC1,TLR2,C1QA
GO:BP	lymphocyte proliferation	GO:0046651	FALSE	0.000204974	3.6883	308	138	13	21031	MS4A1,CD79A,FGF10,CCL5,SLC11A1,FLT3,IGF1,MZB1,CTLA4,CD86,IL7R,LYN,PRKCQ
GO:BP	animal organ development	GO:0048513	FALSE	0.000243576	3.61337	3039	138	44	21031	SEMA3A,ITGB8,FGF10,CALCRL,BCL11B,SLC8A1,MFAP5,SEMA5A,RTN1,ABI3BP,COL5A2,TNXB,GJB2,RHOJ,SEMA3C,ITGAX,SMOC1,ASPN,ADAMTS5,FLT3,ADAMTS9,VEGFC,IGF1,SFRP4,ABCC9,STOX2,ENPP1,BMP6,SFRP1,COL14A1,MERTK,EDNRA,NTN4,IL7R,PI16,OLFM3,BICC1,PADI2,SHANK3,KAZN,EREG,NOTCH3,COL4A1,TIE1
GO:BP	mononuclear cell proliferation	GO:0032943	FALSE	0.000265578	3.57581	315	138	13	21031	MS4A1,CD79A,FGF10,CCL5,SLC11A1,FLT3,IGF1,MZB1,CTLA4,CD86,IL7R,LYN,PRKCQ
GO:BP	positive regulation of biological process	GO:0048518	FALSE	0.000281813	3.55004	6250	138	70	21031	SEMA3A,MS4A1,ITGB8,CD79A,VWF,FGF10,BANK1,CCL5,RBM47,CALCRL,BCL11B,RAPGEF4,SLC8A1,SEMA5A,LMCD1,ABI3BP,ADGRB3,THBS2,MARCO,BLK,TNXB,SKAP1,PKIB,CD1C,RHOJ,SLC11A1,SEMA3C,ITGAX,PARM1,MYRIP,MSR1,POSTN,PTGIS,NEGR1,MAGI1,FLT3,ADAMTS9,VEGFC,POU2AF1,THEMIS,IGF1,SFRP4,MZB1,EFNA5,CNKSR3,CTLA4,PLVAP,BMP6,SFRP1,MERTK,CD86,EDNRA,FBLN2,RAB31,IL7R,LYN,FOLR2,PADI2,SHANK3,MMRN1,EREG,NKG7,PLAUR,PRKCQ,TLR2,NOTCH3,C1QA…
GO:BP	regulation of biological quality	GO:0065008	FALSE	0.00031218	3.50559	2846	138	42	21031	SEMA3A,VWF,FGF10,CCL5,RBM47,F13A1,RAPGEF4,SLC8A1,PCSK6,SEMA5A,MCTP1,ADGRB3,THBS2,BLK,RHOJ,SLC11A1,SEMA3C,MYRIP,POSTN,NEGR1,GPC6,VEGFC,IGF1,TANC1,ABCC9,EFNA5,DMXL2,PLVAP,BMP6,SFRP1,MERTK,EDNRA,IL7R,LYN,BACE2,SHANK3,MMRN1,PLAUR,PRKCQ,TLR2,PDE3A,EYA2
GO:BP	extracellular matrix organization	GO:0030198	TRUE	0.000366927	3.43542	324	138	13	21031	COL22A1,ABI3BP,COL5A2,TNXB,ADAMTSL1,POSTN,SMOC1,ADAMTS5,ADAMTS9,COL14A1,NTN4,COL4A1,TIE1
GO:BP	extracellular structure organization	GO:0043062	FALSE	0.000380097	3.42011	325	138	13	21031	COL22A1,ABI3BP,COL5A2,TNXB,ADAMTSL1,POSTN,SMOC1,ADAMTS5,ADAMTS9,COL14A1,NTN4,COL4A1,TIE1
GO:BP	external encapsulating structure organization	GO:0045229	FALSE	0.00039369	3.40485	326	138	13	21031	COL22A1,ABI3BP,COL5A2,TNXB,ADAMTSL1,POSTN,SMOC1,ADAMTS5,ADAMTS9,COL14A1,NTN4,COL4A1,TIE1
GO:BP	regulation of biological process	GO:0050789	FALSE	0.000404089	3.39352	12287	138	109	21031	SEMA3A,PREX2,MS4A1,ITGB8,CD79A,VWF,FGF10,ADGRL4,FCER1A,EMCN,BANK1,CCL5,RBM47,CALCRL,BCL11B,RAPGEF4,SLC8A1,PCSK6,SEMA5A,ADGRL2,MCTP1,ITGBL1,RTN1,LMCD1,ABI3BP,COL5A2,ADGRB3,THBS2,MARCO,BLK,ZNF385B,TNXB,GJB2,ME1,SKAP1,PKIB,CD1C,RHOJ,SLC11A1,SEMA3C,ITGAX,PARM1,MYRIP,MSR1,RALGPS2,POSTN,SMOC1,ASPN,PTGIS,ADAMTS5,NEGR1,MAGI1,GPC6,FLT3,ADAMTS9,VEGFC,POU2AF1,ADCY4,THEMIS,IGF1,SFRP4,PCDH17,TANC1,MZB1,PDE1A,…
GO:BP	regulation of cell communication	GO:0010646	FALSE	0.000449077	3.34768	3443	138	47	21031	SEMA3A,PREX2,ITGB8,VWF,FGF10,BANK1,CCL5,RBM47,RAPGEF4,SLC8A1,PCSK6,SEMA5A,MCTP1,LMCD1,MARCO,BLK,TNXB,MYRIP,POSTN,ASPN,PTGIS,GPC6,FLT3,VEGFC,IGF1,SFRP4,PCDH17,MZB1,EFNA5,CNKSR3,NUAK1,ENPP1,BMP6,SFRP1,CD86,IL7R,LYN,RGS5,BICC1,PADI2,SHANK3,PLAUR,PRKCQ,TLR2,PDE3A,EYA2,GPAT3
GO:BP	biological regulation	GO:0065007	FALSE	0.000502435	3.29892	12680	138	111	21031	SEMA3A,PREX2,MS4A1,ITGB8,CD79A,VWF,FGF10,ADGRL4,FCER1A,EMCN,BANK1,CCL5,RBM47,CALCRL,F13A1,BCL11B,RAPGEF4,SLC8A1,PCSK6,SEMA5A,ADGRL2,MCTP1,ITGBL1,RTN1,LMCD1,ABI3BP,COL5A2,ADGRB3,THBS2,MARCO,BLK,ZNF385B,TNXB,GJB2,ME1,SKAP1,PKIB,CD1C,RHOJ,SLC11A1,SEMA3C,ITGAX,PARM1,MYRIP,MSR1,RALGPS2,POSTN,SMOC1,ASPN,PTGIS,ADAMTS5,NEGR1,MAGI1,GPC6,FLT3,ADAMTS9,VEGFC,POU2AF1,ADCY4,THEMIS,IGF1,SFRP4,PCDH17,TANC1,MZB1,…
GO:BP	enzyme-linked receptor protein signaling pathway	GO:0007167	FALSE	0.000542414	3.26567	967	138	22	21031	ITGB8,FGF10,PCSK6,BLK,TNXB,ASPN,FLT3,VEGFC,IGF1,SFRP4,MZB1,EFNA5,ENPP1,BMP6,SFRP1,MERTK,LYN,EREG,PLAUR,PRKCQ,COL4A1,TIE1
GO:BP	B cell activation	GO:0042113	FALSE	0.000563907	3.24879	281	138	12	21031	MS4A1,CD79A,BANK1,FCRL1,FLT3,POU2AF1,MZB1,CTLA4,SFRP1,CD86,IL7R,LYN
GO:BP	positive regulation of immune system process	GO:0002684	FALSE	0.000589442	3.22956	1054	138	23	21031	MS4A1,CD79A,FGF10,BANK1,CCL5,RBM47,BLK,SKAP1,CD1C,SLC11A1,VEGFC,THEMIS,IGF1,MZB1,CTLA4,PLVAP,CD86,IL7R,LYN,EREG,PRKCQ,TLR2,C1QA
GO:BP	positive regulation of response to stimulus	GO:0048584	FALSE	0.000592347	3.22742	2274	138	36	21031	SEMA3A,MS4A1,CD79A,VWF,FGF10,BANK1,CCL5,RBM47,SEMA5A,LMCD1,MARCO,BLK,TNXB,SKAP1,CD1C,SLC11A1,PTGIS,FLT3,VEGFC,THEMIS,IGF1,SFRP4,CTLA4,BMP6,SFRP1,CD86,IL7R,LYN,SHANK3,EREG,NKG7,PLAUR,PRKCQ,TLR2,C1QA,EYA2
GO:BP	regulation of immune system process	GO:0002682	FALSE	0.000766024	3.11576	1512	138	28	21031	MS4A1,CD79A,FGF10,FCER1A,BANK1,CCL5,RBM47,BLK,SKAP1,CD1C,SLC11A1,VEGFC,THEMIS,IGF1,MZB1,CTLA4,PLVAP,SFRP1,DNASE1L3,MERTK,CD86,IL7R,LYN,PADI2,EREG,PRKCQ,TLR2,C1QA
GO:BP	cell population proliferation	GO:0008283	FALSE	0.000885895	3.05262	2006	138	33	21031	MS4A1,CD79A,FGF10,CCL5,CALCRL,BCL11B,SEMA5A,ABI3BP,TNXB,SLC11A1,ITGAX,FLT3,VEGFC,IGF1,SFRP4,MZB1,PDE1A,ABCC9,NUAK1,CTLA4,BMP6,SFRP1,CD86,EDNRA,IL7R,LYN,FOLR2,SHANK3,EREG,PRKCQ,TLR2,NOTCH3,TIE1
GO:BP	leukocyte proliferation	GO:0070661	FALSE	0.000911058	3.04045	351	138	13	21031	MS4A1,CD79A,FGF10,CCL5,SLC11A1,FLT3,IGF1,MZB1,CTLA4,CD86,IL7R,LYN,PRKCQ
GO:BP	cell-substrate adhesion	GO:0031589	FALSE	0.000911058	3.04045	351	138	13	21031	ITGB8,VWF,ABI3BP,TNXB,SKAP1,ITGAX,POSTN,ADAMTS9,EFNA5,SFRP1,MERTK,FBLN2,NTN4
GO:BP	tissue development	GO:0009888	FALSE	0.000926802	3.03301	2010	138	33	21031	SEMA3A,ITGB8,FGF10,BCL11B,SLC8A1,SEMA5A,COL5A2,TNXB,GJB2,SEMA3C,ITGAX,POSTN,ASPN,ADAMTS5,ADAMTS9,VEGFC,PGM5,IGF1,SFRP4,COL6A1,ENPP1,BMP6,SFRP1,COL14A1,EDNRA,NTN4,PI16,SHANK3,KAZN,EREG,COL4A1,EYA2,TIE1
GO:BP	regulation of signaling	GO:0023051	FALSE	0.00114409	2.94154	3437	138	46	21031	SEMA3A,PREX2,ITGB8,VWF,FGF10,BANK1,CCL5,RBM47,RAPGEF4,PCSK6,SEMA5A,MCTP1,LMCD1,MARCO,BLK,TNXB,MYRIP,POSTN,ASPN,PTGIS,GPC6,FLT3,VEGFC,IGF1,SFRP4,PCDH17,MZB1,EFNA5,CNKSR3,NUAK1,ENPP1,BMP6,SFRP1,CD86,IL7R,LYN,RGS5,BICC1,PADI2,SHANK3,PLAUR,PRKCQ,TLR2,PDE3A,EYA2,GPAT3
GO:BP	response to oxygen-containing compound	GO:1901700	FALSE	0.0015792	2.80156	1663	138	29	21031	FGF10,CALCRL,SLC8A1,COL5A2,GJB2,ME1,SLC11A1,AQP9,POSTN,IGF1,MZB1,ABCC9,EFNA5,COL6A1,ENPP1,BMP6,SFRP1,CD86,EDNRA,RAB31,LYN,FOLR2,EREG,PRKCQ,MRC1,TLR2,COL4A1,PDE3A,TIE1
GO:BP	tube morphogenesis	GO:0035239	FALSE	0.00174352	2.75857	872	138	20	21031	ITGB8,PTPRB,FGF10,EMCN,CALCRL,SEMA5A,ADGRB3,THBS2,RHOJ,ITGAX,PTGIS,ADAMTS9,VEGFC,SFRP1,EDNRA,SHANK3,EREG,NOTCH3,COL4A1,TIE1
GO:BP	regulation of cell differentiation	GO:0045595	FALSE	0.00175168	2.75655	1576	138	28	21031	SEMA3A,FGF10,BCL11B,SEMA5A,ABI3BP,COL5A2,TNXB,SEMA3C,MSR1,SMOC1,ADAMTS9,VEGFC,IGF1,SFRP4,EFNA5,CTLA4,ENPP1,BMP6,SFRP1,CD86,IL7R,PI16,LYN,SHANK3,EREG,TLR2,NOTCH3,PDE3A
GO:BP	positive regulation of developmental process	GO:0051094	FALSE	0.0026187	2.58191	1328	138	25	21031	ITGB8,FGF10,SLC8A1,SEMA5A,ABI3BP,ADGRB3,THBS2,TNXB,ITGAX,MSR1,PTGIS,ADAMTS9,VEGFC,IGF1,SFRP4,EFNA5,BMP6,SFRP1,CD86,IL7R,LYN,SHANK3,TLR2,PDE3A,TIE1
GO:BP	protein phosphorylation	GO:0006468	TRUE	0.003335	2.4769	1346	138	25	21031	FGF10,BANK1,CCL5,SLC8A1,MARCO,BLK,PKIB,SLC11A1,FLT3,VEGFC,IGF1,EFNA5,CNKSR3,NUAK1,ENPP1,BMP6,SFRP1,MERTK,CD86,LYN,EREG,PLAUR,PRKCQ,TLR2,TIE1
GO:BP	neuron remodeling	GO:0016322	TRUE	0.00369404	2.4325	15	138	4	21031	ADGRB3,EDNRA,NTN4,C1QA
GO:BP	positive regulation of cellular process	GO:0048522	FALSE	0.00391985	2.40673	5717	138	63	21031	SEMA3A,MS4A1,ITGB8,VWF,FGF10,BANK1,CCL5,RBM47,CALCRL,BCL11B,RAPGEF4,SEMA5A,LMCD1,ABI3BP,ADGRB3,THBS2,MARCO,BLK,TNXB,SKAP1,PKIB,CD1C,RHOJ,SLC11A1,SEMA3C,ITGAX,PARM1,MYRIP,MSR1,POSTN,PTGIS,NEGR1,MAGI1,FLT3,ADAMTS9,VEGFC,POU2AF1,IGF1,SFRP4,MZB1,EFNA5,CTLA4,PLVAP,BMP6,SFRP1,MERTK,CD86,EDNRA,FBLN2,RAB31,IL7R,LYN,FOLR2,PADI2,SHANK3,MMRN1,EREG,PLAUR,PRKCQ,TLR2,NOTCH3,PDE3A,EYA2
GO:BP	tube development	GO:0035295	FALSE	0.00402072	2.3957	1091	138	22	21031	ITGB8,PTPRB,FGF10,EMCN,CALCRL,SEMA5A,ADGRB3,THBS2,GJB2,RHOJ,SEMA3C,ITGAX,PTGIS,ADAMTS9,VEGFC,SFRP1,EDNRA,SHANK3,EREG,NOTCH3,COL4A1,TIE1
GO:BP	cellular response to oxygen-containing compound	GO:1901701	FALSE	0.00402516	2.39522	1179	138	23	21031	CALCRL,SLC8A1,COL5A2,GJB2,AQP9,POSTN,IGF1,MZB1,EFNA5,COL6A1,ENPP1,BMP6,SFRP1,CD86,EDNRA,RAB31,LYN,FOLR2,PRKCQ,MRC1,TLR2,COL4A1,PDE3A
GO:BP	cellular response to chemical stimulus	GO:0070887	FALSE	0.00408953	2.38833	2683	138	38	21031	CCL5,RBM47,CALCRL,SLC8A1,SEMA5A,COL5A2,GJB2,SLC11A1,AQP9,MSR1,POSTN,PTGIS,FLT3,VEGFC,IGF1,SLCO2B1,MZB1,EFNA5,COL6A1,PLVAP,ENPP1,BMP6,SFRP1,ACKR1,CD86,EDNRA,RAB31,IL7R,LYN,PCOLCE2,FOLR2,PADI2,EREG,PRKCQ,MRC1,TLR2,COL4A1,PDE3A
GO:BP	cellular response to organonitrogen compound	GO:0071417	FALSE	0.00421798	2.3749	610	138	16	21031	SLC8A1,COL5A2,GJB2,AQP9,IGF1,MZB1,COL6A1,ENPP1,SFRP1,EDNRA,RAB31,LYN,FOLR2,PRKCQ,COL4A1,PDE3A
GO:BP	response to chemical	GO:0042221	FALSE	0.00425653	2.37094	3957	138	49	21031	SEMA3A,FGF10,CCL5,RBM47,CALCRL,SLC8A1,SEMA5A,COL5A2,GJB2,ME1,SLC11A1,AQP9,SEMA3C,MSR1,POSTN,ASPN,PTGIS,FLT3,VEGFC,IGF1,SLCO2B1,SFRP4,MZB1,ABCC9,EFNA5,COL6A1,PLVAP,ENPP1,BMP6,SFRP1,ACKR1,CD86,EDNRA,RAB31,IL7R,AFF3,LYN,PCOLCE2,FOLR2,PADI2,SHANK3,EREG,PLAUR,PRKCQ,MRC1,TLR2,COL4A1,PDE3A,TIE1
GO:BP	negative regulation of developmental process	GO:0051093	FALSE	0.00450759	2.34606	928	138	20	21031	SEMA3A,FGF10,SEMA5A,COL5A2,ADGRB3,THBS2,SEMA3C,ASPN,ADAMTS9,VEGFC,IGF1,CTLA4,ENPP1,SFRP1,PI16,LYN,EREG,TLR2,NOTCH3,TIE1
GO:BP	transmembrane receptor protein tyrosine kinase signaling pathway	GO:0007169	FALSE	0.00478083	2.3205	616	138	16	21031	FGF10,BLK,TNXB,FLT3,VEGFC,IGF1,MZB1,EFNA5,ENPP1,MERTK,LYN,EREG,PLAUR,PRKCQ,COL4A1,TIE1
GO:BP	regulation of homotypic cell-cell adhesion	GO:0034110	FALSE	0.00505518	2.29626	35	138	5	21031	CCL5,LYN,MMRN1,PLAUR,PRKCQ
GO:BP	regulation of angiogenesis	GO:0045765	FALSE	0.00522681	2.28176	288	138	11	21031	ITGB8,SEMA5A,ADGRB3,THBS2,RHOJ,ITGAX,PTGIS,ADAMTS9,VEGFC,SFRP1,TIE1
GO:BP	regulation of cellular process	GO:0050794	FALSE	0.00549795	2.2598	11738	138	103	21031	SEMA3A,PREX2,MS4A1,ITGB8,CD79A,VWF,FGF10,ADGRL4,FCER1A,EMCN,BANK1,CCL5,RBM47,CALCRL,BCL11B,RAPGEF4,SLC8A1,PCSK6,SEMA5A,ADGRL2,MCTP1,ITGBL1,LMCD1,ABI3BP,COL5A2,ADGRB3,THBS2,MARCO,BLK,ZNF385B,TNXB,ME1,SKAP1,PKIB,CD1C,RHOJ,SLC11A1,SEMA3C,ITGAX,PARM1,MYRIP,MSR1,RALGPS2,POSTN,SMOC1,ASPN,PTGIS,NEGR1,MAGI1,GPC6,FLT3,ADAMTS9,VEGFC,POU2AF1,ADCY4,THEMIS,IGF1,SFRP4,PCDH17,TANC1,MZB1,PDE1A,EFNA5,FCRL5,CNKSR3…
GO:BP	cell-cell adhesion	GO:0098609	FALSE	0.00601786	2.22056	946	138	20	21031	EMCN,CCL5,TNXB,SKAP1,ITGAX,NEGR1,MAGI1,OLR1,IGF1,PCDH17,EFNA5,CTLA4,BMP6,COL14A1,CD86,IL7R,LYN,MMRN1,PLAUR,PRKCQ
GO:BP	regulation of vasculature development	GO:1901342	FALSE	0.00616389	2.21015	293	138	11	21031	ITGB8,SEMA5A,ADGRB3,THBS2,RHOJ,ITGAX,PTGIS,ADAMTS9,VEGFC,SFRP1,TIE1
GO:BP	positive regulation of immune response	GO:0050778	FALSE	0.00792026	2.10126	718	138	17	21031	MS4A1,CD79A,BANK1,CCL5,RBM47,BLK,SKAP1,CD1C,SLC11A1,THEMIS,CTLA4,CD86,LYN,EREG,PRKCQ,TLR2,C1QA
GO:BP	response to organonitrogen compound	GO:0010243	FALSE	0.00797464	2.09829	964	138	20	21031	SLC8A1,COL5A2,GJB2,AQP9,FLT3,IGF1,MZB1,ABCC9,COL6A1,ENPP1,SFRP1,EDNRA,RAB31,LYN,FOLR2,EREG,PRKCQ,TLR2,COL4A1,PDE3A
GO:BP	regulation of immune response	GO:0050776	FALSE	0.00812339	2.09026	881	138	19	21031	MS4A1,CD79A,FCER1A,BANK1,CCL5,RBM47,BLK,SKAP1,CD1C,SLC11A1,THEMIS,CTLA4,CD86,IL7R,LYN,EREG,PRKCQ,TLR2,C1QA
GO:BP	export from cell	GO:0140352	TRUE	0.0100149	1.99935	894	138	19	21031	FGF10,FCER1A,CCL5,RAPGEF4,SLC8A1,PCSK6,MCTP1,BLK,MYRIP,VEGFC,IGF1,EFNA5,BMP6,SFRP1,MERTK,RAB31,LYN,NKG7,TLR2
GO:BP	positive regulation of multicellular organismal process	GO:0051240	FALSE	0.011361	1.94458	1637	138	27	21031	ITGB8,FGF10,CCL5,RBM47,SLC8A1,SEMA5A,ABI3BP,ADGRB3,THBS2,TNXB,SLC11A1,ITGAX,POSTN,PTGIS,VEGFC,POU2AF1,IGF1,EFNA5,BMP6,CD86,IL7R,LYN,SHANK3,EREG,PRKCQ,TLR2,TIE1
GO:BP	B cell receptor signaling pathway	GO:0050853	TRUE	0.0116474	1.93377	71	138	6	21031	MS4A1,CD79A,BANK1,BLK,CTLA4,LYN
GO:BP	regulation of protein phosphorylation	GO:0001932	FALSE	0.0128851	1.88991	910	138	19	21031	FGF10,BANK1,CCL5,SLC8A1,MARCO,PKIB,SLC11A1,FLT3,VEGFC,IGF1,EFNA5,CNKSR3,ENPP1,BMP6,SFRP1,CD86,LYN,EREG,PLAUR
GO:BP	secretion by cell	GO:0032940	FALSE	0.0130141	1.88558	827	138	18	21031	FGF10,FCER1A,CCL5,RAPGEF4,PCSK6,MCTP1,BLK,MYRIP,VEGFC,IGF1,EFNA5,BMP6,SFRP1,MERTK,RAB31,LYN,NKG7,TLR2
GO:BP	peptidyl-tyrosine phosphorylation	GO:0018108	FALSE	0.0130649	1.88389	258	138	10	21031	FGF10,BANK1,CCL5,BLK,FLT3,IGF1,EFNA5,BMP6,SFRP1,LYN
GO:BP	peptidyl-tyrosine modification	GO:0018212	FALSE	0.0139775	1.85457	260	138	10	21031	FGF10,BANK1,CCL5,BLK,FLT3,IGF1,EFNA5,BMP6,SFRP1,LYN
GO:BP	cellular response to nitrogen compound	GO:1901699	FALSE	0.0143301	1.84375	672	138	16	21031	SLC8A1,COL5A2,GJB2,AQP9,IGF1,MZB1,COL6A1,ENPP1,SFRP1,EDNRA,RAB31,LYN,FOLR2,PRKCQ,COL4A1,PDE3A
GO:BP	regulation of protein secretion	GO:0050708	TRUE	0.0165037	1.78242	265	138	10	21031	CCL5,RAPGEF4,BLK,MYRIP,VEGFC,IGF1,EFNA5,BMP6,SFRP1,TLR2
GO:BP	immune response-regulating cell surface receptor signaling pathway	GO:0002768	FALSE	0.0174189	1.75898	327	138	11	21031	MS4A1,CD79A,FCER1A,BANK1,BLK,SKAP1,THEMIS,CTLA4,LYN,PRKCQ,TLR2
GO:BP	response to cytokine	GO:0034097	FALSE	0.0180431	1.74369	932	138	19	21031	CCL5,RBM47,SLC11A1,POSTN,PTGIS,FLT3,VEGFC,PLVAP,SFRP1,ACKR1,IL7R,AFF3,LYN,PCOLCE2,PADI2,SHANK3,EREG,MRC1,TLR2
GO:BP	regulation of cell population proliferation	GO:0042127	FALSE	0.0188138	1.72552	1683	138	27	21031	FGF10,CCL5,CALCRL,BCL11B,SEMA5A,ABI3BP,TNXB,ITGAX,FLT3,VEGFC,IGF1,SFRP4,MZB1,PDE1A,NUAK1,CTLA4,BMP6,SFRP1,CD86,IL7R,LYN,FOLR2,EREG,PRKCQ,TLR2,NOTCH3,TIE1
GO:BP	positive regulation of peptidyl-tyrosine phosphorylation	GO:0050731	FALSE	0.0199813	1.69938	163	138	8	21031	FGF10,BANK1,CCL5,FLT3,IGF1,EFNA5,BMP6,LYN
GO:BP	cell migration	GO:0016477	TRUE	0.0211358	1.67498	1496	138	25	21031	SEMA3A,PTPRB,FGF10,CCL5,BCL11B,SEMA5A,MCTP1,TNXB,RHOJ,SEMA3C,ITGAX,POSTN,GPC6,ADAMTS9,VEGFC,IGF1,PLVAP,SFRP1,MERTK,EDNRA,NTN4,LYN,PADI2,PRKCQ,TIE1
GO:BP	regulation of peptidyl-tyrosine phosphorylation	GO:0050730	FALSE	0.024507	1.61071	220	138	9	21031	FGF10,BANK1,CCL5,FLT3,IGF1,EFNA5,BMP6,SFRP1,LYN
GO:BP	regulation of signal transduction	GO:0009966	FALSE	0.0247437	1.60654	3010	138	39	21031	SEMA3A,PREX2,VWF,FGF10,BANK1,CCL5,RBM47,PCSK6,SEMA5A,LMCD1,MARCO,TNXB,POSTN,ASPN,PTGIS,GPC6,FLT3,VEGFC,IGF1,SFRP4,MZB1,CNKSR3,NUAK1,ENPP1,BMP6,SFRP1,CD86,IL7R,LYN,RGS5,BICC1,PADI2,SHANK3,PLAUR,PRKCQ,TLR2,PDE3A,EYA2,GPAT3
GO:BP	regulation of phosphate metabolic process	GO:0019220	FALSE	0.0249051	1.60371	1132	138	21	21031	FGF10,BANK1,CCL5,SLC8A1,MARCO,ME1,PKIB,SLC11A1,FLT3,VEGFC,IGF1,EFNA5,CNKSR3,NUAK1,ENPP1,BMP6,SFRP1,CD86,LYN,EREG,PLAUR
GO:BP	regulation of phosphorus metabolic process	GO:0051174	FALSE	0.0252359	1.59798	1133	138	21	21031	FGF10,BANK1,CCL5,SLC8A1,MARCO,ME1,PKIB,SLC11A1,FLT3,VEGFC,IGF1,EFNA5,CNKSR3,NUAK1,ENPP1,BMP6,SFRP1,CD86,LYN,EREG,PLAUR
GO:BP	regulation of cell-cell adhesion	GO:0022407	FALSE	0.0258804	1.58703	477	138	13	21031	CCL5,SKAP1,MAGI1,IGF1,EFNA5,CTLA4,BMP6,CD86,IL7R,LYN,MMRN1,PLAUR,PRKCQ
GO:BP	positive regulation of cell adhesion	GO:0045785	FALSE	0.0258804	1.58703	477	138	13	21031	CCL5,ABI3BP,SKAP1,MAGI1,IGF1,SFRP1,CD86,FBLN2,IL7R,LYN,MMRN1,PLAUR,PRKCQ
GO:BP	positive regulation of cell population proliferation	GO:0008284	FALSE	0.0280642	1.55185	962	138	19	21031	FGF10,CCL5,CALCRL,SEMA5A,TNXB,ITGAX,FLT3,VEGFC,IGF1,MZB1,BMP6,SFRP1,CD86,IL7R,LYN,FOLR2,EREG,PRKCQ,NOTCH3
GO:BP	locomotion	GO:0040011	TRUE	0.0282289	1.54931	1234	138	22	21031	SEMA3A,FGF10,CCL5,SEMA5A,MCTP1,TNXB,RHOJ,SEMA3C,ITGAX,POSTN,ADAMTS9,VEGFC,IGF1,EFNA5,PLVAP,SFRP1,LYN,PADI2,SHANK3,PLAUR,PRKCQ,TIE1
GO:BP	secretion	GO:0046903	FALSE	0.028471	1.5456	963	138	19	21031	FGF10,FCER1A,CCL5,RAPGEF4,PCSK6,MCTP1,BLK,AQP9,MYRIP,VEGFC,IGF1,EFNA5,BMP6,SFRP1,MERTK,RAB31,LYN,NKG7,TLR2
GO:BP	sensory system development	GO:0048880	FALSE	0.0289995	1.53761	412	138	12	21031	SEMA3A,FGF10,BCL11B,MFAP5,COL5A2,RHOJ,SMOC1,BMP6,MERTK,OLFM3,COL4A1,C1QA
GO:BP	regulation of phosphorylation	GO:0042325	FALSE	0.0297234	1.5269	966	138	19	21031	FGF10,BANK1,CCL5,SLC8A1,MARCO,PKIB,SLC11A1,FLT3,VEGFC,IGF1,EFNA5,CNKSR3,ENPP1,BMP6,SFRP1,CD86,LYN,EREG,PLAUR
GO:BP	mononuclear cell differentiation	GO:1903131	TRUE	0.0301546	1.52065	484	138	13	21031	MS4A1,ITGB8,CD79A,BCL11B,FLT3,POU2AF1,THEMIS,CTLA4,SFRP1,MERTK,CD86,IL7R,LYN
GO:BP	response to nitrogen compound	GO:1901698	FALSE	0.0319121	1.49604	1060	138	20	21031	SLC8A1,COL5A2,GJB2,AQP9,FLT3,IGF1,MZB1,ABCC9,COL6A1,ENPP1,SFRP1,EDNRA,RAB31,LYN,FOLR2,EREG,PRKCQ,TLR2,COL4A1,PDE3A
GO:BP	negative regulation of T cell apoptotic process	GO:0070233	TRUE	0.0325328	1.48768	25	138	4	21031	CCL5,BCL11B,IL7R,PRKCQ
GO:BP	neurogenesis	GO:0022008	FALSE	0.034853	1.45776	1742	138	27	21031	SEMA3A,PREX2,PTPRB,FGF10,BCL11B,SEMA5A,RTN1,ADGRB3,TNXB,ADAMTSL1,SEMA3C,CRTAC1,POSTN,NEGR1,VEGFC,EFNA5,BMP6,SFRP1,EDNRA,NTN4,LYN,OLFM3,SHANK3,PRKCQ,TLR2,NOTCH3,C1QA
GO:BP	response to other organism	GO:0051707	FALSE	0.0376258	1.42451	1548	138	25	21031	MS4A1,ITGB8,FGF10,BANK1,CCL5,RBM47,MARCO,BLK,GJB2,SLC11A1,WDFY4,ITGAX,ADAMTS5,ADAMTS9,POU2AF1,ABCC9,BMP6,CD86,IL7R,LYN,EREG,NKG7,MRC1,TLR2,C1QA
GO:BP	developmental cell growth	GO:0048588	FALSE	0.0386031	1.41338	233	138	9	21031	SEMA3A,SEMA5A,SEMA3C,POSTN,IGF1,EFNA5,COL14A1,EDNRA,PI16
GO:BP	response to external biotic stimulus	GO:0043207	FALSE	0.0388635	1.41046	1551	138	25	21031	MS4A1,ITGB8,FGF10,BANK1,CCL5,RBM47,MARCO,BLK,GJB2,SLC11A1,WDFY4,ITGAX,ADAMTS5,ADAMTS9,POU2AF1,ABCC9,BMP6,CD86,IL7R,LYN,EREG,NKG7,MRC1,TLR2,C1QA
GO:BP	neuron development	GO:0048666	FALSE	0.0391372	1.40741	1167	138	21	21031	SEMA3A,PREX2,BCL11B,SEMA5A,ADGRB3,TNXB,ADAMTSL1,SEMA3C,CRTAC1,POSTN,NEGR1,EFNA5,SFRP1,EDNRA,NTN4,LYN,OLFM3,SHANK3,PRKCQ,NOTCH3,C1QA
GO:BP	wound healing	GO:0042060	TRUE	0.0393615	1.40493	425	138	12	21031	VWF,FGF10,F13A1,ABI3BP,SLC11A1,IGF1,MERTK,LYN,MMRN1,EREG,PLAUR,PRKCQ
GO:BP	regulation of leukocyte apoptotic process	GO:2000106	TRUE	0.0429081	1.36746	89	138	6	21031	CCL5,BCL11B,MERTK,IL7R,LYN,PRKCQ
GO:BP	negative regulation of leukocyte apoptotic process	GO:2000107	FALSE	0.0487608	1.31193	55	138	5	21031	CCL5,BCL11B,MERTK,IL7R,PRKCQ
GO:BP	nervous system development	GO:0007399	FALSE	0.0499228	1.3017	2531	138	34	21031	SEMA3A,PREX2,PTPRB,FGF10,BCL11B,SEMA5A,RTN1,ADGRB3,THBS2,TNXB,ADAMTSL1,SEMA3C,ITGAX,CRTAC1,SNTG2,POSTN,NEGR1,VEGFC,PCDH17,EFNA5,BMP6,SFRP1,MERTK,EDNRA,NTN4,LYN,OLFM3,PADI2,SHANK3,PRKCQ,TLR2,NOTCH3,COL4A1,C1QA

[truncated: 1 more sheets: SD11]
