# Supplementary material for: scTFBridge: A Disentangled Deep Generative Model Informed by TF-Motif Binding for Gene Regulation Inference in Single-Cell Multi-Omics
Source: Research Square preprint supplement (doi:10.21203/rs.3.rs-6093896/v1), 2025-03-18
Supplement: Supplementary file 3 [file 822d97d33d84919c829d594b.xlsx]

## Sheet: SuppTbl1
Supplementary Table 1. single cell eQTL groundtruth for cis-regulation inference in scQTLbase website
Cell type	Single cell groudtruth
CD14 Mono	Perez2022Science_7.sig_qtl.tsv
CD8 Naive	Perez2022Science_1.sig_qtl.tsv
CD4 TCM	YAZAR2022Sci_5.sig_qtl.tsv
CD4 TEM	YAZAR2022Sci_1.sig_qtl.tsv
Memory B	YAZAR2022Sci_9.sig_qtl.tsv
CD8 TEM	YAZAR2022Sci_4.sig_qtl.tsv
cDC	Perez2022Science_3.sig_qtl.tsv
CD4 Naïve	Perez2022Science_15.sig_qtl.tsv

## Sheet: SuppTbl2
Supplementary Table 2. CistromeID of TF Chip-seq served as groundtruth for trans-regulation
Cell type	TF	CistromeID
CD4 Naive	ETS1	44092
CD4 Naive	ERG	47416
Naive B cells	RUNX3	46131
Naive B cells	BATF	46109
Naive B cells	EBF1	45656
Naive B cells	PAX5	34475
Naive B cells	CTCF	86684
CD14 Mono	STAT1	41287
CD14 Mono	STAT1	41288
CD14 Mono	STAT1	41289
CD14 Mono	STAT1	41290
CD14 Mono	IRF1	41301
CD14 Mono	IRF1	41302
CD14 Mono	IRF1	41303
CD14 Mono	RUNX1	81223
CD14 Mono	SPl1	85986
CD14 Mono	CTCF	45444

## Sheet: SuppTbl3
Supplementary Table 3. Hyperparameters of scTFBridge training
Learning object	weight
Multi-omics reconstruction	1
KL Divergence	0.0001
MI block	1
Multi-omics alignment	0.1
